# Supplementary material for: Involvement of FLOWERING LOCUS T in microgravity response of Arabidopsis thaliana plants under long- and short-day conditions
Source: Research Square preprint supplement (doi:10.21203/rs.3.rs-400169/v1), 2021-04-15
Supplement: Supplementary file 1 [file 0c650f9bf9aae22b35a5f1ee.xlsx]

## Sheet: WT-ug-LD.vs.WT-1g-LD
Supplementary Table S3 Expression data of identified genes of wild-type (WT) plants grown under the long-day (LD) in microgravity (µg) in space were compared with those under the LD on ground(WT-µg-LD versus WT-1g-LD).
probe_set_ID	gene title	gene symbol	ensembl	sample_1	sample_2	value_1	value_2	log2(fold_change)	p_value
253971_at	fructose-bisphosphate aldolase 5	AT4G26530	AT4G26530	WT-µg-LD	WT-1g-LD	1470.06	4.21857	8.44491	0.00538428
252366_at	Haloacid dehalogenase-like hydrolase (HAD) superfamily protein	AT3G48420	AT3G48420	WT-µg-LD	WT-1g-LD	950.081	5.24776	7.5002	0.00263769
262883_at	ATAMT1;2 (AMMONIUM TRANSPORTER 1;2); ammonium transmembrane transporter	ATAMT1;2	AT1G64780	WT-µg-LD	WT-1g-LD	359.928	2.89033	6.96033	0.00640198
246854_at	mitochondrial substrate carrier family protein	AT5G26200	AT5G26200	WT-µg-LD	WT-1g-LD	191.771	1.90781	6.65132	0.0157379
263287_at	hypothetical protein	AT2G36145	AT2G36145	WT-µg-LD	WT-1g-LD	392.866	4.29798	6.51423	0.026751
251373_at	GATA transcription factor 4	GATA4	AT3G60530	WT-µg-LD	WT-1g-LD	276.936	3.81047	6.18344	0.0150573
265058_s_at	MBP2 (MYROSINASE-BINDING PROTEIN 2); sugar binding / thioglucosidase binding	MBP2	AT1G52030 /// AT1G52040	WT-µg-LD	WT-1g-LD	392.535	5.48479	6.16124	0.000631998
248065_at	mitochondrial transcription termination factor family protein	AT5G55580	AT5G55580	WT-µg-LD	WT-1g-LD	250.199	3.72685	6.06898	0.00674554
246411_at	FAD/NAD(P)-binding oxidoreductase domain-containing protein	AT1G57770	AT1G57770	WT-µg-LD	WT-1g-LD	509.187	7.97512	5.99654	0.0163508
250828_at	hypothetical protein	AT5G05250	AT5G05250	WT-µg-LD	WT-1g-LD	783.401	12.5021	5.96951	0.0365909
247684_at	Leucine-rich repeat protein kinase family protein	AT5G59670	AT5G59670	WT-µg-LD	WT-1g-LD	170.531	2.80561	5.92558	0.020197
263761_at	fructose-bisphosphate aldolase 1	FBA1	AT2G21330	WT-µg-LD	WT-1g-LD	9090.95	150.196	5.91952	0.000394684
264096_at	hypothetical protein	AT1G78995	AT1G78995	WT-µg-LD	WT-1g-LD	586.357	9.7849	5.90508	0.0330235
248377_at	CDGSH iron-sulfur domain-containing protein NEET	AT5G51720	AT5G51720	WT-µg-LD	WT-1g-LD	323.818	5.69601	5.82909	0.0129425
265892_at	hypothetical protein	AT2G15020	AT2G15020	WT-µg-LD	WT-1g-LD	901.473	15.8832	5.82671	0.0557364
254328_at	APT3 (ADENINE PHOSPHORIBOSYL TRANSFERASE 3); adenine phosphoribosyltransferase	APT3	AT4G22570	WT-µg-LD	WT-1g-LD	691.313	12.4685	5.79298	0.0173477
247218_at	ASN2 (ASPARAGINE SYNTHETASE 2); asparagine synthase (glutamine-hydrolyzing)	ASN2	AT5G65010	WT-µg-LD	WT-1g-LD	2513.7	47.3835	5.72928	0.034578
256248_at	fip1 motif-containing protein	AT3G66652	AT3G66652	WT-µg-LD	WT-1g-LD	87.6262	1.70095	5.68695	0.0335679
259640_at	BGLU18 (BETA GLUCOSIDASE 18); catalytic/ cation binding / hydrolase, hydrolyzing O-glycosyl compounds	BGLU18	AT1G52400	WT-µg-LD	WT-1g-LD	1250.66	24.3198	5.68441	0.0289565
261263_at	Dof-type zinc finger DNA-binding family protein	AT1G26790	AT1G26790	WT-µg-LD	WT-1g-LD	237.995	4.6475	5.67833	0.00410804
247252_at	root meristem growth factor 9	RGF9	AT5G64770	WT-µg-LD	WT-1g-LD	234.685	4.63311	5.6626	0.0717679
260770_at	RING-H2 finger protein ATL75	AT1G49200	AT1G49200	WT-µg-LD	WT-1g-LD	1208.31	23.8792	5.66109	0.0160088
258497_at	COL2 (constans-like 2); transcription factor/ zinc ion binding	COL2	AT3G02380	WT-µg-LD	WT-1g-LD	5316.83	108.731	5.61173	0.0340992
247400_at	phosphoglycerate mutase family protein	AT5G62840	AT5G62840	WT-µg-LD	WT-1g-LD	308.889	6.75229	5.51557	0.0452146
249876_at	CaS (Calcium sensing receptor)	CaS	AT5G23060	WT-µg-LD	WT-1g-LD	4630.65	101.708	5.50871	0.0202482
259625_at	GAPB (GLYCERALDEHYDE-3-PHOSPHATE DEHYDROGENASE B SUBUNIT); glyceraldehyde-3-phosphate dehydrogenase (NADP+)/ glyceraldehyde-3-phosphate dehydrogenase	GAPB	AT1G42970	WT-µg-LD	WT-1g-LD	13299.5	295.418	5.49247	0.0236914
257891_at	RFC3 (REGULATOR OF FATTY-ACID COMPOSITION 3); structural constituent of ribosome	RFC3	AT3G17170	WT-µg-LD	WT-1g-LD	835.845	19.0644	5.45428	0.033045
248231_at	nucleotidyltransferase family protein	AT5G53770	AT5G53770	WT-µg-LD	WT-1g-LD	226.142	5.15955	5.45384	0.0432907
249472_at	CRR7 (CHLORORESPIRATORY REDUCTION 7)	CRR7	AT5G39210	WT-µg-LD	WT-1g-LD	241.794	5.72905	5.39934	0.0327456
245947_at	ACL5 (ACAULIS 5); spermine synthase/ thermospermine synthase	ACL5	AT5G19530	WT-µg-LD	WT-1g-LD	299.538	7.27099	5.36444	0.0455327
259609_at	TSA1 (TSK-ASSOCIATING PROTEIN 1); calcium ion binding / protein binding	TSA1	AT1G52410	WT-µg-LD	WT-1g-LD	158.354	3.9294	5.3327	0.046095
248687_at	ADG1 (ADP GLUCOSE PYROPHOSPHORYLASE 1); glucose-1-phosphate adenylyltransferase	ADG1	AT5G48300	WT-µg-LD	WT-1g-LD	1936.22	48.222	5.32741	0.0331231
245744_at	putative plastid-lipid-associated protein 12	AT1G51110	AT1G51110	WT-µg-LD	WT-1g-LD	380.058	9.64039	5.30099	0.0475332
253387_at	AtGLDP1 (Arabidopsis thaliana glycine decarboxylase P-protein 1); catalytic/ glycine dehydrogenase (decarboxylating)/ pyridoxal phosphate binding	AtGLDP1	AT4G33010	WT-µg-LD	WT-1g-LD	7696.29	198.283	5.27853	0.000858491
247709_at	Major facilitator superfamily protein	AT5G59250	AT5G59250	WT-µg-LD	WT-1g-LD	813.861	21.3251	5.25416	0.0336979
253975_at	S-adenosyl-L-methionine-dependent methyltransferase-like protein	AT4G26600	AT4G26600	WT-µg-LD	WT-1g-LD	177.262	4.74162	5.22436	0.0517964
261381_at	SDE3 (SILENCING DEFECTIVE); RNA helicase	SDE3	AT1G05460	WT-µg-LD	WT-1g-LD	53.3176	1.51146	5.1406	0.000854155
251784_at	PPL1 (PsbP-like protein 1); calcium ion binding	PPL1	AT3G55330	WT-µg-LD	WT-1g-LD	2847.17	81.3104	5.12994	0.0200411
249606_at	RVE2 (REVEILLE 2); DNA binding / transcription factor	RVE2	AT5G37260	WT-µg-LD	WT-1g-LD	3111.97	90.0694	5.11065	0.0273522
248075_at	CRR21 (chlororespiratory reduction 21)	CRR21	AT5G55740	WT-µg-LD	WT-1g-LD	128.013	3.83361	5.06145	0.00747062
261942_at	MADS-box family protein	AGL87	AT1G22590	WT-µg-LD	WT-1g-LD	138.998	4.31723	5.00882	0.00298602
245213_at	NPQ4 (NONPHOTOCHEMICAL QUENCHING); chlorophyll binding / xanthophyll binding	NPQ4	AT1G44575	WT-µg-LD	WT-1g-LD	6471.91	202.595	4.99752	0.0111757
256015_at	LHCA6; chlorophyll binding	LHCA6	AT1G19150	WT-µg-LD	WT-1g-LD	427.902	13.5478	4.98115	0.047106
250099_at	myb family transcription factor RVE1	RVE1	AT5G17300	WT-µg-LD	WT-1g-LD	2743.92	88.9563	4.947	0.0393821
266951_at	pentatricopeptide repeat-containing protein	AT2G18940	AT2G18940	WT-µg-LD	WT-1g-LD	315.757	10.4085	4.92298	0.00726855
245227_s_at	P-loop containing nucleoside triphosphate hydrolases superfamily protein	AT1G08410	AT1G08410	WT-µg-LD	WT-1g-LD	160.627	5.41239	4.8913	0.0200546
245701_at	GLU1 (GLUTAMATE SYNTHASE 1); glutamate synthase (ferredoxin)	GLU1	AT5G04140	WT-µg-LD	WT-1g-LD	4176.86	140.794	4.89076	0.0447019
247474_at	hypothetical protein	AT5G62280	AT5G62280	WT-µg-LD	WT-1g-LD	305.007	10.3977	4.87451	0.135152
251155_at	hypothetical protein	AT3G63160	AT3G63160	WT-µg-LD	WT-1g-LD	2525.79	86.1586	4.8736	0.0213886
259161_at	CA1 (CARBONIC ANHYDRASE 1); carbonate dehydratase/ zinc ion binding	CA1	AT3G01500	WT-µg-LD	WT-1g-LD	9078.61	312.835	4.859	0.0108123
258871_at	P-loop containing nucleoside triphosphate hydrolases superfamily protein	AT3G03060	AT3G03060	WT-µg-LD	WT-1g-LD	120.909	4.17645	4.8555	0.0289859
267549_at	Lycopene beta/epsilon cyclase protein	AT2G32640	AT2G32640	WT-µg-LD	WT-1g-LD	173.027	5.98663	4.85311	0.0668658
245306_at	ELIP2 (EARLY LIGHT-INDUCIBLE PROTEIN 2); chlorophyll binding	ELIP2	AT4G14690	WT-µg-LD	WT-1g-LD	2236.34	78.0809	4.84002	0.021195
254150_at	phosphorylase family protein	AT4G24350	AT4G24350	WT-µg-LD	WT-1g-LD	499.896	17.7989	4.81176	0.0576149
262288_at	CRR23 ((chlororespiratory reduction 23)	CRR23	AT1G70760	WT-µg-LD	WT-1g-LD	1137.46	41.0635	4.79182	0.0329798
266934_at	transducin/WD40 repeat-like superfamily protein	AT2G18900	AT2G18900	WT-µg-LD	WT-1g-LD	344.072	12.625	4.76835	0.0765996
256070_at	nuclear transport factor 2 family protein with RNA binding domain	AT1G13730	AT1G13730	WT-µg-LD	WT-1g-LD	287.821	10.5672	4.76751	0.0109565
255719_at	plastidal glycolate/glycerate translocator 1	AT1G32080	AT1G32080	WT-µg-LD	WT-1g-LD	2171.3	80.1339	4.76	0.0304756
250503_at	putative plastid-lipid-associated protein 7	AT5G09820	AT5G09820	WT-µg-LD	WT-1g-LD	344.05	12.7909	4.74943	0.0752171
252853_at	FK506-binding protein 16-2	FKBP16-2	AT4G39710	WT-µg-LD	WT-1g-LD	806.839	30.1913	4.74007	0.0226288
254642_at	NAD(P)-binding Rossmann-fold superfamily protein	AT4G18810	AT4G18810	WT-µg-LD	WT-1g-LD	646.503	24.2136	4.73877	0.0409855
249191_at	leucine carboxyl methyltransferase	AT5G42760	AT5G42760	WT-µg-LD	WT-1g-LD	532.747	20.4802	4.70115	0.0120812
251157_at	CSP41A (CHLOROPLAST STEM-LOOP BINDING PROTEIN OF 41 KDA); mRNA binding / poly(U) binding	CSP41A	AT3G63140	WT-µg-LD	WT-1g-LD	1838.45	71.5678	4.68304	0.0433659
264014_at	SAUR-like auxin-responsive protein	AT2G21210	AT2G21210	WT-µg-LD	WT-1g-LD	785.34	31.631	4.63391	0.0226905
263497_at	COR15A (COLD-REGULATED 15A)	COR15A	AT2G42540	WT-µg-LD	WT-1g-LD	6297.19	256.394	4.61828	0.027973
252965_at	SAUR-like auxin-responsive protein	AT4G38860	AT4G38860	WT-µg-LD	WT-1g-LD	499.244	20.5757	4.60073	0.0385198
250498_at	PMDH2 (peroxisomal NAD-malate dehydrogenase 2); malate dehydrogenase	PMDH2	AT5G09660	WT-µg-LD	WT-1g-LD	9603.25	396.119	4.59952	0.00161435
261422_at	NDF6 (NDH DEPENDENT FLOW 6)	NDF6	AT1G18730	WT-µg-LD	WT-1g-LD	1775.43	74.6033	4.57278	0.0533896
263142_at	hypothetical protein	AT1G65230	AT1G65230	WT-µg-LD	WT-1g-LD	982.797	41.7459	4.55719	0.0416074
263252_at	STH; protein domain specific binding / transcription factor/ zinc ion binding	STH	AT2G31380	WT-µg-LD	WT-1g-LD	3577.46	152.976	4.54756	0.0151299
259348_at	putative inactive leucine-rich repeat receptor-like protein kinase	AT3G03770	AT3G03770	WT-µg-LD	WT-1g-LD	141.901	6.13742	4.53111	0.0236115
251762_at	SBPASE (sedoheptulose-bisphosphatase); phosphoric ester hydrolase/ sedoheptulose-bisphosphatase	SBPASE	AT3G55800	WT-µg-LD	WT-1g-LD	6417.93	280.028	4.51846	0.0184738
262533_at	hypothetical protein	AT1G17090	AT1G17090	WT-µg-LD	WT-1g-LD	215.009	9.51633	4.49785	0.0973802
262151_at	putative hydrolase	AT1G52510	AT1G52510	WT-µg-LD	WT-1g-LD	540.377	24.0801	4.48805	0.0351406
245150_at	PHR2 (photolyase/blue-light receptor 2); DNA photolyase	PHR2	AT2G47590	WT-µg-LD	WT-1g-LD	357.774	16.0717	4.47645	0.0519372
251658_at	calcium-dependent phosphotriesterase superfamily protein	AT3G57020	AT3G57020	WT-µg-LD	WT-1g-LD	2143.03	96.7951	4.46857	0.00274337
247563_at	PDCB1 (PLASMODESMATA CALLOSE-BINDING PROTEIN 1); callose binding / polysaccharide binding	PDCB1	AT5G61130	WT-µg-LD	WT-1g-LD	332.213	15.3587	4.43498	0.0155117
254066_at	DREB1A (DEHYDRATION RESPONSE ELEMENT B1A); DNA binding / transcription activator/ transcription factor	DREB1A	AT4G25480	WT-µg-LD	WT-1g-LD	1241.82	57.4245	4.43465	0.0374369
256874_at	CYP71B36; electron carrier/ heme binding / iron ion binding / monooxygenase/ oxygen binding	CYP71B36	AT3G26320	WT-µg-LD	WT-1g-LD	465.944	21.5698	4.43307	0.0127976
257262_at	B-box type zinc finger-containing protein	AT3G21890	AT3G21890	WT-µg-LD	WT-1g-LD	871.694	40.8802	4.41435	0.0251549
261488_at	NAD(P)-linked oxidoreductase-like protein	AT1G14345	AT1G14345	WT-µg-LD	WT-1g-LD	1580.13	76.133	4.37538	0.0298278
252353_at	hypothetical protein	AT3G48200	AT3G48200	WT-µg-LD	WT-1g-LD	935.251	45.2997	4.36778	0.0143197
251885_at	fructose-1,6-bisphosphatase	HCEF1	AT3G54050	WT-µg-LD	WT-1g-LD	5273.4	267.246	4.30249	0.0515735
245623_s_at	F-box/LRR-repeat protein /// F-box/LRR-repeat protein	AT4G14096 /// AT4G14103	AT4G14096 /// AT4G14103	WT-µg-LD	WT-1g-LD	42.7187	2.20663	4.27495	0.00321132
245504_at	monothiol glutaredoxin-S8	AT4G15660	AT4G15660	WT-µg-LD	WT-1g-LD	617.854	32.352	4.25534	0.00726072
261788_at	NDF1 (NDH-DEPENDENT CYCLIC ELECTRON FLOW 1)	NDF1	AT1G15980	WT-µg-LD	WT-1g-LD	959.36	50.4915	4.24796	0.0218769
258087_at	ATPRX Q; antioxidant/ peroxiredoxin	ATPRX Q	AT3G26060	WT-µg-LD	WT-1g-LD	1566.58	82.4505	4.24795	0.0328184
249120_at	NAD(P)H dehydrogenase 18	NDH18	AT5G43750	WT-µg-LD	WT-1g-LD	673.95	35.806	4.23437	0.0492292
248566_s_at	ATFRO7 (FERRIC REDUCTION OXIDASE 7); ferric-chelate reductase/ oxidoreductase	ATFRO7	AT5G49730 /// AT5G49740	WT-µg-LD	WT-1g-LD	8982.24	484.549	4.21236	0.0227146
253943_at	palmitate desaturase	FADA	AT4G27030	WT-µg-LD	WT-1g-LD	419.434	22.6324	4.21198	0.033773
265073_at	ZKT protein containing PDZ, K-box and a TPR region	ZKT	AT1G55480	WT-µg-LD	WT-1g-LD	1985.6	107.185	4.2114	0.0138241
255513_at	PRL (PROLIFERA); ATP binding / DNA binding / DNA-dependent ATPase/ nucleoside-triphosphatase/ nucleotide binding	PRL	AT4G02060	WT-µg-LD	WT-1g-LD	141.558	7.71912	4.19681	0.224779
252367_at	BT2 (BTB AND TAZ DOMAIN PROTEIN 2); protein binding / transcription factor/ transcription regulator	BT2	AT3G48360	WT-µg-LD	WT-1g-LD	4482.73	244.63	4.1957	0.0139513
253605_at	down-regulated in metastasis (DRIM) domain-containing protein	AT4G30990	AT4G30990	WT-µg-LD	WT-1g-LD	117.391	6.40989	4.19488	0.0314892
255607_at	GDSL esterase/lipase	AT4G01130	AT4G01130	WT-µg-LD	WT-1g-LD	560.445	31.1627	4.16868	0.00184588
252534_at	MYB111 (MYB DOMAIN PROTEIN 111); DNA binding / transcription factor	MYB111	AT3G46130	WT-µg-LD	WT-1g-LD	73.8007	4.1245	4.16134	0.0363417
250075_at	hydrolase-like protein	AT5G17670	AT5G17670	WT-µg-LD	WT-1g-LD	634.967	35.6708	4.15387	0.026158
247367_at	oxygen-independent coproporphyrinogen III oxidase-like protein	AT5G63290	AT5G63290	WT-µg-LD	WT-1g-LD	540.438	31.4522	4.1029	0.0533639
266618_at	hypothetical protein	AT2G35480	AT2G35480	WT-µg-LD	WT-1g-LD	105.562	6.15941	4.09916	0.0448125
254493_at	multiple organellar RNA editing factor 1	AT4G20020	AT4G20020	WT-µg-LD	WT-1g-LD	379.73	22.1929	4.09681	0.0161471
252123_at	F3H (FLAVANONE 3-HYDROXYLASE); naringenin 3-dioxygenase	F3H	AT3G51240	WT-µg-LD	WT-1g-LD	136.791	8.00224	4.09542	0.0172352
245745_at	putative plastid-lipid-associated protein 12	AT1G51110	AT1G51110	WT-µg-LD	WT-1g-LD	806.197	47.2024	4.0942	0.0200074
249658_s_at	PGLP1 (2-PHOSPHOGLYCOLATE PHOSPHATASE 1); phosphoglycolate phosphatase	PGLP1	AT5G36700 /// AT5G36790	WT-µg-LD	WT-1g-LD	4363.37	256.126	4.09052	0.00338139
264839_at	POR C (PROTOCHLOROPHYLLIDE OXIDOREDUCTASE); NADPH dehydrogenase/ oxidoreductase/ protochlorophyllide reductase	POR C	AT1G03630	WT-µg-LD	WT-1g-LD	602.166	35.4089	4.08798	0.0448579
251309_at	(+)-neomenthol dehydrogenase	AT3G61220	AT3G61220	WT-µg-LD	WT-1g-LD	2000.69	117.705	4.08725	0.00876664
265076_at	CPN60B (CHAPERONIN 60 BETA); ATP binding / protein binding	CPN60B	AT1G55490	WT-µg-LD	WT-1g-LD	2807.05	165.167	4.08706	0.0461223
263495_at	COR15B (COLD REGULATED 15B)	COR15B	AT2G42530	WT-µg-LD	WT-1g-LD	2029.42	119.975	4.08026	0.0196684
247486_at	hypothetical protein	AT5G62140	AT5G62140	WT-µg-LD	WT-1g-LD	157.088	9.3268	4.07404	0.127115
258025_at	D-3-phosphoglycerate dehydrogenase	AT3G19480	AT3G19480	WT-µg-LD	WT-1g-LD	284.275	17.1383	4.05199	0.0196558
254074_at	CBF1 (C-REPEAT/DRE BINDING FACTOR 1); DNA binding / transcription activator/ transcription factor	CBF1	AT4G25490	WT-µg-LD	WT-1g-LD	3914.93	237.787	4.04124	0.0480448
267168_at	aldo-keto reductase family 4 member C9	AT2G37770	AT2G37770	WT-µg-LD	WT-1g-LD	392.568	23.9344	4.03579	0.0109818
245877_at	GCN5-like N-acetyltransferase	AT1G26220	AT1G26220	WT-µg-LD	WT-1g-LD	340.461	20.8535	4.02913	0.0534399
257533_at	alpha/beta-hydrolase domain-containing protein	AT3G10840	AT3G10840	WT-µg-LD	WT-1g-LD	271.564	16.7386	4.02004	0.0341576
256890_at	GRP4 (GLYCINE-RICH RNA-BINDING PROTEIN 4); RNA binding / double-stranded DNA binding / single-stranded DNA binding	GRP4	AT3G23830	WT-µg-LD	WT-1g-LD	561.461	34.8903	4.00829	0.0438344
249490_s_at	germin-like protein subfamily 1 member 14 /// germin-like protein subfamily 1 member 15 /// germin-like protein subfamily 1 member 17 /// germin-like protein subfamily 1 member 19	AT5G39110 /// AT5G39120 /// AT5G39150 /// AT5G39180	AT5G39110 /// AT5G39120 /// AT5G39150 /// AT5G39180	WT-µg-LD	WT-1g-LD	103.571	6.50154	3.99369	0.492813
246313_at	pentatricopeptide repeat-containing protein	AT1G31920	AT1G31920	WT-µg-LD	WT-1g-LD	164.22	10.321	3.99198	0.0390656
245304_at	hypothetical protein	AT4G15630	AT4G15630	WT-µg-LD	WT-1g-LD	782.036	49.5301	3.98086	0.0281488
264394_at	aminomethyltransferase	AT1G11860	AT1G11860	WT-µg-LD	WT-1g-LD	4099.91	259.752	3.98039	0.0126015
254298_at	PGR5-LIKE A	PGR5-LIKE A	AT4G22890	WT-µg-LD	WT-1g-LD	3681.99	234.569	3.9724	0.00609862
249524_at	alpha/beta-hydrolase-like protein	AT5G38520	AT5G38520	WT-µg-LD	WT-1g-LD	791.311	50.7154	3.96375	0.0255685
245088_at	subtilisin-like serine protease	AT2G39850	AT2G39850	WT-µg-LD	WT-1g-LD	201.29	12.9219	3.96139	0.0463062
260292_at	MURE; ATP binding / acid-amino acid ligase/ ligase	MURE	AT1G63680	WT-µg-LD	WT-1g-LD	187.717	12.1673	3.94747	0.0365619
263676_at	CRB (CHLOROPLAST RNA BINDING); binding / catalytic/ coenzyme binding	CRB	AT1G09340	WT-µg-LD	WT-1g-LD	7619.39	494.225	3.94644	0.017138
253496_at	ATGPX7 (glutathione peroxidase 7); glutathione peroxidase	ATGPX7	AT4G31870	WT-µg-LD	WT-1g-LD	551.873	35.843	3.94457	0.0254574
259244_at	COL9 (CONSTANS-LIKE 9); transcription factor/ zinc ion binding	COL9	AT3G07650	WT-µg-LD	WT-1g-LD	476.095	31.0554	3.93834	0.0305703
260812_at	nodulin MtN21 /EamA-like transporter protein	AT1G43650	AT1G43650	WT-µg-LD	WT-1g-LD	115.575	7.6429	3.91857	0.0157445
260669_at	methyltransferase-like protein 2	AT1G19340	AT1G19340	WT-µg-LD	WT-1g-LD	178.18	11.8003	3.91644	0.0230638
262263_at	PIN3 (PIN-FORMED 3); auxin:hydrogen symporter/ transporter	PIN3	AT1G70940	WT-µg-LD	WT-1g-LD	1187.55	78.9557	3.9108	0.0450906
252929_at	fructose-bisphosphate aldolase 2	FBA2	AT4G38970	WT-µg-LD	WT-1g-LD	16253.9	1095.2	3.89153	0.0252655
255720_at	PRK (PHOSPHORIBULOKINASE); ATP binding / phosphoribulokinase/ protein binding	PRK	AT1G32060	WT-µg-LD	WT-1g-LD	11778.6	794.62	3.88976	0.0201782
250007_at	BMY3; beta-amylase/ catalytic/ cation binding	BMY3	AT5G18670	WT-µg-LD	WT-1g-LD	3783.41	259.288	3.86706	0.0350963
256057_at	NDA1 (ALTERNATIVE NAD(P)H DEHYDROGENASE 1); NADH dehydrogenase	NDA1	AT1G07180	WT-µg-LD	WT-1g-LD	1243.49	85.8002	3.85728	0.0236856
261914_at	dirigent protein 21	AT1G65870	AT1G65870	WT-µg-LD	WT-1g-LD	124.079	8.56342	3.85692	0.0213176
258470_at	glycoprotein membrane precursor GPI-anchored protein	AT3G06035	AT3G06035	WT-µg-LD	WT-1g-LD	75.337	5.22043	3.85112	0.011456
262970_at	protein disulfide-isomerase LQY1	AT1G75690	AT1G75690	WT-µg-LD	WT-1g-LD	2307.52	160.506	3.84564	0.0106032
258505_at	U3snoRNP10 and NUC211 domain-containing protein	AT3G06530	AT3G06530	WT-µg-LD	WT-1g-LD	425.514	29.9572	3.82823	0.0280054
263840_at	hypothetical protein	AT2G36885	AT2G36885	WT-µg-LD	WT-1g-LD	57.2249	4.04483	3.82249	0.0359838
252102_at	LTI30 (LOW TEMPERATURE-INDUCED 30)	LTI30	AT3G50970	WT-µg-LD	WT-1g-LD	5822.33	412.229	3.82008	0.0353677
264483_at	tetratricopeptide repeat-containing protein	AT1G77230	AT1G77230	WT-µg-LD	WT-1g-LD	67.7206	4.84122	3.80615	0.00530966
267044_at	NUC173 domain-containing protein	AT2G34357	AT2G34357	WT-µg-LD	WT-1g-LD	427.775	30.7062	3.80025	0.0355865
256625_at	RING finger-related, SNF2 and helicase domain-containing protein	AT3G20010	AT3G20010	WT-µg-LD	WT-1g-LD	90.7049	6.54837	3.79197	0.0214042
261197_at	GAPA-2 (GLYCERALDEHYDE 3-PHOSPHATE DEHYDROGENASE A SUBUNIT 2); NAD or NADH binding / binding / catalytic/ glyceraldehyde-3-phosphate dehydrogenase (phosphorylating)/ glyceraldehyde-3-phosphate dehydrogenase	GAPA-2	AT1G12900	WT-µg-LD	WT-1g-LD	7191.99	521.402	3.78593	0.0512637
250006_at	PCB2 (PALE-GREEN AND CHLOROPHYLL B REDUCED 2); 3,8-divinyl protochlorophyllide a 8-vinyl reductase	PCB2	AT5G18660	WT-µg-LD	WT-1g-LD	97.9033	7.09809	3.78585	0.0475395
255786_at	ATCLH1 (ARABIDOPSIS THALIANA CORONATINE-INDUCED PROTEIN 1); chlorophyllase	ATCLH1	AT1G19670	WT-µg-LD	WT-1g-LD	1527.43	111.762	3.77261	0.0443036
262922_at	hypothetical protein	AT1G79420	AT1G79420	WT-µg-LD	WT-1g-LD	38.4549	2.81889	3.76997	0.03003
253790_at	PSB28 (PHOTOSYSTEM II REACTION CENTER PSB28 PROTEIN)	PSB28	AT4G28660	WT-µg-LD	WT-1g-LD	1105.52	81.8227	3.75609	0.015714
253849_at	tetratricopeptide repeat domain protein	AT4G28080	AT4G28080	WT-µg-LD	WT-1g-LD	1368.56	101.383	3.75477	0.0469554
255645_at	SAUR-like auxin-responsive protein	AT4G00880	AT4G00880	WT-µg-LD	WT-1g-LD	1123.6	83.8223	3.74465	0.0195374
256076_at	hypothetical protein	AT1G18060	AT1G18060	WT-µg-LD	WT-1g-LD	1331.09	99.9469	3.7353	0.0397397
258397_at	hypothetical protein	AT3G15357	AT3G15357	WT-µg-LD	WT-1g-LD	246.908	18.5907	3.73132	0.0421273
259079_at	hypothetical protein	AT3G04950	---	WT-µg-LD	WT-1g-LD	56.099	4.22914	3.72954	0.0260283
258966_at	DNA gyrase subunit A	GYRA	AT3G10690	WT-µg-LD	WT-1g-LD	403.708	30.4678	3.72795	0.0345447
250073_at	ENH1 (enhancer of sos3-1); electron carrier/ metal ion binding / protein binding	ENH1	AT5G17170	WT-µg-LD	WT-1g-LD	3018.15	228.017	3.72645	0.00628725
266979_at	PPL2 (PsbP-like protein 2); calcium ion binding	PPL2	AT2G39470	WT-µg-LD	WT-1g-LD	1455.9	110.666	3.71762	0.00821321
253009_at	SHM1 (SERINE TRANSHYDROXYMETHYLTRANSFERASE 1); glycine hydroxymethyltransferase/ poly(U) binding	SHM1	AT4G37930	WT-µg-LD	WT-1g-LD	12799.3	974.908	3.71465	0.0212931
262879_at	SIGA (SIGMA FACTOR A); DNA binding / DNA-directed RNA polymerase/ sigma factor/ transcription factor	SIGA	AT1G64860	WT-µg-LD	WT-1g-LD	2407.25	183.46	3.71385	0.0342061
248389_at	CBF4 (C- REPEAT-BINDING FACTOR 4); DNA binding / transcription activator/ transcription factor	CBF4	AT5G51990	WT-µg-LD	WT-1g-LD	512.552	39.498	3.69785	0.0258523
265929_s_at	UDP-glycosyltransferase family protein /// UDP-glycosyltransferase 72D1	AT2G18560 /// AT2G18570	AT2G18560 /// AT2G18570	WT-µg-LD	WT-1g-LD	93.5978	7.24702	3.69102	0.143044
252411_at	PEX11B	PEX11B	AT3G47430	WT-µg-LD	WT-1g-LD	1402.26	108.698	3.68936	0.00451609
257168_at	HCF101 (HIGH-CHLOROPHYLL-FLUORESCENCE 101); ATP binding	HCF101	AT3G24430	WT-µg-LD	WT-1g-LD	1044.45	81.0402	3.68796	0.0213542
259464_at	hypothetical protein	AT1G18990	AT1G18990	WT-µg-LD	WT-1g-LD	193.937	15.1591	3.67733	0.0389704
264021_at	SAUR-like auxin-responsive protein	AT2G21200	AT2G21200	WT-µg-LD	WT-1g-LD	156.529	12.2761	3.67251	0.0466688
252863_at	MIPS1 (MYO-INOSITOL-1-PHOSTPATE SYNTHASE 1); inositol-3-phosphate synthase	MIPS1	AT4G39800	WT-µg-LD	WT-1g-LD	2729.93	214.905	3.6671	0.0177593
247629_at	SIZ1; DNA binding / SUMO ligase	SIZ1	AT5G60410	WT-µg-LD	WT-1g-LD	152.068	12.0566	3.65682	0.00945299
250955_at	CPUORF47 (CONSERVED PEPTIDE UPSTREAM OPEN READING FRAME 47)	CPUORF47	AT5G03190	WT-µg-LD	WT-1g-LD	96.303	7.64494	3.655	0.011186
253057_at	N-acetyl-l-glutamate synthase 2	NAGS2	AT4G37670	WT-µg-LD	WT-1g-LD	342.94	27.2283	3.65478	0.0210017
254080_at	FIB2 (FIBRILLARIN 2); snoRNA binding	FIB2	AT4G25630	WT-µg-LD	WT-1g-LD	1242.45	99.1603	3.64728	0.00794844
249544_at	ASF1B (ANTI- SILENCING FUNCTION 1B)	ASF1B	AT5G38110	WT-µg-LD	WT-1g-LD	196.397	15.6829	3.64651	0.0314955
258965_at	transducin/WD40 domain-containing protein	AT3G10530	AT3G10530	WT-µg-LD	WT-1g-LD	397.659	31.9041	3.63972	0.0384435
261958_at	glutaredoxin-like protein	AT1G64500	AT1G64500	WT-µg-LD	WT-1g-LD	1516.75	122.215	3.63349	0.0302401
255331_at	Chaperonin-like RbcX protein	AT4G04330	AT4G04330	WT-µg-LD	WT-1g-LD	439.181	36.193	3.60103	0.0121515
252010_at	hypothetical protein	AT3G52740	AT3G52740	WT-µg-LD	WT-1g-LD	291.634	24.0608	3.59941	0.0301373
251243_at	hypothetical protein	AT3G61870	AT3G61870	WT-µg-LD	WT-1g-LD	1624.01	134.522	3.59365	0.0121174
252001_at	FTSZ2-2; GTP binding / GTPase/ structural molecule	FTSZ2-2	AT3G52750	WT-µg-LD	WT-1g-LD	226.916	18.9162	3.58446	0.0305325
263975_at	ribosomal protein L1p/L10e family protein	AT2G42710	AT2G42710	WT-µg-LD	WT-1g-LD	206.664	17.5748	3.5557	0.0285574
245164_at	HSP60-2 (HEAT SHOCK PROTEIN 60-2); ATP binding	HSP60-2	AT2G33210	WT-µg-LD	WT-1g-LD	1361.9	115.887	3.55483	0.0282353
258607_at	TRXF1 (THIOREDOXIN F-TYPE 1); enzyme activator	TRXF1	AT3G02730	WT-µg-LD	WT-1g-LD	2726.28	232.475	3.55179	0.0281984
261948_at	hypothetical protein	AT1G64680	AT1G64680	WT-µg-LD	WT-1g-LD	1258.42	107.389	3.55068	0.0456672
264442_at	Lecithin-cholesterol acyltransferase-like 1	AT1G27480	AT1G27480	WT-µg-LD	WT-1g-LD	515.351	44.1606	3.54473	0.0278453
255078_at	APX4 (ASCORBATE PEROXIDASE 4); heme binding / peroxidase	APX4	AT4G09010	WT-µg-LD	WT-1g-LD	1640.4	140.575	3.54463	0.0197637
248920_at	CHLI2 (MAGNESIUM CHELATASE I2); ATPase/ magnesium chelatase	CHLI2	AT5G45930	WT-µg-LD	WT-1g-LD	259.63	22.3066	3.54091	0.0335641
255937_at	DDF1 (DWARF AND DELAYED FLOWERING 1); DNA binding / sequence-specific DNA binding / transcription factor	DDF1	AT1G12610	WT-µg-LD	WT-1g-LD	365.513	31.4722	3.53778	0.0232236
258181_at	nitrate transporter 1.3	AT3G21670	AT3G21670	WT-µg-LD	WT-1g-LD	1355.56	117.062	3.53354	0.0124809
263410_at	hypothetical protein	AT2G04039	AT2G04039	WT-µg-LD	WT-1g-LD	1314.87	115.32	3.5112	0.0300457
251083_at	hypothetical protein	AT5G01590	AT5G01590	WT-µg-LD	WT-1g-LD	148.714	13.0562	3.50973	0.0353388
254305_at	AKT2/3 (ARABIDOPSIS POTASSIUM TRANSPORT 2/3); cyclic nucleotide binding / inward rectifier potassium channel/ protein binding	AKT2/3	AT4G22200	WT-µg-LD	WT-1g-LD	231.028	20.3262	3.50665	0.0362554
265182_at	alkenal/one oxidoreductase	AT1G23740	AT1G23740	WT-µg-LD	WT-1g-LD	2249.1	198.493	3.50219	0.00849748
254163_s_at	phosphorylase family protein /// phosphorylase family protein	AT4G24340 /// AT4G24350	AT4G24340 /// AT4G24350	WT-µg-LD	WT-1g-LD	864.421	77.3805	3.48169	0.0486753
250243_at	GUN5 (GENOMES UNCOUPLED 5); magnesium chelatase	GUN5	AT5G13630	WT-µg-LD	WT-1g-LD	4544.7	408.25	3.47666	0.0334044
263674_at	hypothetical protein	AT2G04790	AT2G04790	WT-µg-LD	WT-1g-LD	233.294	21.1794	3.46142	0.0207529
262536_at	SOUL heme-binding protein	AT1G17100	AT1G17100	WT-µg-LD	WT-1g-LD	3209.55	293.531	3.45078	0.000737696
247573_at	AACT1 (anthocyanin 5-aromatic acyltransferase 1); transferase/ transferase, transferring acyl groups other than amino-acyl groups	AACT1	AT5G61160	WT-µg-LD	WT-1g-LD	2474.33	227.561	3.44272	0.0287624
259746_at	pentatricopeptide repeat-containing protein	AT1G71060	AT1G71060	WT-µg-LD	WT-1g-LD	92.8006	8.5466	3.44071	0.0390375
266462_at	tryptophan-rich sensory protein-like protein	TSPO	AT2G47770	WT-µg-LD	WT-1g-LD	1046.61	96.7325	3.43558	0.0151632
248764_at	NF-YB2 (NUCLEAR FACTOR Y, SUBUNIT B2); transcription factor	NF-YB2	AT5G47640	WT-µg-LD	WT-1g-LD	2211.99	206.139	3.42365	0.0181611
246403_at	pectinacetylesterase family protein	AT1G57590	AT1G57590	WT-µg-LD	WT-1g-LD	61.7591	5.77113	3.41972	0.0532769
246282_at	AAA-type ATPase family protein	AT4G36580	AT4G36580	WT-µg-LD	WT-1g-LD	182.286	17.1572	3.40932	0.0267035
263846_at	SIGF (RNA POLYMERASE SIGMA-SUBUNIT F); DNA binding / DNA-directed RNA polymerase/ sigma factor/ transcription factor	SIGF	AT2G36990	WT-µg-LD	WT-1g-LD	921.133	87.5146	3.39581	0.0129757
252442_at	deoxyuridine 5'-triphosphate nucleotidohydrolase	DUT1	AT3G46940	WT-µg-LD	WT-1g-LD	185.584	17.6532	3.39407	0.0233652
260727_at	polygalacturonase	AT1G48100	AT1G48100	WT-µg-LD	WT-1g-LD	87.3672	8.32259	3.39199	0.0346693
249641_at	DegP10 (DegP protease 10); catalytic/ protein binding / serine-type endopeptidase/ serine-type peptidase	DegP10	AT5G36950	WT-µg-LD	WT-1g-LD	210.42	20.0955	3.38833	0.0307193
246159_at	hypothetical protein	AT5G20935	AT5G20935	WT-µg-LD	WT-1g-LD	358.25	34.2258	3.38781	0.0196978
263679_at	DEAD-box ATP-dependent RNA helicase 22	AT1G59990	AT1G59990	WT-µg-LD	WT-1g-LD	852.827	81.6885	3.38405	0.0235402
261549_at	AT hook motif DNA-binding family protein	AT1G63470	AT1G63470	WT-µg-LD	WT-1g-LD	104.296	10.0325	3.37792	0.0663765
263483_at	CR88; ATP binding	CR88	AT2G04030	WT-µg-LD	WT-1g-LD	1716.59	165.453	3.37506	0.0149455
256751_at	CLC-B (CHLORIDE CHANNEL B); anion channel/ voltage-gated chloride channel	CLC-B	AT3G27170	WT-µg-LD	WT-1g-LD	457.07	44.1477	3.372	0.0396833
256077_at	5'-3' exonuclease family protein	AT1G18090	AT1G18090	WT-µg-LD	WT-1g-LD	118.486	11.532	3.361	0.0299923
249052_at	PDF1.2	PDF1.2	AT5G44420	WT-µg-LD	WT-1g-LD	18195.9	1783.45	3.35087	0.0345782
261191_at	granule-bound starch synthase 1	AT1G32900	AT1G32900	WT-µg-LD	WT-1g-LD	1214.97	119.121	3.35042	0.0407613
249011_at	hypothetical protein	AT5G44670	AT5G44670	WT-µg-LD	WT-1g-LD	177.732	17.4348	3.34966	0.0397066
259672_at	DNA-directed RNA polymerase 1, mitochondrial	MGP3	AT1G68990	WT-µg-LD	WT-1g-LD	286.083	28.0713	3.34927	0.0376718
254831_at	ribosomal protein L7Ae/L30e/S12e/Gadd45 family protein	AT4G12600	AT4G12600	WT-µg-LD	WT-1g-LD	2288.53	224.722	3.3482	0.00992327
255053_at	DEAD-box ATP-dependent RNA helicase 39	RH39	AT4G09730	WT-µg-LD	WT-1g-LD	440.444	43.413	3.34276	0.0287581
246308_at	G4; chlorophyll synthetase	G4	AT3G51820	WT-µg-LD	WT-1g-LD	2123.59	211.659	3.32669	0.0171976
245346_at	CT-BMY (CHLOROPLAST BETA-AMYLASE); beta-amylase	CT-BMY	AT4G17090	WT-µg-LD	WT-1g-LD	16285.5	1628.51	3.32197	0.018322
252265_at	DIN11 (DARK INDUCIBLE 11); iron ion binding / oxidoreductase	DIN11	AT3G49620	WT-µg-LD	WT-1g-LD	1625.21	162.746	3.31993	0.0263369
258055_at	NDF4 (NDH-DEPENDENT CYCLIC ELECTRON FLOW 1); electron carrier/ iron-sulfur cluster binding	NDF4	AT3G16250	WT-µg-LD	WT-1g-LD	263.077	26.3943	3.31719	0.0290854
264118_at	nucleolar complex-associated protein domain-containing protein	AT1G79150	AT1G79150	WT-µg-LD	WT-1g-LD	195.564	19.6451	3.3154	0.0381551
257381_at	RING/FYVE/PHD zinc finger-containing protein	AT2G37950	AT2G37950	WT-µg-LD	WT-1g-LD	1022.5	103.383	3.30602	0.0210089
251586_at	GIS (GLABROUS INFLORESCENCE STEMS); nucleic acid binding / transcription factor/ zinc ion binding	GIS	AT3G58070	WT-µg-LD	WT-1g-LD	164.208	16.6934	3.29818	0.0287069
247585_at	hypothetical protein	AT5G60680	AT5G60680	WT-µg-LD	WT-1g-LD	9441.81	961.323	3.29597	0.0383498
252625_at	HDA3 (HISTONE DEACETYLASE 3); histone deacetylase/ nucleic acid binding / zinc ion binding	HDA3	AT3G44750	WT-µg-LD	WT-1g-LD	923.081	93.9909	3.29586	0.0388882
251935_at	fructokinase-like 1	FLN1	AT3G54090	WT-µg-LD	WT-1g-LD	581.188	59.2755	3.2935	0.0367181
264677_at	HYL1 (HYPONASTIC LEAVES 1); double-stranded RNA binding / miRNA binding / protein binding	HYL1	AT1G09700	WT-µg-LD	WT-1g-LD	163.871	16.8098	3.28519	0.0505675
251031_at	OHP (ONE HELIX PROTEIN)	OHP	AT5G02120	WT-µg-LD	WT-1g-LD	2603.79	268.134	3.27959	0.0211334
246094_at	hypothetical protein	AT5G19300	AT5G19300	WT-µg-LD	WT-1g-LD	217.502	22.4051	3.27913	0.0491412
246199_at	hydrolase, alpha/beta fold family protein	AT4G36530	AT4G36530	WT-µg-LD	WT-1g-LD	988.97	101.948	3.27809	0.0211808
256049_at	shewenella-like protein phosphatase 1	AT1G07010	AT1G07010	WT-µg-LD	WT-1g-LD	1644.99	169.765	3.27647	0.023997
251793_at	regulator of chromosome condensation repeat-containing protein	AT3G55580	AT3G55580	WT-µg-LD	WT-1g-LD	661.274	68.5303	3.27043	0.0108129
253337_at	hda14 (histone deacetylase 14); histone deacetylase	hda14	AT4G33470	WT-µg-LD	WT-1g-LD	889.746	92.5742	3.26471	0.0193711
255088_at	NADH dehydrogenase-like complex T	AT4G09350	AT4G09350	WT-µg-LD	WT-1g-LD	339.17	35.3514	3.26217	0.0161751
258100_at	MATE efflux family protein LAL5	AT3G23550	AT3G23550	WT-µg-LD	WT-1g-LD	5160.13	538.779	3.25964	0.0366056
247853_at	PHOT2 (PHOTOTROPIN 2); FMN binding / blue light photoreceptor/ kinase/ protein serine/threonine kinase	PHOT2	AT5G58140	WT-µg-LD	WT-1g-LD	897.247	93.9037	3.25625	0.0296171
261762_at	pentatricopeptide repeat-containing protein	ECB2	AT1G15510	WT-µg-LD	WT-1g-LD	162.19	17.0053	3.25363	0.00608935
253765_at	hypothetical protein	AT4G28740	AT4G28740	WT-µg-LD	WT-1g-LD	1832.87	193.391	3.24451	0.0141907
257945_at	ASK10 (ARABIDOPSIS SKP1-LIKE 10); protein binding / ubiquitin-protein ligase	ASK10	AT3G21860	WT-µg-LD	WT-1g-LD	41.6399	4.4005	3.24223	0.034854
246651_at	adenylate kinase family protein	AT5G35170	AT5G35170	WT-µg-LD	WT-1g-LD	950.211	101.091	3.23259	0.0120395
258956_at	PsbQ-like protein 1	PQL1	AT3G01440	WT-µg-LD	WT-1g-LD	309.76	33.0206	3.22971	0.016527
247826_at	glucan endo-1,3-beta-glucosidase 9	AT5G58480	AT5G58480	WT-µg-LD	WT-1g-LD	269.712	28.8445	3.22505	0.0347292
246509_at	EMB2247 (embryo defective 2247); ATP binding / aminoacyl-tRNA ligase/ nucleotide binding / valine-tRNA ligase	EMB2247	AT5G16715	WT-µg-LD	WT-1g-LD	381.912	40.8733	3.22401	0.0489082
260824_at	BMS1 domain-containing protein	AT1G06720	AT1G06720	WT-µg-LD	WT-1g-LD	338.072	36.1956	3.22344	0.0238024
245296_at	ATOPT3 (OLIGOPEPTIDE TRANSPORTER); oligopeptide transporter	ATOPT3	AT4G16370	WT-µg-LD	WT-1g-LD	2104.59	225.661	3.22131	0.023959
260984_at	hydroxyproline-rich glycoprotein family protein	AT1G53645	AT1G53645	WT-µg-LD	WT-1g-LD	854.614	91.9591	3.21621	0.0135256
261717_at	BEE1 (BR Enhanced Expression 1); transcription factor	BEE1	AT1G18400	WT-µg-LD	WT-1g-LD	340.563	36.7776	3.21102	0.0352304
256527_at	probable thionin-2.4	AT1G66100	AT1G66100	WT-µg-LD	WT-1g-LD	298.303	32.2194	3.21077	0.0407895
251759_at	ATDFD (A. THALIANA DHFS-FPGS HOMOLOG D); tetrahydrofolylpolyglutamate synthase	ATDFD	AT3G55630	WT-µg-LD	WT-1g-LD	975.534	105.37	3.21074	0.0544288
264041_at	SEP4 (SEPALLATA 4); DNA binding / transcription factor	43712	AT2G03710	WT-µg-LD	WT-1g-LD	267.508	28.8971	3.21058	0.0308767
252468_at	PHS2 (ALPHA-GLUCAN PHOSPHORYLASE 2); phosphorylase/ transferase, transferring glycosyl groups	PHS2	AT3G46970	WT-µg-LD	WT-1g-LD	919.258	100.03	3.20003	0.0158086
258884_at	OMR1 (L-O-METHYLTHREONINE RESISTANT 1); L-threonine ammonia-lyase	OMR1	AT3G10050	WT-µg-LD	WT-1g-LD	750.582	81.7351	3.19898	0.0496698
254623_at	CHLI1; ATPase/ magnesium chelatase	CHLI1	AT4G18480	WT-µg-LD	WT-1g-LD	2570.4	280.185	3.19754	0.00708406
246435_at	hypothetical protein	AT5G17460	AT5G17460	WT-µg-LD	WT-1g-LD	375.702	41.0225	3.1951	0.0224988
264315_at	polygalacturonase 2	PG2	AT1G70370	WT-µg-LD	WT-1g-LD	1711.83	186.989	3.19451	0.0221499
261301_at	zinc finger (Ran-binding) domain-containing protein	AT1G48570	AT1G48570	WT-µg-LD	WT-1g-LD	668.914	73.3242	3.18946	0.0063943
261439_at	hypothetical protein	AT1G28395	AT1G28395	WT-µg-LD	WT-1g-LD	882.299	97.3618	3.17984	0.0119111
261218_at	FNR2 (FERREDOXIN-NADP(+)-OXIDOREDUCTASE 2); NADPH dehydrogenase/ oxidoreductase/ poly(U) binding	FNR2	AT1G20020	WT-µg-LD	WT-1g-LD	5514.03	608.596	3.17955	0.0392848
254835_s_at	CYP706A5; electron carrier/ heme binding / iron ion binding / monooxygenase/ oxygen binding	CYP706A5	AT4G12310 /// AT4G12320	WT-µg-LD	WT-1g-LD	1309.78	145.687	3.16838	0.0236829
247938_at	PAP28 (PURPLE ACID PHOSPHATASE 28); acid phosphatase/ protein serine/threonine phosphatase	PAP28	AT5G57140	WT-µg-LD	WT-1g-LD	50.1858	5.58285	3.1682	0.423116
264069_at	CPN60A (CHAPERONIN-60ALPHA); ATP binding / protein binding	CPN60A	AT2G28000	WT-µg-LD	WT-1g-LD	2236.54	249.076	3.16661	0.0160251
264185_at	thylakoid lumen protein 18.3	TLP18.3	AT1G54780	WT-µg-LD	WT-1g-LD	5098.54	568.584	3.16464	0.0438093
254075_at	CBF2 (C-REPEAT/DRE BINDING FACTOR 2); DNA binding / transcription activator/ transcription factor	CBF2	AT4G25470	WT-µg-LD	WT-1g-LD	6961.92	778.825	3.16011	0.0406668
251800_at	RBL (REBELOTE)	RBL	AT3G55510	WT-µg-LD	WT-1g-LD	468.871	52.5088	3.15856	0.0239752
260783_at	ORA59 (OCTADECANOID-RESPONSIVE ARABIDOPSIS AP2/ERF 59); DNA binding / transcription activator/ transcription factor	ORA59	AT1G06160	WT-µg-LD	WT-1g-LD	316.761	35.5093	3.15712	0.0245138
258180_at	BRCT domain-containing DNA repair protein	AT3G21480	AT3G21480	WT-µg-LD	WT-1g-LD	62.3046	7.03234	3.14726	0.0517975
251154_at	ATIPT3 (ARABIDOPSIS THALIANA ISOPENTENYLTRANSFERASE 3); ATP binding / tRNA isopentenyltransferase/ transferase, transferring alkyl or aryl (other than methyl) groups	ATIPT3	AT3G63110	WT-µg-LD	WT-1g-LD	416.118	47.0159	3.14577	0.0460775
249354_at	EMB3012 (embryo defective 3012)	EMB3012	AT5G40480	WT-µg-LD	WT-1g-LD	411.661	46.8871	3.13419	0.0342097
267474_at	WHY3 (WHIRLY 3); DNA binding	WHY3	AT2G02740	WT-µg-LD	WT-1g-LD	220.94	25.182	3.13319	0.00372952
247676_at	ribonuclease P subunit Rpp30	AT5G59980	AT5G59980	WT-µg-LD	WT-1g-LD	138.613	15.8299	3.13034	0.0486019
251727_at	hypothetical protein	AT3G56290	AT3G56290	WT-µg-LD	WT-1g-LD	2285.3	262.414	3.12247	0.0164638
260107_at	pfkB-like carbohydrate kinase family protein	AT1G66430	AT1G66430	WT-µg-LD	WT-1g-LD	202.209	23.2239	3.12216	0.0211408
248190_at	calcium-binding endonuclease/exonuclease/phosphatase family protein	AT5G54130	AT5G54130	WT-µg-LD	WT-1g-LD	766.268	88.0324	3.12174	0.0268951
255623_at	50S ribosomal protein L5	AT4G01310	AT4G01310	WT-µg-LD	WT-1g-LD	2666.41	306.917	3.11898	0.00515417
259432_at	transcription factor ASG4	AT1G01520	AT1G01520	WT-µg-LD	WT-1g-LD	247.328	28.4838	3.11821	0.0298852
245793_at	NAD(P)-binding Rossmann-fold-containing protein	AT1G32220	AT1G32220	WT-µg-LD	WT-1g-LD	1048.05	120.903	3.11578	0.0179873
248962_at	FK506-binding protein 1 (FKBP13)	FKBP13	AT5G45680	WT-µg-LD	WT-1g-LD	1052.54	122.196	3.10661	0.0167164
256797_at	DEAD-box ATP-dependent RNA helicase 51	AT3G18600	AT3G18600	WT-µg-LD	WT-1g-LD	925.42	108.135	3.09727	0.0132405
246027_at	glyceraldehyde-3-phosphate dehydrogenase-like protein	AT5G21060	AT5G21060	WT-µg-LD	WT-1g-LD	427.129	49.9147	3.09714	0.0332739
265305_at	tyrosine decarboxylase 1	AT2G20340	AT2G20340	WT-µg-LD	WT-1g-LD	268.335	31.3984	3.09527	0.0296353
249007_at	protein CHLOROPLAST PROTEIN-ENHANCING STRESS TOLERANCE	CEST	AT5G44650	WT-µg-LD	WT-1g-LD	1414.3	165.605	3.09427	0.0209014
265614_at	PNAS-3 related protein	AT2G25355	AT2G25355	WT-µg-LD	WT-1g-LD	311.383	36.481	3.09347	0.0280564
255028_at	PMP (PUTATIVE TYPE 1 MEMBRANE PROTEIN)	PMP	AT4G09890	WT-µg-LD	WT-1g-LD	344.352	40.4356	3.09018	0.00482059
245506_at	monothiol glutaredoxin-S3	AT4G15700	AT4G15700	WT-µg-LD	WT-1g-LD	533.884	62.8408	3.08675	0.0549296
267294_at	YCF37 (Arabidopsis homolog of Synechocystis YCF37)	YCF37	AT2G23670	WT-µg-LD	WT-1g-LD	1663.85	196.176	3.08431	0.0158814
258545_at	nucleolar GTP-binding protein NSN1	AT3G07050	AT3G07050	WT-µg-LD	WT-1g-LD	907.674	107.094	3.0833	0.0170204
251432_at	LETM1-like protein	AT3G59820	AT3G59820	WT-µg-LD	WT-1g-LD	650.261	77.0665	3.07684	0.0134289
252130_at	PSBO2 (PHOTOSYSTEM II SUBUNIT O-2); oxygen evolving/ poly(U) binding	PSBO2	AT3G50820	WT-µg-LD	WT-1g-LD	4406.88	523.342	3.07393	0.052855
253607_at	small nuclear ribonucleoprotein E	AT4G30330	AT4G30330	WT-µg-LD	WT-1g-LD	262.595	31.2038	3.07305	0.0256207
260146_at	phototropic-responsive NPH3 family protein	AT1G52770	AT1G52770	WT-µg-LD	WT-1g-LD	133.606	15.918	3.06925	0.0421967
254980_at	60S ribosomal protein L9-2	AT4G10450	AT4G10450	WT-µg-LD	WT-1g-LD	2351.49	280.378	3.06813	0.0107572
252281_at	Metal-dependent protein hydrolase	AT3G49320	AT3G49320	WT-µg-LD	WT-1g-LD	90.5918	10.8184	3.0659	0.0589323
255447_at	GTP-binding protein	AT4G02790	AT4G02790	WT-µg-LD	WT-1g-LD	390.084	46.676	3.06303	0.0206374
264913_at	pentatricopeptide repeat-containing protein	AT1G60770	AT1G60770	WT-µg-LD	WT-1g-LD	419.221	50.2552	3.06037	0.0172407
257856_at	Lojap-related protein	AT3G12930	AT3G12930	WT-µg-LD	WT-1g-LD	488.942	58.7441	3.05715	0.0328862
261168_at	TIC20 (TRANSLOCON AT THE INNER ENVELOPE MEMBRANE OF CHLOROPLASTS 20)	TIC20	AT1G04945	WT-µg-LD	WT-1g-LD	261.34	31.4126	3.05651	0.00804402
249975_s_at	ribosomal protein L33 family protein /// ribosomal protein L33 family protein	AT3G06320 /// AT5G18790	AT3G06320 /// AT5G18790	WT-µg-LD	WT-1g-LD	475.255	57.2319	3.05381	0.0170793
245354_at	LIL3:1; transcription factor	LIL3:1	AT4G17600	WT-µg-LD	WT-1g-LD	1504.81	181.693	3.05	0.00104329
248128_at	THI1; protein homodimerization	THI1	AT5G54770	WT-µg-LD	WT-1g-LD	17682.4	2144.78	3.04341	0.0113743
258929_at	peptidyl-prolyl cis-trans isomerase FKBP16-4	AT3G10060	AT3G10060	WT-µg-LD	WT-1g-LD	936.811	113.808	3.04116	0.0123573
258076_at	RPL15; structural constituent of ribosome	RPL15	AT3G25920	WT-µg-LD	WT-1g-LD	1962.68	238.779	3.03908	0.0078874
259537_at	PHR1 (PHOTOLYASE 1); DNA photolyase	PHR1	AT1G12370	WT-µg-LD	WT-1g-LD	127.365	15.5157	3.03716	0.00816783
261309_at	CPuORF31 (Conserved peptide upstream open reading frame 31)	CPuORF31	AT1G48598 /// AT1G48600	WT-µg-LD	WT-1g-LD	478.833	58.4304	3.03473	0.031032
249685_at	CCB3 (COFACTOR ASSEMBLY, COMPLEX C (B6F),)	CCB3	AT5G36120	WT-µg-LD	WT-1g-LD	182.744	22.4461	3.02529	0.0179672
247235_at	AAA-type ATPase family protein	AT5G64580	AT5G64580	WT-µg-LD	WT-1g-LD	147.632	18.1518	3.02383	0.0412002
257365_x_at	PDF1.2b (plant defensin 1.2b)	PDF1.2b	AT2G26020	WT-µg-LD	WT-1g-LD	17498.8	2155.87	3.02091	0.021682
261407_at	protein phytochrome kinase substrate 3	AT1G18810	AT1G18810	WT-µg-LD	WT-1g-LD	355.672	43.8718	3.01918	0.0361631
249769_at	SIGE (SIGMA FACTOR E); DNA binding / DNA-directed RNA polymerase/ sigma factor/ transcription factor	SIGE	AT5G24120	WT-µg-LD	WT-1g-LD	1652.88	203.987	3.01843	0.0162661
252463_at	hypothetical protein	AT3G47070	AT3G47070	WT-µg-LD	WT-1g-LD	5498.73	678.658	3.01834	0.0481288
262526_at	SPS2 (Solanesyl diphosphate synthase 2); trans-octaprenyltranstransferase	SPS2	AT1G17050	WT-µg-LD	WT-1g-LD	1156.03	142.769	3.01742	0.0141499
251193_at	APG3 (ALBINO AND PALE GREEN); translation release factor/ translation release factor, codon specific	APG3	AT3G62910	WT-µg-LD	WT-1g-LD	601.033	74.3048	3.01592	0.0117567
252502_at	COPT2; copper ion transmembrane transporter/ high affinity copper ion transmembrane transporter	COPT2	AT3G46900	WT-µg-LD	WT-1g-LD	616.526	76.3511	3.01344	0.0172237
263255_at	hypothetical protein	AT1G10490	AT1G10490	WT-µg-LD	WT-1g-LD	247.345	30.6393	3.01307	0.00882969
259791_at	metallo-beta-lactamase domain-containing protein	AT1G29700	AT1G29700	WT-µg-LD	WT-1g-LD	492.589	61.1507	3.00994	0.0532482
263755_at	MATE efflux family protein	AT2G21340	AT2G21340	WT-µg-LD	WT-1g-LD	518.253	64.3613	3.00939	0.0287754
256060_at	CCT motif family protein	AT1G07050	AT1G07050	WT-µg-LD	WT-1g-LD	51.7125	6.42563	3.0086	0.0741899
258997_at	hypothetical protein	AT3G01810	AT3G01810	WT-µg-LD	WT-1g-LD	246.963	30.8887	2.99914	0.0257584
253598_at	40S ribosomal protein S11-2	AT4G30800	AT4G30800	WT-µg-LD	WT-1g-LD	193.411	24.2498	2.99563	0.033396
264435_at	ATGSTU18 (GLUTATHIONE S-TRANSFERASE TAU 18); glutathione transferase	ATGSTU18	AT1G10360	WT-µg-LD	WT-1g-LD	715.993	89.8765	2.99393	0.0345935
253966_at	fructose-bisphosphate aldolase 7	AT4G26520	AT4G26520	WT-µg-LD	WT-1g-LD	123.003	15.5046	2.98793	0.0401332
251355_at	putative endonuclease / glycosyl hydrolase	AT3G61100	AT3G61100	WT-µg-LD	WT-1g-LD	564.101	71.1152	2.98773	0.00281559
263750_at	SMAD/FHA domain-containing protein	AT2G21530	---	WT-µg-LD	WT-1g-LD	651.721	82.3746	2.98398	0.0145883
248984_at	NRPC2; DNA binding / DNA-directed RNA polymerase/ ribonucleoside binding	NRPC2	AT5G45140	WT-µg-LD	WT-1g-LD	220.057	27.8923	2.97993	0.0363563
260331_at	pentatricopeptide repeat-containing protein	PPR596	AT1G80270	WT-µg-LD	WT-1g-LD	387.392	49.1308	2.9791	0.031624
258155_at	RACK1C_AT (RECEPTOR FOR ACTIVATED C KINASE 1 C); nucleotide binding	RACK1C_AT	AT3G18130	WT-µg-LD	WT-1g-LD	2206.54	281.036	2.97296	0.00579161
259460_at	hypothetical protein	AT1G44000	AT1G44000	WT-µg-LD	WT-1g-LD	2024.53	258.18	2.97114	0.00896016
261456_at	hypothetical protein	AT1G21050	AT1G21050	WT-µg-LD	WT-1g-LD	2663.02	340.392	2.96779	0.0226377
250196_at	polyribonucleotide nucleotidyltransferase	AT5G14580	AT5G14580	WT-µg-LD	WT-1g-LD	101.56	12.9837	2.96756	0.0586787
249230_at	hypothetical protein	AT5G42070	AT5G42070	WT-µg-LD	WT-1g-LD	566.195	72.4963	2.96532	0.00340272
263847_at	UDP-glycosyltransferase 86A1	AT2G36970	AT2G36970	WT-µg-LD	WT-1g-LD	858.864	110.109	2.96349	0.00818483
250095_at	phytoene synthase	PSY	AT5G17230	WT-µg-LD	WT-1g-LD	3628.21	466.541	2.95918	0.00640679
256299_at	ATEXPA1 (ARABIDOPSIS THALIANA EXPANSIN A1)	ATEXPA1	AT1G69530	WT-µg-LD	WT-1g-LD	826.277	106.526	2.95542	0.0369652
249710_at	GS2 (GLUTAMINE SYNTHETASE 2); glutamate-ammonia ligase	GS2	AT5G35630	WT-µg-LD	WT-1g-LD	7843.86	1013.13	2.95275	0.0326456
252272_at	BAM2 (BARELY ANY MERISTEM 2); ATP binding / protein binding / protein kinase/ protein serine/threonine kinase	BAM2	AT3G49670	WT-µg-LD	WT-1g-LD	135.617	17.534	2.95131	0.0295515
257517_at	hypothetical protein	AT3G16330	AT3G16330	WT-µg-LD	WT-1g-LD	221.968	28.746	2.94892	0.0129838
257057_at	---	---	AT3G15310	WT-µg-LD	WT-1g-LD	184.493	23.9439	2.94584	0.0222822
256514_at	NAD(P)-binding Rossmann-fold superfamily protein	AT1G66130	AT1G66130	WT-µg-LD	WT-1g-LD	1105.51	143.6	2.94459	0.0138213
261296_at	hypothetical protein	AT1G48460	AT1G48460	WT-µg-LD	WT-1g-LD	344.18	44.842	2.94024	0.0340118
254687_at	CYP83A1 (CYTOCHROME P450 83A1); oxidoreductase, acting on paired donors, with incorporation or reduction of molecular oxygen, NADH or NADPH as one donor, and incorporation of one atom of oxygen / oxygen binding	CYP83A1	AT4G13770	WT-µg-LD	WT-1g-LD	1066.27	139.537	2.93386	0.0292544
250546_at	H/ACA ribonucleoprotein complex subunit 2-like protein	AT5G08180	AT5G08180	WT-µg-LD	WT-1g-LD	836.228	109.612	2.93149	0.0290908
255436_at	hypothetical protein	AT4G03150	AT4G03150	WT-µg-LD	WT-1g-LD	306.171	40.352	2.92363	0.0186358
257487_at	ubiquitin carboxyl-terminal hydrolase family protein	AT1G71850	AT1G71850	WT-µg-LD	WT-1g-LD	126.967	16.805	2.91749	0.0375375
253174_at	CAT2 (CATALASE 2); catalase	CAT2	AT4G35090	WT-µg-LD	WT-1g-LD	14567.5	1931.88	2.91467	0.0431787
266801_at	EMB2001 (embryo defective 2001); GTP binding	EMB2001	AT2G22870	WT-µg-LD	WT-1g-LD	596.055	79.2586	2.91081	0.0136775
258139_at	AT-HSFC1; DNA binding / transcription factor	HSFC1	AT3G24520	WT-µg-LD	WT-1g-LD	1408.58	187.989	2.90552	0.026055
247694_at	monofunctional riboflavin biosynthesis protein RIBA 3	AT5G59750	AT5G59750	WT-µg-LD	WT-1g-LD	1800.19	240.302	2.90523	0.0168316
258804_at	pentatricopeptide repeat-containing protein	AT3G04760	AT3G04760	WT-µg-LD	WT-1g-LD	1284.6	171.868	2.90194	0.0191729
253283_at	hypothetical protein	AT4G34090	AT4G34090	WT-µg-LD	WT-1g-LD	404.882	54.403	2.89574	0.0491374
255763_at	hypothetical protein	UP6	AT1G16730	WT-µg-LD	WT-1g-LD	242.396	32.5923	2.89476	0.0242586
251218_at	CP12-2; protein binding	CP12-2	AT3G62410	WT-µg-LD	WT-1g-LD	8322.04	1123.78	2.88858	0.0169861
260596_at	TIM50	TIM50	AT1G55900	WT-µg-LD	WT-1g-LD	785.584	106.311	2.88548	0.0488926
259903_at	hypothetical protein	AT1G74160	AT1G74160	WT-µg-LD	WT-1g-LD	187.796	25.4651	2.88257	0.0306448
246809_s_at	putative SAR DNA-binding protein /// NOP56-like pre RNA processing ribonucleoprotein	AT5G27120 /// AT5G27140	AT5G27120 /// AT5G27140	WT-µg-LD	WT-1g-LD	863.687	117.775	2.87448	0.0196515
264959_at	Mog1/PsbP/DUF1795-like photosystem II reaction center PsbP family protein	AT1G77090	AT1G77090	WT-µg-LD	WT-1g-LD	991.138	135.312	2.87279	0.00858799
266253_at	HDT4; histone deacetylase	HDT4	AT2G27840	WT-µg-LD	WT-1g-LD	595.31	81.6409	2.86628	0.0545247
253412_at	CBL10 (CALCINEURIN B-LIKE 10); calcium ion binding	CBL10	AT4G33000	WT-µg-LD	WT-1g-LD	273.335	37.4908	2.86606	0.0379543
247816_at	NADH dehydrogenase-like complex N	AT5G58260	AT5G58260	WT-µg-LD	WT-1g-LD	599.163	82.198	2.86577	0.0116152
262211_at	ORA47; DNA binding / transcription factor	ORA47	AT1G74930	WT-µg-LD	WT-1g-LD	2590.12	355.391	2.86554	0.00856603
258404_at	RPL3P (RIBOSOMAL PROTEIN L3 PLASTID); structural constituent of ribosome	RPL3P	AT3G17465	WT-µg-LD	WT-1g-LD	927.522	127.282	2.86535	0.0105584
261898_at	mitochondrial glycoprotein family protein	AT1G80720	AT1G80720	WT-µg-LD	WT-1g-LD	95.052	13.0736	2.86206	0.0257289
262304_at	MLP43 (MLP-LIKE PROTEIN 43)	MLP43	AT1G70890	WT-µg-LD	WT-1g-LD	151.338	20.902	2.85606	0.0225248
247046_at	hypothetical protein	AT5G66540	AT5G66540	WT-µg-LD	WT-1g-LD	371.755	51.4245	2.85383	0.0228748
263760_at	SULA; binding / catalytic/ coenzyme binding	SULA	AT2G21280	WT-µg-LD	WT-1g-LD	1015.75	140.643	2.85243	0.018561
245891_at	AAP2 (AMINO ACID PERMEASE 2); amino acid transmembrane transporter	AAP2	AT5G09220	WT-µg-LD	WT-1g-LD	3406.35	472.503	2.84983	0.0353847
248828_at	chlorophyll A-B binding family protein	AT5G47110	AT5G47110	WT-µg-LD	WT-1g-LD	3764.64	524.423	2.84371	0.0224689
263477_at	UDP-glycosyltransferase 74C1	AT2G31790	AT2G31790	WT-µg-LD	WT-1g-LD	367.15	51.1842	2.8426	0.0314334
254564_at	NCED4 (NINE-CIS-EPOXYCAROTENOID DIOXYGENASE 4)	NCED4	AT4G19170	WT-µg-LD	WT-1g-LD	1122.65	156.915	2.83885	0.0193994
251029_at	mitochondrial glycoprotein family protein	AT5G02050	AT5G02050	WT-µg-LD	WT-1g-LD	719.771	100.865	2.83511	0.0219956
250074_at	UTP--glucose-1-phosphate uridylyltransferase 1	UGP2	AT5G17310	WT-µg-LD	WT-1g-LD	1280.92	179.938	2.83161	0.0129751
260585_at	EMB2777 (EMBRYO DEFECTIVE 2777)	EMB2777	AT2G43650	WT-µg-LD	WT-1g-LD	235.716	33.1828	2.82855	0.013358
248402_at	crr1 (chlororespiration reduction 1); dihydrodipicolinate reductase	crr1	AT5G52100	WT-µg-LD	WT-1g-LD	264.463	37.2706	2.82696	0.0293295
258369_at	ATPME3; pectinesterase	ATPME3	AT3G14310	WT-µg-LD	WT-1g-LD	3090.33	436.083	2.82508	0.00150079
261608_at	probable carboxylesterase 4	AT1G49650	AT1G49650	WT-µg-LD	WT-1g-LD	248.243	35.0865	2.82277	0.0236792
266279_at	tropinone reductase-like protein	AT2G29290	AT2G29290	WT-µg-LD	WT-1g-LD	656.876	93.3764	2.81449	0.0281792
251305_at	peptidyl-prolyl cis-trans isomerase, chloroplast / cyclophilin / rotamase / cyclosporin A-binding protein (ROC4)	ROC4	AT3G62030	WT-µg-LD	WT-1g-LD	4843.26	689.722	2.81189	0.0236656
253197_at	Rossmann-fold NAD(P)-binding domain-containing protein	AT4G35250	AT4G35250	WT-µg-LD	WT-1g-LD	2098.22	299.742	2.80737	0.0145269
259690_at	replication factor C 2	RFC2	AT1G63160	WT-µg-LD	WT-1g-LD	241.809	34.5498	2.80712	0.0168427
257706_at	acid phosphatase/vanadium-dependent haloperoxidase-related protein	AT3G12685	AT3G12685	WT-µg-LD	WT-1g-LD	194.396	27.7784	2.80697	0.018702
255676_at	BAM2 (BETA-AMYLASE 2); beta-amylase	BAM2	AT4G00490	WT-µg-LD	WT-1g-LD	999.434	143.334	2.80173	0.0297852
264217_at	U-box domain-containing protein 19	AT1G60190	AT1G60190	WT-µg-LD	WT-1g-LD	10440.5	1498.69	2.80042	0.0276379
263169_at	phototropic-responsive NPH3 family protein	AT1G03010	AT1G03010	WT-µg-LD	WT-1g-LD	81.9532	11.7863	2.79769	0.0596013
262903_at	putative aldo/keto reductase	AT1G59950	AT1G59950	WT-µg-LD	WT-1g-LD	80.1964	11.5398	2.79692	0.0679586
259602_at	TIR-NBS-LRR class disease resistance protein	AT1G56520	AT1G56520	WT-µg-LD	WT-1g-LD	127.824	18.4094	2.79564	0.0486222
251667_at	NAP57 (Arabidopsis thaliana homologue of NAP57); pseudouridine synthase	NAP57	AT3G57150	WT-µg-LD	WT-1g-LD	2258.84	325.333	2.79559	0.0407353
260266_at	zinc finger protein CONSTANS-LIKE 6	AT1G68520	AT1G68520	WT-µg-LD	WT-1g-LD	3381.71	488.07	2.79259	0.0225016
247131_at	FNR1 (FERREDOXIN-NADP(+)-OXIDOREDUCTASE 1); NADPH dehydrogenase/ electron transporter, transferring electrons within the cyclic electron transport pathway of photosynthesis/ electron transporter, transferring electrons within the noncyclic electron transp	FNR1	AT5G66190	WT-µg-LD	WT-1g-LD	3954.43	570.886	2.7922	0.00113137
248891_at	DNA replication licensing factor, putative	MCM3	AT5G46280	WT-µg-LD	WT-1g-LD	125.657	18.1495	2.79149	0.031402
263980_at	Peroxisomal membrane 22 kDa (Mpv17/PMP22) family protein	AT2G42770	AT2G42770	WT-µg-LD	WT-1g-LD	982.728	141.947	2.79144	0.0262106
264201_at	hypothetical protein	AT1G22630	AT1G22630	WT-µg-LD	WT-1g-LD	634.743	91.9541	2.78719	0.0151312
263712_at	NFD6 (NUCLEAR FUSION DEFECTIVE 6)	NFD6	AT2G20585	WT-µg-LD	WT-1g-LD	333.534	48.3242	2.78701	0.0244525
266719_at	CCA1 (CIRCADIAN CLOCK ASSOCIATED 1); DNA binding / transcription activator/ transcription factor/ transcription repressor	CCA1	AT2G46830	WT-µg-LD	WT-1g-LD	5800.46	841.012	2.78597	0.0033055
265959_at	Thioredoxin superfamily protein	AT2G37240	AT2G37240	WT-µg-LD	WT-1g-LD	1295.18	188.173	2.78303	0.0479277
251301_at	CYP78A9 (CYTOCHROME P450 78A9); monooxygenase/ oxygen binding	CYP78A9	AT3G61880	WT-µg-LD	WT-1g-LD	310.217	45.1303	2.78111	0.0294582
257253_at	ABC1 protein kinase 6	AT3G24190	AT3G24190	WT-µg-LD	WT-1g-LD	1864.33	271.492	2.77968	0.0324182
259083_at	ATNEK2 (NIMA-RELATED KINASE 2); ATP binding / kinase/ protein kinase/ protein serine/threonine kinase	ATNEK2	AT3G04810	WT-µg-LD	WT-1g-LD	89.1838	13.1153	2.76553	0.0261665
246019_at	pentatricopeptide repeat-containing protein	AT5G10690	AT5G10690	WT-µg-LD	WT-1g-LD	229.164	33.7167	2.76485	0.0284998
266857_at	sodium/pyruvate cotransporter BASS2	AT2G26900	AT2G26900	WT-µg-LD	WT-1g-LD	993.911	146.891	2.75837	0.00907377
262612_at	photosynthetic NDH subcomplex L2	PQL2	AT1G14150	WT-µg-LD	WT-1g-LD	1024.9	151.499	2.75811	0.0147271
266932_s_at	putative DEAD-box ATP-dependent RNA helicase 48 /// putative DEAD-box ATP-dependent RNA helicase 33	AT1G63250 /// AT2G07750	AT1G63250 /// AT2G07750	WT-µg-LD	WT-1g-LD	127.386	18.8592	2.75587	0.04415
247977_at	hypothetical protein	AT5G56850	AT5G56850	WT-µg-LD	WT-1g-LD	325.124	48.1479	2.75545	0.0173773
250686_at	SPC98 (SPINDLE POLE BODY COMPONENT 98); tubulin binding	SPC98	AT5G06680	WT-µg-LD	WT-1g-LD	79.4857	11.8078	2.75096	0.0306202
259444_at	pentatricopeptide repeat-containing protein	AT1G02370	AT1G02370	WT-µg-LD	WT-1g-LD	203.785	30.4021	2.74481	0.033512
256752_at	S-adenosylmethionine-dependent methyltransferase-domain containing protein	AT3G27180	AT3G27180	WT-µg-LD	WT-1g-LD	318.692	47.57	2.74404	0.0366093
246850_at	LON1 (LON PROTEASE 1); ATP binding / ATP-dependent peptidase/ serine-type peptidase	LON1	AT5G26860	WT-µg-LD	WT-1g-LD	265.959	39.7055	2.74379	0.032807
257831_at	CCB1 (COFACTOR ASSEMBLY OF COMPLEX C)	CCB1	AT3G26710	WT-µg-LD	WT-1g-LD	1796.14	268.823	2.74017	0.00209086
263488_at	mesophyll-cell RNAi library line 7-like protein	AT2G31840	AT2G31840	WT-µg-LD	WT-1g-LD	301.339	45.1536	2.73847	0.019561
262645_at	SCO1 (SNOWY COTYLEDON 1); ATP binding / translation elongation factor/ translation factor, nucleic acid binding	SCO1	AT1G62750	WT-µg-LD	WT-1g-LD	6563.6	985.055	2.73621	0.000185835
247741_at	GIL1 (GRAVITROPIC IN THE LIGHT)	GIL1	AT5G58960	WT-µg-LD	WT-1g-LD	252.107	37.8648	2.73511	0.0183772
252441_at	PTAC16 (PLASTID TRANSCRIPTIONALLY ACTIVE 16); binding / catalytic	PTAC16	AT3G46780	WT-µg-LD	WT-1g-LD	1030.87	154.907	2.73439	0.0147373
255764_at	HCF173 (high chlorophyll fluorescence phenotype 173); binding / catalytic/ transcription repressor	HCF173	AT1G16720	WT-µg-LD	WT-1g-LD	2822.66	424.286	2.73395	0.0148494
249900_at	emb1211 (embryo defective 1211)	emb1211	AT5G22640	WT-µg-LD	WT-1g-LD	642.955	96.8874	2.73034	0.0161229
267562_at	radical SAM domain-containing protein	AT2G39670	AT2G39670	WT-µg-LD	WT-1g-LD	640.301	96.543	2.72951	0.036612
262094_at	NOP56 (Arabidopsis homolog of nucleolar protein Nop56)	NOP56	AT1G56110	WT-µg-LD	WT-1g-LD	2078.13	313.494	2.72877	0.0127187
258800_at	hypothetical protein	AT3G04550	AT3G04550	WT-µg-LD	WT-1g-LD	734.075	110.793	2.72805	0.0334689
254390_at	CPK15; ATP binding / calcium ion binding / calmodulin-dependent protein kinase/ kinase/ protein kinase/ protein serine/threonine kinase	CPK15	AT4G21940	WT-µg-LD	WT-1g-LD	497.514	75.1506	2.72688	0.0289334
254485_at	Rossmann-fold NAD(P)-binding domain-containing protein	AT4G20760	AT4G20760	WT-µg-LD	WT-1g-LD	228.227	34.4963	2.72596	0.0332912
264745_at	APR2 (5'ADENYLYLPHOSPHOSULFATE REDUCTASE 2); adenylyl-sulfate reductase/ phosphoadenylyl-sulfate reductase (thioredoxin)	43557	AT1G62180	WT-µg-LD	WT-1g-LD	2750.58	416.255	2.72419	0.0150798
266570_at	ribosomal protein L35	AT2G24090	AT2G24090	WT-µg-LD	WT-1g-LD	1489.57	226.444	2.71767	0.0129056
254810_at	PME1 (PECTIN METHYLESTERASE INHIBITOR 1); enzyme inhibitor/ pectinesterase/ pectinesterase inhibitor	PME1	AT4G12390	WT-µg-LD	WT-1g-LD	1084.98	164.948	2.71758	0.0326396
253218_at	SLP2; serine-type peptidase	SLP2	AT4G34980	WT-µg-LD	WT-1g-LD	544.454	82.8172	2.71681	0.0481131
266291_at	tropinone reductase-like protein	AT2G29320	AT2G29320	WT-µg-LD	WT-1g-LD	544.964	82.9205	2.71636	0.0395393
256288_at	PRMT3 (PROTEIN ARGININE METHYLTRANSFERASE 3); methyltransferase/ zinc ion binding	PRMT3	AT3G12270	WT-µg-LD	WT-1g-LD	403.01	61.3214	2.71635	0.027189
252116_at	hypothetical protein	AT3G51510	AT3G51510	WT-µg-LD	WT-1g-LD	1598.43	243.228	2.71627	0.0276769
251538_at	ribosomal protein L1p/L10e family protein	AT3G58660	AT3G58660	WT-µg-LD	WT-1g-LD	507.781	77.3178	2.71534	0.00400421
255440_at	chloroplast thylakoid lumen protein	AT4G02530	AT4G02530	WT-µg-LD	WT-1g-LD	2345.68	357.912	2.71233	0.0293092
258585_at	emb2458 (embryo defective 2458); ATP binding / ATPase/ metalloendopeptidase/ nucleoside-triphosphatase/ nucleotide binding	emb2458	AT3G04340	WT-µg-LD	WT-1g-LD	146.773	22.3963	2.71226	0.0352592
248242_at	pyridoxal reductase	AT5G53580	AT5G53580	WT-µg-LD	WT-1g-LD	731.78	111.682	2.71201	0.0386841
249875_at	HCF136; protein binding	HCF136	AT5G23120	WT-µg-LD	WT-1g-LD	2935.12	449.257	2.70781	0.0189762
253492_at	ATP-dependent caseinolytic (Clp) protease/crotonase family protein	AT4G31810	AT4G31810	WT-µg-LD	WT-1g-LD	372.218	57.2062	2.70191	0.0373296
247232_at	ATATH13; transporter	ATH13	AT5G64940	WT-µg-LD	WT-1g-LD	2307.35	355.148	2.69974	0.0354533
248762_at	hypothetical protein	AT5G47455	AT5G47455	WT-µg-LD	WT-1g-LD	233.768	35.9915	2.69935	0.0250018
264932_at	hypothetical protein	AT1G61240	AT1G61240	WT-µg-LD	WT-1g-LD	122.178	18.8138	2.69912	0.0263623
262175_at	NDH-O (NAD(P)H:plastoquinone dehydrogenase complex subunit O)	NDH-O	AT1G74880	WT-µg-LD	WT-1g-LD	1281.67	197.795	2.69594	0.0124833
264357_at	ATRRP4 (ARABIDOPSIS THALIANA RIBOSOMAL RNA PROCESSING 4); RNA binding / exonuclease	ATRRP4	AT1G03360	WT-µg-LD	WT-1g-LD	243.368	37.7096	2.69013	0.00750503
253048_at	acetamidase/formamidase family protein	AT4G37560	AT4G37560	WT-µg-LD	WT-1g-LD	1952.41	302.932	2.68818	0.0150939
259258_at	Rubisco methyltransferase family protein	AT3G07670	AT3G07670	WT-µg-LD	WT-1g-LD	646.328	100.397	2.68654	0.00326506
255304_at	KEA3; potassium ion transmembrane transporter/ potassium:hydrogen antiporter	KEA3	AT4G04850	WT-µg-LD	WT-1g-LD	503.824	78.3681	2.68458	0.0480457
252654_at	Class II aaRS and biotin synthetases superfamily protein	AT3G44740	AT3G44740	WT-µg-LD	WT-1g-LD	134.97	21.0434	2.68119	0.0217006
262617_at	POR C (PROTOCHLOROPHYLLIDE OXIDOREDUCTASE); NADPH dehydrogenase/ oxidoreductase/ protochlorophyllide reductase	POR C	AT1G06590	WT-µg-LD	WT-1g-LD	149.384	23.3887	2.67514	0.0297301
262943_at	inosine-5'-monophosphate dehydrogenase	AT1G79470	AT1G79470	WT-µg-LD	WT-1g-LD	379.237	59.3922	2.67476	0.0241951
248854_at	pentatricopeptide repeat-containing protein	AT5G46580	AT5G46580	WT-µg-LD	WT-1g-LD	508.435	79.6583	2.67417	0.0174579
246490_at	CPuORF10 (Conserved peptide upstream open reading frame 10)	CPuORF10	AT5G15948 /// AT5G15950	WT-µg-LD	WT-1g-LD	6146.26	965.319	2.67063	0.0214182
266865_at	FAD3 (FATTY ACID DESATURASE 3); omega-3 fatty acid desaturase	FAD3	AT2G29980	WT-µg-LD	WT-1g-LD	894.375	140.499	2.67032	0.0291111
260676_at	sugar transporter ERD6-like 4	AT1G19450	AT1G19450	WT-µg-LD	WT-1g-LD	3560.42	560.09	2.66832	0.0127871
251195_at	monothiol glutaredoxin-S6	AT3G62930	AT3G62930	WT-µg-LD	WT-1g-LD	102.927	16.2149	2.66624	0.035306
245505_at	monothiol glutaredoxin-S5	AT4G15690	AT4G15690	WT-µg-LD	WT-1g-LD	330.827	52.2987	2.66123	0.0368449
263264_at	HTA8 (HISTONE H2A 8); DNA binding	HTA8	AT2G38810	WT-µg-LD	WT-1g-LD	99.4903	15.758	2.65847	0.0361118
260560_at	chitinase family protein	AT2G43590	AT2G43590	WT-µg-LD	WT-1g-LD	633.725	100.404	2.65804	0.00143317
246948_at	CYP71B12; electron carrier/ heme binding / iron ion binding / monooxygenase/ oxygen binding	CYP71B12	AT5G25130	WT-µg-LD	WT-1g-LD	64.909	10.2866	2.65765	0.0430484
250133_at	ATF2; enzyme activator	TRXF2	AT5G16400	WT-µg-LD	WT-1g-LD	1023.4	162.351	2.65618	0.0379768
250529_at	DEAD-box ATP-dependent RNA helicase 26	AT5G08610	AT5G08610	WT-µg-LD	WT-1g-LD	530.2	84.1349	2.65576	0.0408892
251461_at	rhodanese/cell cycle control phosphatase superfamily protein	AT3G59780	AT3G59780	WT-µg-LD	WT-1g-LD	395.875	63.0181	2.65121	0.0086019
262566_at	ARF12 (AUXIN RESPONSE FACTOR 12); transcription factor	ARF12	AT1G34310	WT-µg-LD	WT-1g-LD	559.843	89.1282	2.65107	0.0267279
245876_at	chaperonin 60 subunit beta 4	AT1G26230	AT1G26230	WT-µg-LD	WT-1g-LD	260.138	41.4305	2.65051	0.0119069
263115_at	inhibition of secondary bud outgrowth protein D27-like protein	AT1G03055	AT1G03055	WT-µg-LD	WT-1g-LD	121.307	19.3528	2.64805	0.0111993
257699_at	PGK1 (PHOSPHOGLYCERATE KINASE 1); phosphoglycerate kinase	PGK1	AT3G12780	WT-µg-LD	WT-1g-LD	6268.08	1005.12	2.64066	0.0505304
262584_at	periodic tryptophan protein 2	PWP2	AT1G15440	WT-µg-LD	WT-1g-LD	589.499	94.9077	2.63489	0.00835024
246021_at	L-ascorbate oxidase	AT5G21100	AT5G21100	WT-µg-LD	WT-1g-LD	210.133	33.8701	2.63322	0.0221186
259082_at	pseudouridine synthase	AT3G04820	AT3G04820	WT-µg-LD	WT-1g-LD	196.772	31.8378	2.62771	0.025286
253397_at	proline-rich receptor-like protein kinase PERK14	AT4G32710	AT4G32710	WT-µg-LD	WT-1g-LD	63.6232	10.3038	2.62637	0.0472392
245364_at	hypothetical protein	AT4G15790	AT4G15790	WT-µg-LD	WT-1g-LD	134.748	21.8579	2.62404	0.0414802
261451_at	hypothetical protein	AT1G21060	AT1G21060	WT-µg-LD	WT-1g-LD	106.983	17.3755	2.62226	0.0142009
254669_at	DEG5 (DEGP PROTEASE 5); catalytic/ serine-type endopeptidase/ serine-type peptidase	DEG5	AT4G18370	WT-µg-LD	WT-1g-LD	537.342	87.3477	2.621	0.0325725
250563_at	hypothetical protein	AT5G08050	AT5G08050	WT-µg-LD	WT-1g-LD	1279.5	208.002	2.62091	0.00701256
245712_at	ATLDA (LIMIT DEXTRINASE); alpha-amylase/ limit dextrinase/ pullulanase	ATLDA	AT5G04360	WT-µg-LD	WT-1g-LD	394.4	64.1664	2.61977	0.0347388
256461_s_at	L-aspartase-like family protein /// L-aspartase-like family protein	AT1G36280 /// AT4G18440	AT1G36280 /// AT4G18440	WT-µg-LD	WT-1g-LD	118.36	19.261	2.61943	0.0380882
255809_at	cupin domain-containing protein	AT4G10300	AT4G10300	WT-µg-LD	WT-1g-LD	2864.37	467.793	2.61428	0.0159258
258449_s_at	PMH1 (PUTATIVE MITOCHONDRIAL RNA HELICASE 1); ATP-dependent helicase/ DNA binding / RNA binding	PMH1	AT3G22310 /// AT3G22330	WT-µg-LD	WT-1g-LD	1406.41	229.8	2.61356	0.00565683
248036_at	nucleolar protein, putative	OLI2	AT5G55920	WT-µg-LD	WT-1g-LD	859.311	140.408	2.61356	0.0160481
250257_at	pentatricopeptide repeat-containing protein	AT5G13770	AT5G13770	WT-µg-LD	WT-1g-LD	1766.87	289.268	2.61072	0.0339819
250146_at	PDF1B (PEPTIDE DEFORMYLASE 1B); iron ion binding / peptide deformylase	PDF1B	AT5G14660	WT-µg-LD	WT-1g-LD	439.274	71.9979	2.6091	0.0156131
254398_at	oxygen-evolving enhancer protein 3, chloroplast, putative (PSBQ1) (PSBQ)	PSBQA	AT4G21280	WT-µg-LD	WT-1g-LD	4421.72	725.619	2.60732	0.00270494
255046_at	ATPD (ATP SYNTHASE DELTA-SUBUNIT GENE); hydrogen ion transporting ATP synthase, rotational mechanism / proton-transporting ATPase, rotational mechanism	ATPD	AT4G09650	WT-µg-LD	WT-1g-LD	2892.35	476.461	2.60181	0.00804142
259237_at	2-Cys peroxiredoxin BAS1	AT3G11630	AT3G11630	WT-µg-LD	WT-1g-LD	4571.1	753.682	2.60051	0.0298804
245093_at	calcium-dependent lipid-binding domain-containing protein	AT2G40815	AT2G40815	WT-µg-LD	WT-1g-LD	83.8258	13.8305	2.59954	0.0310941
251740_at	ROC2 (ROTAMASE CYCLOPHILIN 2); cyclosporin A binding / peptidyl-prolyl cis-trans isomerase	ROC2	AT3G56070	WT-µg-LD	WT-1g-LD	982.108	162.302	2.5972	0.00966601
251670_at	peptide chain release factor 3	AT3G57190	AT3G57190	WT-µg-LD	WT-1g-LD	410.277	67.8357	2.59648	0.00904231
253251_at	ribosome-binding factor A	AT4G34730	AT4G34730	WT-µg-LD	WT-1g-LD	368.407	60.9683	2.59517	0.0145075
262954_at	rubredoxin-like protein	AT1G54500	AT1G54500	WT-µg-LD	WT-1g-LD	2728.04	451.589	2.59478	0.00712307
256810_at	hypothetical protein	AT3G21465	---	WT-µg-LD	WT-1g-LD	127.515	21.1124	2.59451	0.0390625
255501_at	U3 ribonucleoprotein family protein	AT4G02400	AT4G02400	WT-µg-LD	WT-1g-LD	353.354	58.6093	2.59191	0.00868413
250429_at	kinesin CDKA;1 associated 1	KAC1	AT5G10470	WT-µg-LD	WT-1g-LD	809.234	134.292	2.59119	0.0285545
262632_at	PSBP-1 (PHOTOSYSTEM II SUBUNIT P-1); poly(U) binding	PSBP-1	AT1G06680	WT-µg-LD	WT-1g-LD	10548.3	1752.65	2.5894	0.0145194
250265_at	hypothetical protein	AT5G12900	AT5G12900	WT-µg-LD	WT-1g-LD	68.2274	11.3472	2.58801	0.00580546
247376_at	NDPK2 (NUCLEOSIDE DIPHOSPHATE KINASE 2); ATP binding / nucleoside diphosphate kinase/ protein binding	NDPK2	AT5G63310	WT-µg-LD	WT-1g-LD	1568.9	261.004	2.58761	0.000669387
255793_at	hypothetical protein	AT2G33250	AT2G33250	WT-µg-LD	WT-1g-LD	666.315	110.888	2.5871	0.00527001
253777_at	WD repeat and SOF domain-containing protein 1	AT4G28450	AT4G28450	WT-µg-LD	WT-1g-LD	677.774	112.881	2.586	0.00653765
259347_at	H/ACA ribonucleoprotein complex, subunit Gar1/Naf1 protein	AT3G03920	AT3G03920	WT-µg-LD	WT-1g-LD	2548.84	424.733	2.58522	0.00382308
264529_at	CTP synthase-like protein	AT1G30820	AT1G30820	WT-µg-LD	WT-1g-LD	1037.64	172.934	2.58501	0.0224477
258630_at	CCHC-type zinc knuckle protein	AT3G02820	AT3G02820	WT-µg-LD	WT-1g-LD	76.4512	12.7723	2.58152	0.0239267
250255_at	SIG4 (SIGMA FACTOR 4); DNA binding / DNA-directed RNA polymerase/ sigma factor/ transcription factor	SIG4	AT5G13730	WT-µg-LD	WT-1g-LD	487.396	81.4771	2.58063	0.01937
257983_at	NAD(P)-binding Rossmann-fold superfamily protein	AT3G20790	AT3G20790	WT-µg-LD	WT-1g-LD	407.302	68.1066	2.58023	0.012768
251353_at	protein kinase superfamily protein	AT3G61080	AT3G61080	WT-µg-LD	WT-1g-LD	621.272	104.062	2.57778	0.0165767
250517_at	scpl35 (serine carboxypeptidase-like 35); serine-type carboxypeptidase	scpl35	AT5G08260	WT-µg-LD	WT-1g-LD	479.756	80.4896	2.57543	0.00451958
266587_at	SWIB/MDM2 domain-containing protein	AT2G14880	AT2G14880	WT-µg-LD	WT-1g-LD	951.2	160.033	2.57138	0.00638553
265147_at	DEAD-box ATP-dependent RNA helicase 34	AT1G51380	AT1G51380	WT-µg-LD	WT-1g-LD	86.5543	14.6233	2.56534	0.0497669
257271_at	bidirectional sugar transporter SWEET4	AT3G28007	AT3G28007	WT-µg-LD	WT-1g-LD	229.604	38.8519	2.56309	0.02163
262634_at	uncharacterized oxidoreductase	AT1G06690	AT1G06690	WT-µg-LD	WT-1g-LD	671.881	113.782	2.56193	0.0243129
262199_at	hypothetical protein	AT1G53800	AT1G53800	WT-µg-LD	WT-1g-LD	181.718	30.7755	2.56185	0.00524822
266119_at	LCR69 (LOW-MOLECULAR-WEIGHT CYSTEINE-RICH 69); peptidase inhibitor	LCR69	AT2G02100	WT-µg-LD	WT-1g-LD	3059.28	519.73	2.55736	0.0205364
258621_at	ZFN1 (ZINC FINGER PROTEIN 1); DNA binding / nuclease/ nucleic acid binding	ZFN1	AT3G02830	WT-µg-LD	WT-1g-LD	502.284	85.4155	2.55593	0.00802174
245437_at	DEAD-box ATP-dependent RNA helicase 28	AT4G16630	---	WT-µg-LD	WT-1g-LD	383.256	65.2032	2.55529	0.00611339
265326_at	nucleolar complex protein 2-like protein	AT2G18220	AT2G18220	WT-µg-LD	WT-1g-LD	231.341	39.3749	2.55468	0.0242152
261222_at	GDSL esterase/lipase	AT1G20120	AT1G20120	WT-µg-LD	WT-1g-LD	255.411	43.5085	2.55345	0.00319032
259860_at	probable receptor-like protein kinase	AT1G80640	AT1G80640	WT-µg-LD	WT-1g-LD	349.718	59.7052	2.55026	0.0127127
249109_at	ATAUX2-11 (AUXIN INDUCIBLE 2-11); DNA binding / transcription factor	ATAUX2-11	AT5G43700	WT-µg-LD	WT-1g-LD	366.159	62.5635	2.54908	0.0468342
251118_at	APG1 (ALBINO OR PALE GREEN MUTANT 1); 2-methyl-6-phytyl-1,4-benzoquinone methyltransferase/ S-adenosylmethionine-dependent methyltransferase/ methyltransferase	APG1	AT3G63410	WT-µg-LD	WT-1g-LD	3682.31	629.94	2.54732	0.00537999
261569_at	LHY (LATE ELONGATED HYPOCOTYL); DNA binding / transcription factor	LHY	AT1G01060	WT-µg-LD	WT-1g-LD	4542.71	780.191	2.54165	0.00944544
249134_at	hypothetical protein	AT5G43150	AT5G43150	WT-µg-LD	WT-1g-LD	1002.06	172.239	2.54049	0.0131026
266892_at	AtGLDP2 (Arabidopsis thaliana glycine decarboxylase P-protein 2); ATP binding / glycine dehydrogenase (decarboxylating)	AtGLDP2	AT2G26080	WT-µg-LD	WT-1g-LD	4528.15	779.644	2.53803	0.0170357
258701_at	DEAD-box ATP-dependent RNA helicase 57	AT3G09720	AT3G09720	WT-µg-LD	WT-1g-LD	189.09	32.5587	2.53796	0.0331518
251846_at	HTA11; DNA binding	HTA11	AT3G54560	WT-µg-LD	WT-1g-LD	169.066	29.1834	2.53437	0.0202564
247549_at	MYB28 (myb domain protein 28); DNA binding / transcription factor	MYB28	AT5G61420	WT-µg-LD	WT-1g-LD	323.936	55.9486	2.53354	0.00665255
265340_at	AAA-type ATPase-like protein	AT2G18330	AT2G18330	WT-µg-LD	WT-1g-LD	363.329	62.8374	2.53158	0.0152882
257766_at	IAA2 (INDOLE-3-ACETIC ACID INDUCIBLE 2); transcription factor	IAA2	AT3G23030	WT-µg-LD	WT-1g-LD	2036.78	352.787	2.52942	0.00640464
264204_at	SUC2 (SUCROSE-PROTON SYMPORTER 2); carbohydrate transmembrane transporter/ sucrose transmembrane transporter/ sucrose:hydrogen symporter/ sugar:hydrogen symporter	SUC2	AT1G22710	WT-µg-LD	WT-1g-LD	2971.7	516.859	2.52345	0.0388313
249091_at	ATCLH2; chlorophyllase	CLH2	AT5G43860	WT-µg-LD	WT-1g-LD	171.831	29.9625	2.51976	0.0152498
249816_at	CPSF100 (CLEAVAGE AND POLYADENYLATION SPECIFICITY FACTOR 100); DNA binding / protein binding	CPSF100	AT5G23880	WT-µg-LD	WT-1g-LD	283.303	49.5404	2.51567	0.0154408
267371_at	CDK inhibitor P21 binding protein	AT2G44510	AT2G44510	WT-µg-LD	WT-1g-LD	147.492	25.8097	2.51465	0.0180264
263474_at	hypothetical protein	AT2G31725	AT2G31725	WT-µg-LD	WT-1g-LD	81.1385	14.2088	2.5136	0.0202405
247575_at	GR-RBP3 (glycine-rich RNA-binding protein 3); ATP binding / RNA binding	GR-RBP3	AT5G61030	WT-µg-LD	WT-1g-LD	517.983	90.7885	2.51232	0.0289388
251760_at	mitochondrial glycoprotein family protein	AT3G55605	AT3G55605	WT-µg-LD	WT-1g-LD	394.588	69.2506	2.51045	0.0296061
265991_at	SCA3 (SCABRA 3); DNA binding / DNA-directed RNA polymerase	SCA3	AT2G24120	WT-µg-LD	WT-1g-LD	275.309	48.3798	2.50857	0.0502748
262977_at	dehydration-responsive element-binding protein 2D	AT1G75490	AT1G75490	WT-µg-LD	WT-1g-LD	185.794	32.6896	2.5068	0.0278225
248105_at	FTSZ1-1; protein binding / structural molecule	FTSZ1-1	AT5G55280	WT-µg-LD	WT-1g-LD	717.294	126.437	2.50414	0.0461654
261118_at	ATP-dependent protease La domain-containing protein	AT1G75460	AT1G75460	WT-µg-LD	WT-1g-LD	1461.99	257.784	2.5037	0.0432074
257206_at	legume lectin-like protein	AT3G16530	AT3G16530	WT-µg-LD	WT-1g-LD	11694.6	2062.86	2.50312	0.0133896
263739_at	B-box zinc finger family protein	AT2G21320	AT2G21320	WT-µg-LD	WT-1g-LD	981.133	173.571	2.49892	0.0024076
256855_at	30S ribosomal protein S20	AT3G15190	AT3G15190	WT-µg-LD	WT-1g-LD	3705.46	657.926	2.49366	0.0271499
264436_at	ERD9 (EARLY-RESPONSIVE TO DEHYDRATION 9); glutathione transferase	ERD9	AT1G10370	WT-µg-LD	WT-1g-LD	498.657	88.5488	2.4935	0.0211232
258592_at	pentatricopeptide repeat-containing protein	AT3G04130	AT3G04130	WT-µg-LD	WT-1g-LD	111.202	19.7714	2.4917	0.0423659
263597_at	hypothetical protein	AT2G01870	AT2G01870	WT-µg-LD	WT-1g-LD	286.464	50.937	2.49157	0.0192374
263210_at	basic helix-loop-helix domain-containing protein	AT1G10585	AT1G10585	WT-µg-LD	WT-1g-LD	232.029	41.3971	2.4867	0.0143395
255278_at	transducin/WD40 domain-containing protein	AT4G04940	AT4G04940	WT-µg-LD	WT-1g-LD	330.263	58.9426	2.48623	0.0325187
256542_at	PMI1 (PLASTID MOVEMENT IMPAIRED1)	PMI1	AT1G42550	WT-µg-LD	WT-1g-LD	2117.6	378.132	2.48547	0.0150761
244937_at	NADH dehydrogenase 49 kDa subunit	ndhH	ATCG01110	WT-µg-LD	WT-1g-LD	607.055	108.588	2.48296	0.00302328
267004_at	WDxR motif-containing protein	AT2G34260	AT2G34260	WT-µg-LD	WT-1g-LD	737.02	132.066	2.48044	0.0180107
266278_at	tropinone reductase-like protein	AT2G29300	AT2G29300	WT-µg-LD	WT-1g-LD	143.09	25.6471	2.48006	0.0403084
245952_at	hypothetical protein	AT5G28500	AT5G28500	WT-µg-LD	WT-1g-LD	1301.51	233.698	2.47747	0.0334419
250960_at	hypothetical protein	AT5G02940	AT5G02940	WT-µg-LD	WT-1g-LD	397.283	71.4562	2.47503	0.0356428
250668_at	proline-rich family protein	AT5G07020	AT5G07020	WT-µg-LD	WT-1g-LD	1182.26	212.798	2.47399	0.0502538
256396_at	hypothetical protein	AT3G06150	AT3G06150	WT-µg-LD	WT-1g-LD	417.091	75.2844	2.46994	0.0155334
246575_at	ribosome biogenesis co-factor	AT1G31660	AT1G31660	WT-µg-LD	WT-1g-LD	717.101	129.65	2.46756	0.0358211
260157_at	ribosomal RNA processing Brix domain protein	AT1G52930	AT1G52930	WT-µg-LD	WT-1g-LD	1465.8	265.279	2.4661	0.044643
246523_at	COL1 (constans-like 1); transcription factor/ zinc ion binding	COL1	AT5G15850	WT-µg-LD	WT-1g-LD	8292.37	1503.53	2.46343	0.0218528
253013_at	mtHsc70-1 (mitochondrial heat shock protein 70-1); ATP binding	mtHsc70-1	AT4G37910	WT-µg-LD	WT-1g-LD	2686.76	488.1	2.46062	0.0103946
262448_at	WD40 domain-containing protein	AT1G49450	AT1G49450	WT-µg-LD	WT-1g-LD	203.451	36.9823	2.45977	0.0166183
257966_at	hypothetical protein	AT3G19800	AT3G19800	WT-µg-LD	WT-1g-LD	1441.71	262.271	2.45865	0.0150934
255856_at	protein kinase-related protein	AT1G66940	AT1G66940	WT-µg-LD	WT-1g-LD	685.151	125.065	2.45374	0.0414676
248759_at	RING-H2 finger protein ATL79	AT5G47610	AT5G47610	WT-µg-LD	WT-1g-LD	804.71	147.016	2.45249	0.0511235
260155_at	peroxisomal membrane Mpv17/PMP22 family protein	AT1G52870	AT1G52870	WT-µg-LD	WT-1g-LD	6118.14	1117.81	2.45242	0.0253097
257642_at	BHLH32 (BASIC HELIX-LOOP-HELIX 32); DNA binding / transcription factor	BHLH32	AT3G25710	WT-µg-LD	WT-1g-LD	155.811	28.4704	2.45226	0.0285687
262164_at	transducin/WD40 repeat-like superfamily protein	AT1G78070	AT1G78070	WT-µg-LD	WT-1g-LD	3972.39	726.13	2.45171	0.0244221
259908_at	ATRPAC42; DNA binding / DNA-directed RNA polymerase/ protein dimerization	ATRPAC42	AT1G60850	WT-µg-LD	WT-1g-LD	322.49	58.9809	2.45094	0.0283152
267545_at	GRP23 (GLYCINE-RICH PROTEIN 23)	GRP23	AT2G32690	WT-µg-LD	WT-1g-LD	600.298	109.796	2.45085	0.00197731
245502_at	hypothetical protein	AT4G15640	AT4G15640	WT-µg-LD	WT-1g-LD	322.648	59.0567	2.44979	0.00251659
264284_at	Protein kinase family protein	AT1G61860	AT1G61860	WT-µg-LD	WT-1g-LD	72.9743	13.3579	2.4497	0.0348446
264037_at	cytosolic sulfotransferase 11	AT2G03750	AT2G03750	WT-µg-LD	WT-1g-LD	695.096	127.274	2.44928	0.0187434
262937_at	FTSH12 (FTSH PROTEASE 12); ATP-dependent peptidase/ ATPase/ metallopeptidase	FTSH12	AT1G79560	WT-µg-LD	WT-1g-LD	326.631	60.0327	2.44384	0.0138863
259759_at	tubulin-tyrosine ligase	AT1G77550	AT1G77550	WT-µg-LD	WT-1g-LD	235.518	43.3198	2.44274	0.0362276
246478_at	pentatricopeptide repeat-containing protein	AT5G15980	AT5G15980	WT-µg-LD	WT-1g-LD	218.291	40.2065	2.44075	0.0288595
262648_at	[fructose-bisphosphate aldolase]-lysine N-methyltransferase	AT1G14030	AT1G14030	WT-µg-LD	WT-1g-LD	237.787	43.8824	2.43796	0.0179334
248798_at	50S ribosomal protein L19-2	AT5G47190	AT5G47190	WT-µg-LD	WT-1g-LD	877.768	162.303	2.43515	0.0142221
262693_at	hypothetical protein	AT1G62780	AT1G62780	WT-µg-LD	WT-1g-LD	1045.84	193.41	2.43492	0.0263629
249510_at	rhomboid-related intramembrane serine protease-like protein	AT5G38510	AT5G38510	WT-µg-LD	WT-1g-LD	564.936	104.586	2.43339	0.010426
258250_at	FAD5 (FATTY ACID DESATURASE 5); 16:0 monogalactosyldiacylglycerol desaturase/ oxidoreductase	FAD5	AT3G15850	WT-µg-LD	WT-1g-LD	3638.65	673.738	2.43314	0.017046
248801_at	HAT2; DNA binding / transcription factor/ transcription repressor	HAT2	AT5G47370	WT-µg-LD	WT-1g-LD	1238.75	229.487	2.43241	0.0212225
260049_at	NRPA2; DNA binding / DNA-directed RNA polymerase/ ribonucleoside binding	NRPA2	AT1G29940	WT-µg-LD	WT-1g-LD	878.135	162.954	2.42998	0.0539954
247101_at	aldose 1-epimerase family protein	AT5G66530	AT5G66530	WT-µg-LD	WT-1g-LD	1516.14	281.457	2.42942	0.0344347
262397_at	cytochrome c biogenesis protein CCS1	AT1G49380	AT1G49380	WT-µg-LD	WT-1g-LD	372.173	69.3115	2.42481	0.009595
252972_at	SAUR-like auxin-responsive protein	AT4G38840	AT4G38840	WT-µg-LD	WT-1g-LD	1990.61	370.801	2.42449	0.0247652
247818_at	P-loop containing nucleoside triphosphate hydrolases superfamily protein	AT5G58370	AT5G58370	WT-µg-LD	WT-1g-LD	281.656	52.4799	2.4241	0.0328589
264270_at	BGLU5 (BETA GLUCOSIDASE 5)	BGLU5	AT1G60260	WT-µg-LD	WT-1g-LD	175.259	32.6788	2.42306	0.0270739
266284_at	APUM2 (Arabidopsis Pumilio 2); RNA binding / binding	APUM2	AT2G29190	WT-µg-LD	WT-1g-LD	247.743	46.2412	2.42159	0.0524743
260895_at	Alba DNA/RNA-binding protein	AT1G29250	AT1G29250	WT-µg-LD	WT-1g-LD	2212.45	413.466	2.4198	0.011165
247528_at	MIM (hypersensitive to MMS, irradiation and MMC); ATP binding	MIM	AT5G61460	WT-µg-LD	WT-1g-LD	127.137	23.8041	2.4171	0.0263381
261167_at	ATPDIL2-2 (PDI-LIKE 2-2); protein disulfide isomerase	ATPDIL2-2	AT1G04980	WT-µg-LD	WT-1g-LD	1801.31	337.29	2.41698	0.00995908
265420_s_at	BRX (BREVIS RADIX); identical protein binding / water channel	BRX	AT1G31880 /// AT2G21030	WT-µg-LD	WT-1g-LD	61.4506	11.5127	2.4162	0.0141539
258316_at	putative rRNA-processing protein EBP2-like protein	AT3G22660	AT3G22660	WT-µg-LD	WT-1g-LD	858.553	161.036	2.41452	0.00367007
267497_at	monothiol glutaredoxin-S9	AT2G30540	AT2G30540	WT-µg-LD	WT-1g-LD	178.203	33.4533	2.4133	0.0402638
254079_at	FtsJ-like methyltransferase family protein	AT4G25730	AT4G25730	WT-µg-LD	WT-1g-LD	603.012	113.353	2.41136	0.0285938
253566_at	DNA topoisomerase, type IA, core	AT4G31210	AT4G31210	WT-µg-LD	WT-1g-LD	495.497	93.3901	2.40754	0.0120618
245392_at	monothiol glutaredoxin-S4	AT4G15680	AT4G15680	WT-µg-LD	WT-1g-LD	263.448	49.6793	2.4068	0.0144266
251712_at	tRNA (guanine(37)-N1)-methyltransferase 1	AT3G56120	AT3G56120	WT-µg-LD	WT-1g-LD	262.051	49.4625	2.40544	0.0201995
265704_at	hypothetical protein	AT2G03420	AT2G03420	WT-µg-LD	WT-1g-LD	494.251	93.3857	2.40397	0.00214895
259475_at	hypothetical protein	AT1G19140	AT1G19140	WT-µg-LD	WT-1g-LD	686.487	129.894	2.4019	0.0237272
256409_at	E3 ubiquitin-protein ligase SINA-like 2	AT1G66620	AT1G66620	WT-µg-LD	WT-1g-LD	116.232	22.006	2.40103	0.0313687
250739_at	EGY2; metalloendopeptidase	EGY2	AT5G05740	WT-µg-LD	WT-1g-LD	476.75	90.3132	2.40022	0.0146111
259896_at	Rieske (2Fe-2S) domain-containing protein	AT1G71500	AT1G71500	WT-µg-LD	WT-1g-LD	3640.08	690.541	2.39817	0.00892448
255978_at	hypothetical protein	AT1G34010	AT1G34010	WT-µg-LD	WT-1g-LD	177.434	33.6901	2.39688	0.0219583
254137_at	thylakoid lumenal protein 17.9	AT4G24930	AT4G24930	WT-µg-LD	WT-1g-LD	921.629	175.049	2.39642	0.00675355
246295_at	CIP111 (CAM INTERACTING PROTEIN 111); ATPase/ calmodulin binding	CIP111	AT3G56690	WT-µg-LD	WT-1g-LD	172.293	32.7384	2.39581	0.00266516
259422_at	restriction endonuclease, type II-like superfamily protein	AT1G13810	AT1G13810	WT-µg-LD	WT-1g-LD	168.378	32.077	2.3921	0.0285119
264605_at	IAA12 (AUXIN-INDUCED PROTEIN 12); transcription factor/ transcription repressor	IAA12	AT1G04550	WT-µg-LD	WT-1g-LD	305.693	58.2952	2.39063	0.00765392
245933_at	VPS9B	VPS9B	AT5G09320	WT-µg-LD	WT-1g-LD	357.257	68.3364	2.38624	0.0226283
247651_at	HTA6; DNA binding	HTA6	AT5G59870	WT-µg-LD	WT-1g-LD	795.54	152.215	2.38583	0.0157471
263048_s_at	hypothetical protein /// hypothetical protein	AT2G05310 /// AT4G13500	AT2G05310 /// AT4G13500	WT-µg-LD	WT-1g-LD	1575.68	302.392	2.38149	0.0131225
267309_at	zinc ion binding protein	AT2G19385	AT2G19385	WT-µg-LD	WT-1g-LD	447.767	86.1749	2.37741	0.0493124
260343_at	fructokinase-like 2	FLN2	AT1G69200	WT-µg-LD	WT-1g-LD	247.555	47.6855	2.37612	0.0390672
263736_at	RNA recognition motif-containing protein	AT1G60000	AT1G60000	WT-µg-LD	WT-1g-LD	2363.36	455.303	2.37594	0.0182183
248201_at	PTAC15 (PLASTID TRANSCRIPTIONALLY ACTIVE15)	PTAC15	AT5G54180	WT-µg-LD	WT-1g-LD	196.151	37.7893	2.37591	0.0528904
261768_at	GA3OX1 (GIBBERELLIN 3-OXIDASE 1); gibberellin 3-beta-dioxygenase/ transcription factor binding	GA3OX1	AT1G15550	WT-µg-LD	WT-1g-LD	147.979	28.5174	2.37547	0.0248128
259275_at	hypothetical protein	AT3G01060	AT3G01060	WT-µg-LD	WT-1g-LD	2082.21	401.463	2.37478	0.0112616
250147_at	S-adenosyl-L-methionine-dependent methyltransferases superfamily protein	AT5G14600	AT5G14600	WT-µg-LD	WT-1g-LD	193.686	37.3448	2.37475	0.0244127
251701_at	Mog1/PsbP/DUF1795-like photosystem II reaction center PsbP family protein	AT3G56650	AT3G56650	WT-µg-LD	WT-1g-LD	617.901	119.268	2.37317	0.0486984
248380_at	PGM (PHOSPHOGLUCOMUTASE); phosphoglucomutase	PGM	AT5G51820	WT-µg-LD	WT-1g-LD	540.75	104.454	2.37209	0.00433738
245388_at	hypothetical protein	AT4G16410	AT4G16410	WT-µg-LD	WT-1g-LD	2664.61	514.864	2.37166	0.0425132
252661_at	hypothetical protein	AT3G44450	AT3G44450	WT-µg-LD	WT-1g-LD	336.358	64.9941	2.37162	0.00614936
265183_at	OB-fold nucleic acid binding domain-containing protein	AT1G23750	AT1G23750	WT-µg-LD	WT-1g-LD	112.82	21.8016	2.37151	0.0327374
266510_at	SWA1 (SLOW WALKER1); nucleotide binding	SWA1	AT2G47990	WT-µg-LD	WT-1g-LD	508.542	98.2905	2.37124	0.00454925
258747_at	hypothetical protein	AT3G05810	AT3G05810	WT-µg-LD	WT-1g-LD	376.136	72.7697	2.36985	0.0149213
253969_at	CSN6B	CSN6B	AT4G26430	WT-µg-LD	WT-1g-LD	229.792	44.4582	2.36981	0.0178374
246901_at	pentatricopeptide repeat-containing protein	AT5G25630	AT5G25630	WT-µg-LD	WT-1g-LD	1192.28	230.929	2.36821	0.0117862
253394_at	VTE1 (VITAMIN E DEFICIENT 1); tocopherol cyclase	VTE1	AT4G32770	WT-µg-LD	WT-1g-LD	317.361	61.5224	2.36694	0.0105511
266889_at	hypothetical protein	AT2G44640	AT2G44640	WT-µg-LD	WT-1g-LD	350.956	68.0364	2.36691	0.0140998
245518_at	ATRH1; ATP-dependent helicase/ DEAD/H-box RNA helicase binding	ATRH1	AT4G15850	WT-µg-LD	WT-1g-LD	144.569	28.0406	2.36617	0.0360314
259945_at	pentatricopeptide repeat-containing protein	AT1G71460	AT1G71460	WT-µg-LD	WT-1g-LD	101.657	19.741	2.36445	0.0385551
256144_at	RACK1B_AT (RECEPTOR FOR ACTIVATED C KINASE 1 B); nucleotide binding	RACK1B_AT	AT1G48630	WT-µg-LD	WT-1g-LD	2781.29	541.564	2.36055	0.00787796
263471_at	RAP	RAP	AT2G31890	WT-µg-LD	WT-1g-LD	285.403	55.5994	2.35986	0.00513829
264438_at	60S ribosomal protein L17-1	AT1G27400	AT1G27400	WT-µg-LD	WT-1g-LD	3797.15	739.942	2.35943	0.00270066
245326_at	hypothetical protein	AT4G14100	AT4G14100	WT-µg-LD	WT-1g-LD	375.231	73.2049	2.35777	0.00479057
255567_at	protein CURVATURE THYLAKOID 1A	AT4G01150	AT4G01150	WT-µg-LD	WT-1g-LD	8037.3	1568.76	2.35709	0.0199885
255694_at	UNE10 (unfertilized embryo sac 10); DNA binding / transcription factor	UNE10	AT4G00050	WT-µg-LD	WT-1g-LD	502.903	98.2109	2.35632	0.0241474
266551_at	hypothetical protein	AT2G35260	AT2G35260	WT-µg-LD	WT-1g-LD	1669.39	326.632	2.35359	0.0177564
259207_at	hypothetical protein	AT3G09050	AT3G09050	WT-µg-LD	WT-1g-LD	126.052	24.6766	2.3528	0.0286967
264958_at	hypothetical protein	AT1G76960	AT1G76960	WT-µg-LD	WT-1g-LD	1122.99	220.527	2.34831	0.0126391
259185_at	PPT2 (PHOSPHOENOLPYRUVATE (PEP)/PHOSPHATE TRANSLOCATOR 2); antiporter/ triose-phosphate transmembrane transporter	PPT2	AT3G01550	WT-µg-LD	WT-1g-LD	326.428	64.2915	2.34407	0.00356125
249464_at	EMB2745 (EMBRYO DEFECTIVE 2745)	EMB2745	AT5G39710	WT-µg-LD	WT-1g-LD	190.861	37.629	2.3426	0.0363349
262029_at	50S ribosomal protein L21	AT1G35680	AT1G35680	WT-µg-LD	WT-1g-LD	3366.1	664.365	2.34103	0.0225713
254333_at	SMO1-3 (STEROL 4-ALPHA METHYL OXIDASE 1-3); 4,4-dimethyl-9beta,19-cyclopropylsterol-4alpha-methyl oxidase/ catalytic	SMO1-3	AT4G22753	WT-µg-LD	WT-1g-LD	622.675	123.081	2.33887	0.0112137
261046_at	UDP-glycosyltransferase 72B2	AT1G01390	AT1G01390	WT-µg-LD	WT-1g-LD	251.021	49.7003	2.33648	0.0436704
246926_at	hypothetical protein	AT5G25240	AT5G25240	WT-µg-LD	WT-1g-LD	532.054	105.348	2.3364	0.0149807
247149_at	hydroxyproline-rich glycoprotein family protein	AT5G65660	AT5G65660	WT-µg-LD	WT-1g-LD	1346.47	266.786	2.33543	0.0431475
246339_at	RPL9 (RIBOSOMAL PROTEIN L9); structural constituent of ribosome	RPL9	AT3G44890	WT-µg-LD	WT-1g-LD	1336.01	264.864	2.33461	0.0368964
259892_at	GER1 (GERMIN-LIKE PROTEIN 1); oxalate oxidase	GER1	AT1G72610	WT-µg-LD	WT-1g-LD	9365.06	1859.72	2.3322	0.018382
265961_at	tetratricopeptide repeat domain-containing protein	AT2G37400	AT2G37400	WT-µg-LD	WT-1g-LD	452.26	89.9737	2.32958	0.00755702
246932_at	ethylene-responsive transcription factor ERF003	AT5G25190	AT5G25190	WT-µg-LD	WT-1g-LD	186.309	37.0872	2.32871	0.0149147
249899_at	putative 2-carboxy-D-arabinitol 1-phosphate phosphatase	AT5G22620	AT5G22620	WT-µg-LD	WT-1g-LD	500.474	99.7261	2.32725	0.00402783
253860_at	rhodanese-like domain-containing protein	AT4G27700	AT4G27700	WT-µg-LD	WT-1g-LD	1243.92	247.886	2.32715	0.00981047
254783_at	hydrolase, alpha/beta fold family protein	AT4G12830	AT4G12830	WT-µg-LD	WT-1g-LD	203.472	40.5611	2.32666	0.0469104
266293_at	tropinone reductase-like protein	AT2G29360	AT2G29360	WT-µg-LD	WT-1g-LD	412.787	82.2937	2.32654	0.000167382
256796_at	hypothetical protein	AT3G22210	AT3G22210	WT-µg-LD	WT-1g-LD	2229.72	444.703	2.32595	0.0180545
267471_at	FC2 (FERROCHELATASE 2); ferrochelatase	FC2	AT2G30390	WT-µg-LD	WT-1g-LD	905.764	181.026	2.32294	0.00214199
256873_at	CYP71B34; electron carrier/ heme binding / iron ion binding / monooxygenase/ oxygen binding	CYP71B34	AT3G26310	WT-µg-LD	WT-1g-LD	159.115	31.8589	2.3203	0.0304387
260968_at	Pentapeptide repeat-containing protein	AT1G12250	AT1G12250	WT-µg-LD	WT-1g-LD	1114.86	223.255	2.32009	0.0127454
250538_at	STRS2 (STRESS RESPONSE SUPPRESSOR 2); ATP-dependent helicase/ RNA binding	STRS2	AT5G08620	WT-µg-LD	WT-1g-LD	991.672	198.778	2.31871	0.00524432
263435_at	DEAD/DEAH box helicase-like protein	AT2G28600	AT2G28600	WT-µg-LD	WT-1g-LD	676.343	135.665	2.31771	0.00484737
263122_at	SPS1 (solanesyl diphosphate synthase 1); trans-octaprenyltranstransferase	SPS1	AT1G78510	WT-µg-LD	WT-1g-LD	1350.33	270.867	2.31766	0.0343439
260425_at	EDA25 (embryo sac development arrest 25)	EDA25	AT1G72440	WT-µg-LD	WT-1g-LD	859.131	172.455	2.31666	0.0179093
257483_at	ICK5; cyclin binding / cyclin-dependent protein kinase inhibitor	ICK5	AT1G49620	WT-µg-LD	WT-1g-LD	176.729	35.6629	2.30904	0.0125579
265203_at	Sulfite exporter TauE/SafE family protein	AT2G36630	AT2G36630	WT-µg-LD	WT-1g-LD	2242.9	452.728	2.30865	0.00679912
267162_s_at	phosphoribosylaminoimidazole carboxylase family protein / AIR carboxylase family protein /// putative phosphoribosylaminoimidazole carboxylase / AIR carboxylase	AT2G05140 /// AT2G37690	AT2G05140 /// AT2G37690	WT-µg-LD	WT-1g-LD	325.034	65.6317	2.30812	0.0268418
264948_at	putative DEAD-box ATP-dependent RNA helicase 29	AT1G77030	AT1G77030	WT-µg-LD	WT-1g-LD	108.582	21.928	2.30794	0.0358661
256962_at	glucan endo-1,3-beta-glucosidase 4	AT3G13560	AT3G13560	WT-µg-LD	WT-1g-LD	646.415	130.926	2.3037	0.0208582
256676_at	SEX4 (STARCH-EXCESS 4); polysaccharide binding / protein tyrosine/serine/threonine phosphatase	SEX4	AT3G52180	WT-µg-LD	WT-1g-LD	662.272	134.144	2.30364	0.0111985
255886_at	DRT112; copper ion binding / electron carrier	DRT112	AT1G20340	WT-µg-LD	WT-1g-LD	14811.6	3002.2	2.30264	0.014046
266142_at	L-ornithine N5-acetyltransferase NATA1	AT2G39030	AT2G39030	WT-µg-LD	WT-1g-LD	672.768	136.537	2.30081	0.0229485
253558_at	SKB1 (SHK1 BINDING PROTEIN 1); protein methyltransferase	SKB1	AT4G31120	WT-µg-LD	WT-1g-LD	618.184	125.46	2.3008	0.0315389
249247_at	pentatricopeptide repeat-containing protein	AT5G42310	AT5G42310	WT-µg-LD	WT-1g-LD	742.863	150.764	2.3008	0.016017
258598_at	no apical meristem-domain containing transcriptional regulator	AT3G04410	AT3G04410	WT-µg-LD	WT-1g-LD	51.7084	10.4955	2.30063	0.0520997
265715_s_at	QUASIMODO2 LIKE 1 /// QUASIMODO2 like 2	QUL1 /// QUL2	AT1G13860 /// AT2G03480	WT-µg-LD	WT-1g-LD	212.506	43.1678	2.29948	0.0138936
264916_at	ACLA-2; ATP citrate synthase	ACLA-2	AT1G60810	WT-µg-LD	WT-1g-LD	403.19	81.9048	2.29944	0.0409558
263951_at	NHL12	NHL12	AT2G35960	WT-µg-LD	WT-1g-LD	510.014	103.637	2.299	0.00706206
249694_at	G6PD1 (GLUCOSE-6-PHOSPHATE DEHYDROGENASE 1); glucose-6-phosphate dehydrogenase	G6PD1	AT5G35790	WT-µg-LD	WT-1g-LD	962.007	196.015	2.29508	0.01615
251196_at	glutaredoxin-C11	AT3G62950	AT3G62950	WT-µg-LD	WT-1g-LD	387.416	78.9527	2.29482	0.0320002
257954_at	UDP-glycosyltransferase HYR1	HYR1	AT3G21760	WT-µg-LD	WT-1g-LD	424.754	86.6633	2.29314	0.0202536
262727_at	pathogenesis-related thaumatin-like protein	AT1G75800	AT1G75800	WT-µg-LD	WT-1g-LD	1650.07	336.707	2.29296	0.00742224
245524_at	bidirectional sugar transporter SWEET17	AT4G15920	AT4G15920	WT-µg-LD	WT-1g-LD	322.461	65.8448	2.29198	0.0166907
249977_at	EMB3007 (embryo defective 3007); ATP binding / protein binding	EMB3007	AT5G18820	WT-µg-LD	WT-1g-LD	66.3285	13.5589	2.29039	0.0484693
248295_at	ribosomal protein L9/RNase H1	AT5G53070	AT5G53070	WT-µg-LD	WT-1g-LD	332.504	68.0211	2.28932	0.0337089
261196_at	SCRM2 (SCREAM 2); DNA binding / transcription factor	SCRM2	AT1G12860	WT-µg-LD	WT-1g-LD	159.768	32.7606	2.28594	0.0219401
263906_at	FTSZ2-1; protein binding / structural molecule	FTSZ2-1	AT2G36250	WT-µg-LD	WT-1g-LD	700.5	143.645	2.28588	0.0154783
254716_at	UNE15 (unfertilized embryo sac 15)	UNE15	AT4G13560	WT-µg-LD	WT-1g-LD	217.671	44.7022	2.28373	0.01365
265274_at	zinc finger CCCH domain-containing protein 24	AT2G28450	AT2G28450	WT-µg-LD	WT-1g-LD	399.528	82.1026	2.2828	0.00851234
253592_at	transducin/WD40 domain-containing protein	AT4G30840	AT4G30840	WT-µg-LD	WT-1g-LD	313.551	64.4744	2.2819	0.0153407
252132_at	esterase/lipase/thioesterase family protein	AT3G50790	AT3G50790	WT-µg-LD	WT-1g-LD	565.607	116.311	2.28182	0.016276
266311_at	bifunctional inhibitor/lipid-transfer protein/seed storage 2S albumin superfamily protein	AT2G27130	AT2G27130	WT-µg-LD	WT-1g-LD	158.632	32.6381	2.28105	0.0151752
253028_at	pde191 (pigment defective 191)	pde191	AT4G38160	WT-µg-LD	WT-1g-LD	637.788	131.456	2.2785	0.0175446
245797_at	hypothetical protein	AT1G45230	AT1G45230	WT-µg-LD	WT-1g-LD	848.872	175.171	2.27679	0.0117758
247098_at	GTP-binding protein Era-like protein	AT5G66470	AT5G66470	WT-µg-LD	WT-1g-LD	405.901	83.9042	2.27431	0.00735787
263796_at	AFR (ATTENUATED FAR-RED RESPONSE)	AFR	AT2G24540	WT-µg-LD	WT-1g-LD	407.453	84.2296	2.27424	0.00846591
259681_at	NIA1 (NITRATE REDUCTASE 1); nitrate reductase	NIA1	AT1G77760	WT-µg-LD	WT-1g-LD	2407.96	497.941	2.27377	0.0251016
245357_at	50S ribosomal protein L19-1	AT4G17560	AT4G17560	WT-µg-LD	WT-1g-LD	780.489	161.399	2.27375	0.0384244
256309_at	PSAK (photosystem I subunit K)	PSAK	AT1G30380	WT-µg-LD	WT-1g-LD	13101.2	2710.54	2.27305	0.0146007
245061_at	RCA (RUBISCO ACTIVASE); ADP binding / ATP binding / enzyme regulator/ ribulose-1,5-bisphosphate carboxylase/oxygenase activator	RCA	AT2G39730	WT-µg-LD	WT-1g-LD	25903.2	5376.52	2.26838	0.000461285
248191_at	calcium-binding endonuclease/exonuclease/phosphatase family protein	AT5G54130	AT5G54130	WT-µg-LD	WT-1g-LD	1421.49	295.303	2.26713	0.0193128
252363_at	GDSL esterase/lipase	AT3G48460	AT3G48460	WT-µg-LD	WT-1g-LD	186.726	38.837	2.26542	0.0145724
255691_at	ANTR2; inorganic phosphate transmembrane transporter/ organic anion transmembrane transporter	ANTR2	AT4G00370	WT-µg-LD	WT-1g-LD	1029.62	214.163	2.26533	0.00199106
259227_at	3'-5'-exoribonuclease family protein	AT3G07750	AT3G07750	WT-µg-LD	WT-1g-LD	301.471	62.7151	2.26514	0.0149147
262483_at	FUG1 (fu-gaeri1); translation initiation factor	FUG1	AT1G17220	WT-µg-LD	WT-1g-LD	3029.77	630.806	2.26394	0.0113958
245347_at	ferredoxin C1	AT4G14890	AT4G14890	WT-µg-LD	WT-1g-LD	2127.33	443.537	2.26192	0.0230234
263882_at	RNR1 (RIBONUCLEOTIDE REDUCTASE 1); ATP binding / protein binding / ribonucleoside-diphosphate reductase	RNR1	AT2G21790	WT-µg-LD	WT-1g-LD	357.374	74.579	2.26059	0.0271944
260075_at	MATE efflux family protein	AT1G73700	AT1G73700	WT-µg-LD	WT-1g-LD	60.343	12.5959	2.26023	0.00261448
251864_at	PMR6 (powdery mildew resistant 6); lyase/ pectate lyase	PMR6	AT3G54920	WT-µg-LD	WT-1g-LD	335.166	69.984	2.25978	0.0173227
259637_at	ATPDIL1-5 (PDI-LIKE 1-5); protein disulfide isomerase	ATPDIL1-5	AT1G52260	WT-µg-LD	WT-1g-LD	142.902	29.933	2.25522	0.0329614
262086_at	putative GTP-binding protein	AT1G56050	AT1G56050	WT-µg-LD	WT-1g-LD	315.789	66.3144	2.25157	0.011253
265726_at	inositol polyphosphate 5'-phosphatase	CVL1	AT2G32010	WT-µg-LD	WT-1g-LD	110.549	23.2214	2.25115	0.0326807
263706_s_at	isopropylmalate dehydrogenase 1 /// 3-isopropylmalate dehydrogenase 1	IMD1 /// IMD3	AT1G31180 /// AT5G14200	WT-µg-LD	WT-1g-LD	671.821	141.182	2.25052	0.024593
262577_at	tetratricopeptide repeat-containing protein	AT1G15290	AT1G15290	WT-µg-LD	WT-1g-LD	741.4	156.088	2.2479	0.0112633
257608_at	HSP60-3A (HEAT SHOCK PROTEIN 60-3A); ATP binding / protein binding	HSP60-3A	AT3G13860	WT-µg-LD	WT-1g-LD	813.87	171.618	2.2456	0.0164344
246461_at	AAA-type ATPase family protein	AT5G16930	AT5G16930	WT-µg-LD	WT-1g-LD	146.673	30.9436	2.24489	0.0141125
251593_at	NRPA1; DNA binding / DNA-directed RNA polymerase/ zinc ion binding	NRPA1	AT3G57660	WT-µg-LD	WT-1g-LD	344.637	72.7456	2.24415	0.0016687
266256_at	60S acidic ribosomal protein P2-2	AT2G27710	AT2G27710	WT-µg-LD	WT-1g-LD	5985.33	1263.73	2.24374	0.00842071
251953_at	CPuORF51 (Conserved peptide upstream open reading frame 51)	CPuORF51	AT3G53668 /// AT3G53670	WT-µg-LD	WT-1g-LD	314.496	66.61	2.23923	0.00407266
265722_at	LHCB4.3 (light harvesting complex PSII); chlorophyll binding	LHCB4.3	AT2G40100	WT-µg-LD	WT-1g-LD	1054.39	223.328	2.23918	0.0273557
258546_at	emb1974 (embryo defective 1974)	emb1974	AT3G07060	WT-µg-LD	WT-1g-LD	147.958	31.3559	2.23838	0.0369227
251476_at	hypothetical protein	AT3G59670	AT3G59670	WT-µg-LD	WT-1g-LD	332.128	70.3934	2.23823	0.0135262
248336_at	hypothetical protein	AT5G52420	AT5G52420	WT-µg-LD	WT-1g-LD	1378.8	292.246	2.23816	0.0306612
266608_at	shikimate kinase like 2	SKL2	AT2G35500	WT-µg-LD	WT-1g-LD	225.899	48.0157	2.2341	0.0149942
260745_at	ATGSTU20 (GLUTATHIONE S-TRANSFERASE TAU 20); glutathione transferase	ATGSTU20	AT1G78370	WT-µg-LD	WT-1g-LD	448.798	95.4338	2.23349	0.029019
264920_at	ECHID (ENOYL-COA HYDRATASE/ISOMERASE D); catalytic/ naphthoate synthase	ECHID	AT1G60550	WT-µg-LD	WT-1g-LD	796.733	169.448	2.23325	0.0385683
267005_at	NAD(P)-binding Rossmann-fold-containing protein	AT2G34460	AT2G34460	WT-µg-LD	WT-1g-LD	1206.09	257.092	2.22998	0.00600765
259116_at	putative peptide/nitrate transporter	AT3G01350	AT3G01350	WT-µg-LD	WT-1g-LD	256.087	54.6115	2.22936	0.00916467
261319_at	SPA4 (SPA1-RELATED 4); protein binding / signal transducer	SPA4	AT1G53090	WT-µg-LD	WT-1g-LD	965.534	206.092	2.22804	0.00976922
258161_at	protein DEFECTIVE ACCUMULATION OF CYTOCHROME B6/F COMPLEX	AT3G17930	AT3G17930	WT-µg-LD	WT-1g-LD	2577.2	550.252	2.22764	0.046111
263766_at	RNA recognition motif-containing protein	AT2G21440	AT2G21440	WT-µg-LD	WT-1g-LD	375.212	80.1164	2.22754	0.0431988
259193_at	CYP38 (cyclophilin 38); peptidyl-prolyl cis-trans isomerase	CYP38	AT3G01480	WT-µg-LD	WT-1g-LD	2040.13	435.833	2.22681	0.0119315
259955_s_at	BZR1 (BRASSINAZOLE-RESISTANT 1); DNA binding / transcription regulator/ transcription repressor	BZR1	AT1G19350 /// AT1G75080	WT-µg-LD	WT-1g-LD	2182.16	467.098	2.22396	0.00282854
251678_at	EDA7 (embryo sac development arrest 7)	EDA7	AT3G56990	WT-µg-LD	WT-1g-LD	187.927	40.23	2.22383	0.0275863
249929_at	hypothetical protein	AT5G22340	AT5G22340	WT-µg-LD	WT-1g-LD	464.726	99.5193	2.22333	0.0259247
259295_at	pentatricopeptide repeat-containing protein	AT3G05340	AT3G05340	WT-µg-LD	WT-1g-LD	540.243	115.883	2.22093	0.00217668
253042_at	acetamidase/formamidase family protein	AT4G37550	AT4G37550	WT-µg-LD	WT-1g-LD	1263.73	271.241	2.22004	0.0318069
245109_at	DNAJ heat shock N-terminal domain-containing protein	AT2G41520	AT2G41520	WT-µg-LD	WT-1g-LD	84.7245	18.1863	2.21993	0.0220282
262668_at	LDL1 (LSD1-LIKE1); amine oxidase/ electron carrier/ oxidoreductase	LDL1	AT1G62830	WT-µg-LD	WT-1g-LD	188.852	40.6926	2.21442	0.00773749
254260_at	TIR-NBS class of disease resistance protein	AT4G23440	AT4G23440	WT-µg-LD	WT-1g-LD	94.9706	20.4864	2.21281	0.0193664
267019_at	transmembrane amino acid transporter	AT2G39130	AT2G39130	WT-µg-LD	WT-1g-LD	292.13	63.023	2.21266	0.00754243
247980_at	GNC (GATA, nitrate-inducible, carbon metabolism-involved); transcription factor	GNC	AT5G56860	WT-µg-LD	WT-1g-LD	367.909	79.5731	2.209	0.00957065
261790_at	hypothetical protein	AT1G16000	AT1G16000	WT-µg-LD	WT-1g-LD	504.518	109.287	2.20678	0.0379879
261972_at	copper ion binding / methyltransferase	AT1G64600	AT1G64600	WT-µg-LD	WT-1g-LD	160.075	34.7361	2.20424	0.0207621
261784_at	hypothetical protein	AT1G08220	AT1G08220	WT-µg-LD	WT-1g-LD	213.173	46.3637	2.20095	0.0380562
257658_at	RNA-binding KH domain-containing protein	AT3G13230	AT3G13230	WT-µg-LD	WT-1g-LD	1443.11	314.357	2.1987	0.00561829
266300_at	PIN4 (PIN-FORMED 4); auxin:hydrogen symporter/ transporter	PIN4	AT2G01420	WT-µg-LD	WT-1g-LD	1220.35	265.958	2.19802	0.0547557
263873_at	violaxanthin de-epoxidase-related protein	AT2G21860	AT2G21860	WT-µg-LD	WT-1g-LD	889.609	194.016	2.197	0.0281329
251958_at	tetratricopeptide repeat domain-containing protein	AT3G53560	AT3G53560	WT-µg-LD	WT-1g-LD	590.868	129.037	2.19505	0.0289126
263104_at	nucleoporin, Nup133/Nup155-like protein	AT2G05120	AT2G05120	WT-µg-LD	WT-1g-LD	112.956	24.6932	2.19357	0.0262349
246280_at	hypothetical protein	AT4G36660	AT4G36660	WT-µg-LD	WT-1g-LD	286.087	62.5651	2.19302	0.0248579
247347_at	SHA1 (shoot apical meristem arrest 1); protein binding / zinc ion binding	SHA1	AT5G63780	WT-µg-LD	WT-1g-LD	977.927	213.883	2.19291	0.018036
265210_at	RPL24A (ribosomal protein L24); structural constituent of ribosome	RPL24A	AT2G36620	WT-µg-LD	WT-1g-LD	5144.84	1127.42	2.1901	0.00932199
262283_at	30S ribosomal protein 3-1	AT1G68590	AT1G68590	WT-µg-LD	WT-1g-LD	2602.66	571.321	2.18762	0.0078413
266903_at	MEE21 (maternal effect embryo arrest 21)	MEE21	AT2G34570	WT-µg-LD	WT-1g-LD	308.808	67.82	2.18693	0.014206
261861_at	Saccharopine dehydrogenase	AT1G50450	AT1G50450	WT-µg-LD	WT-1g-LD	687.873	151.168	2.18599	0.0054382
254638_at	Rho termination factor	AT4G18740	AT4G18740	WT-µg-LD	WT-1g-LD	457.389	100.638	2.18424	0.0232222
267237_s_at	dihydrodipicolinate reductase 1 /// dihydrodipicolinate reductase 2	AT2G44040 /// AT3G59890	AT2G44040 /// AT3G59890	WT-µg-LD	WT-1g-LD	206.129	45.4306	2.18181	0.0269142
245397_at	IAA1 (INDOLE-3-ACETIC ACID INDUCIBLE); protein binding / transcription factor	IAA1	AT4G14560	WT-µg-LD	WT-1g-LD	256.963	56.6898	2.1804	0.0504668
251211_s_at	pentatricopeptide repeat-containing protein /// pentatricopeptide repeat-containing protein /// pentatricopeptide repeat-containing protein	AT3G62470 /// AT3G62540 /// AT5G14820	AT3G62470 /// AT3G62540 /// AT5G14820	WT-µg-LD	WT-1g-LD	179.412	39.5861	2.18021	0.0265189
245897_at	KUP7; potassium ion transmembrane transporter	KUP7	AT5G09400	WT-µg-LD	WT-1g-LD	146.158	32.2543	2.17997	0.0294643
252199_at	HXXXD-type acyl-transferase-like protein	AT3G50270	AT3G50270	WT-µg-LD	WT-1g-LD	615.956	135.935	2.17991	0.0123987
263864_at	CPZ; 3'-tRNA processing endoribonuclease	CPZ	AT2G04530	WT-µg-LD	WT-1g-LD	365.889	80.8274	2.17849	0.00409322
245201_at	CSK (CHLOROPLAST SENSOR KINASE); ATP binding / kinase	CSK	AT1G67840	WT-µg-LD	WT-1g-LD	708.808	156.604	2.17828	0.0496602
261315_at	ERF8; DNA binding / transcription factor/ transcription repressor	ERF8	AT1G53170	WT-µg-LD	WT-1g-LD	3564.66	789.262	2.17519	0.0254491
267430_at	EDA3 (embryo sac development arrest 3); heat shock protein binding / unfolded protein binding	EDA3	AT2G34860	WT-µg-LD	WT-1g-LD	3081.65	682.625	2.17454	0.00579699
262806_at	pyrophosphate--fructose 6-phosphate 1-phosphotransferase subunit alpha 1	AT1G20950	AT1G20950	WT-µg-LD	WT-1g-LD	796.321	176.409	2.17443	0.0151436
248940_at	replication protein RPA70C	RPA70C	AT5G45400	WT-µg-LD	WT-1g-LD	82.737	18.3381	2.17369	0.0292353
257272_at	WAT1-related protein	AT3G28130	AT3G28130	WT-µg-LD	WT-1g-LD	98.7342	21.8893	2.17332	0.0141571
262784_at	SEX1 (STARCH EXCESS 1); alpha-glucan, water dikinase	SEX1	AT1G10760	WT-µg-LD	WT-1g-LD	1709.22	379.253	2.17211	0.00636092
257260_at	phototropic-responsive NPH3 family protein	AT3G22104	AT3G22104	WT-µg-LD	WT-1g-LD	289.652	64.3272	2.17082	0.0122689
246481_s_at	KIN1	KIN1	AT5G15960 /// AT5G15970	WT-µg-LD	WT-1g-LD	14025.7	3116.26	2.17019	0.0211359
259707_at	TAPX (THYLAKOIDAL ASCORBATE PEROXIDASE); L-ascorbate peroxidase	TAPX	AT1G77490	WT-µg-LD	WT-1g-LD	704.978	156.815	2.16852	0.0132515
250679_at	HR demethylase-like protein	AT5G06550	AT5G06550	WT-µg-LD	WT-1g-LD	268.734	59.7781	2.16849	0.0229769
246525_at	CO (CONSTANS); transcription factor/ transcription regulator/ zinc ion binding	CO	AT5G15840	WT-µg-LD	WT-1g-LD	89.8079	19.9788	2.16837	0.045217
258495_at	nucleotide/sugar transporter family protein	AT3G02690	AT3G02690	WT-µg-LD	WT-1g-LD	910.149	202.518	2.16805	0.0252917
264260_at	calreticulin 1b	CRT1b	AT1G09210	WT-µg-LD	WT-1g-LD	8086.99	1799.84	2.16774	0.0191786
264613_at	LIP2 (LIPOYLTRANSFERASE 2); lipoyltransferase	LIP2	AT1G04640	WT-µg-LD	WT-1g-LD	679.734	151.873	2.16211	0.0458477
267553_s_at	PTAC18 (PLASTID TRANSCRIPTIONALLY ACTIVE 18)	PTAC18	AT2G32180 /// AT2G32650	WT-µg-LD	WT-1g-LD	941.428	210.809	2.15892	0.00107566
260235_at	NRP1 (NAP1-RELATED PROTEIN 1); DNA binding / chromatin binding / histone binding	NRP1	AT1G74560	WT-µg-LD	WT-1g-LD	1333.5	298.674	2.15858	0.0117608
246110_at	SOUL heme-binding protein	AT5G20140	AT5G20140	WT-µg-LD	WT-1g-LD	329.741	74.0176	2.15539	0.0424614
266489_at	NPSN11 (NOVEL PLANT SNARE 11); SNAP receptor/ protein transporter	NPSN11	AT2G35190	WT-µg-LD	WT-1g-LD	104.881	23.6289	2.15013	0.0143351
247241_at	hypothetical protein	AT5G64680	AT5G64680	WT-µg-LD	WT-1g-LD	666.071	150.178	2.14901	0.0261493
265938_at	N-MYC downregulated-like 3 protein	NDL3	AT2G19620	WT-µg-LD	WT-1g-LD	399.719	90.1315	2.14888	0.0108629
255449_at	pentatricopeptide repeat-containing protein	AT4G02820	AT4G02820	WT-µg-LD	WT-1g-LD	107.349	24.2169	2.14822	0.00293256
256343_at	Methylthiotransferase	AT1G72090	AT1G72090	WT-µg-LD	WT-1g-LD	570.61	128.916	2.14607	0.0375438
254963_at	MTSSB (mitochondrially targeted single-stranded DNA binding protein); single-stranded DNA binding	MTSSB	AT4G11060	WT-µg-LD	WT-1g-LD	249.358	56.3443	2.14588	0.00735362
245015_at	RuBisCO large subunit	rbcL	ATCG00490	WT-µg-LD	WT-1g-LD	5538.12	1253.95	2.14292	0.0298832
255455_at	putative elongation factor Tu	AT4G02930	AT4G02930	WT-µg-LD	WT-1g-LD	1361.5	308.408	2.14228	0.00982461
262281_at	putative nitrite transporter	AT1G68570	AT1G68570	WT-µg-LD	WT-1g-LD	1422.99	322.59	2.14115	0.0133094
265128_at	RING/U-box superfamily protein	AT1G30860	AT1G30860	WT-µg-LD	WT-1g-LD	261.909	59.4379	2.13961	0.026213
262544_at	hypothetical protein	AT1G15420	AT1G15420	WT-µg-LD	WT-1g-LD	744.789	169.113	2.13885	0.0315107
259138_s_at	DNA gyrase subunit B /// DNA gyrase subunit B	GYRB1 /// GYRB2	AT3G10270 /// AT5G04130	WT-µg-LD	WT-1g-LD	299.701	68.1094	2.1376	0.0149762
248418_at	CPSF160; nucleic acid binding	CPSF160	AT5G51660	WT-µg-LD	WT-1g-LD	205.658	46.7497	2.13722	0.0216272
247584_at	60S ribosomal protein L12-3	AT5G60670	AT5G60670	WT-µg-LD	WT-1g-LD	3024.95	687.632	2.1372	0.00340105
249866_at	MAM1 (METHYLTHIOALKYLMALATE SYNTHASE 1); 2-isopropylmalate synthase/ methylthioalkylmalate synthase	MAM1	AT5G23010	WT-µg-LD	WT-1g-LD	2030.78	461.639	2.1372	0.0276567
266264_at	hypothetical protein	AT2G27775	AT2G27775	WT-µg-LD	WT-1g-LD	319.697	72.7505	2.13567	0.0304319
256480_at	SAR1 (suppressor of auxin resistance1)	SAR1	AT1G33410	WT-µg-LD	WT-1g-LD	418.157	95.2054	2.13493	0.0391107
266716_at	PSI-P (PHOTOSYSTEM I P SUBUNIT); DNA binding	PSI-P	AT2G46820	WT-µg-LD	WT-1g-LD	6340.36	1444.27	2.13422	0.0283962
257000_at	hypothetical protein	AT3G14120	AT3G14120	WT-µg-LD	WT-1g-LD	352.314	80.3887	2.1318	0.0197239
247450_at	plant invertase/pectin methylesterase inhibitor superfamily protein	AT5G62350	AT5G62350	WT-µg-LD	WT-1g-LD	2572.97	587.343	2.13116	0.00850987
261667_at	alpha/beta-Hydrolases superfamily protein	AT1G18460	AT1G18460	WT-µg-LD	WT-1g-LD	1385.88	316.854	2.12891	0.0426933
263133_at	SOUL/heme-binding protein-like protein	AT1G78450	AT1G78450	WT-µg-LD	WT-1g-LD	158.472	36.2363	2.12872	0.0360898
250667_at	40S ribosomal protein S4-2	AT5G07090	AT5G07090	WT-µg-LD	WT-1g-LD	2469.56	565.19	2.12745	0.00664682
247908_at	GS1; catalytic/ hydrolase	GS1	AT5G57440	WT-µg-LD	WT-1g-LD	227.232	52.0085	2.12735	0.00437838
257193_at	pentatricopeptide repeat-containing protein	AT3G13160	AT3G13160	WT-µg-LD	WT-1g-LD	235.211	53.8998	2.12561	0.038042
245355_at	60S ribosomal protein L15-2	AT4G17390	AT4G17390	WT-µg-LD	WT-1g-LD	6015.96	1384.28	2.11966	0.00363688
256377_at	E3 ubiquitin-protein ligase SINA-like 4	AT1G66650	AT1G66650	WT-µg-LD	WT-1g-LD	109.612	25.2367	2.11881	0.00481415
255016_at	ATSPS4F; sucrose-phosphate synthase/ transferase, transferring glycosyl groups	ATSPS4F	AT4G10120	WT-µg-LD	WT-1g-LD	1928.26	444.005	2.11865	0.00583668
259179_at	S-adenosylmethionine-dependent methyltransferase domain-containing protein	AT3G01660	AT3G01660	WT-µg-LD	WT-1g-LD	544.979	125.693	2.1163	0.0436552
249193_at	ARC6 (ACCUMULATION AND REPLICATION OF CHLOROPLASTS 6); protein binding	ARC6	AT5G42480	WT-µg-LD	WT-1g-LD	382.059	88.1972	2.11499	0.00577071
260316_at	hypothetical protein	AT1G63810	AT1G63810	WT-µg-LD	WT-1g-LD	386.264	89.2396	2.11383	0.00653404
258125_s_at	cyclopropane-fatty-acyl-phospholipid synthase /// Cyclopropane-fatty-acyl-phospholipid synthase	AT3G23510 /// AT3G23530	AT3G23510 /// AT3G23530	WT-µg-LD	WT-1g-LD	165.255	38.2262	2.11206	0.0165168
256383_at	glycine-rich protein	AT1G66820	AT1G66820	WT-µg-LD	WT-1g-LD	906.216	209.641	2.11193	0.0431524
259367_at	hypothetical protein	AT1G69070	AT1G69070	WT-µg-LD	WT-1g-LD	276.811	64.0868	2.1108	0.0251285
261782_at	high mobility group B protein 9	AT1G76110	AT1G76110	WT-µg-LD	WT-1g-LD	310.812	72.0086	2.1098	0.0285394
253343_at	metallo-beta-lactamase family protein	AT4G33540	AT4G33540	WT-µg-LD	WT-1g-LD	3877.08	898.603	2.10922	0.0114523
261461_at	putative protein kinase	AT1G07860	AT1G07860 /// AT1G07870	WT-µg-LD	WT-1g-LD	124.685	28.9305	2.10762	0.0144844
259925_at	PR5 (PATHOGENESIS-RELATED GENE 5)	PR5	AT1G75040	WT-µg-LD	WT-1g-LD	15045.1	3494.18	2.10627	0.0193764
254133_at	protein kinase family protein	AT4G24810	AT4G24810	WT-µg-LD	WT-1g-LD	208.215	48.361	2.10616	0.00380703
262168_at	hypothetical protein	AT1G74730	AT1G74730	WT-µg-LD	WT-1g-LD	2651.14	616.678	2.10402	0.0204791
262951_at	protein walls are thin 1	WAT1	AT1G75500	WT-µg-LD	WT-1g-LD	1970.6	458.584	2.10338	0.00623771
263705_at	IMPL1 (MYO-INOSITOL MONOPHOSPHATASE LIKE 1); 3'(2'),5'-bisphosphate nucleotidase/ inositol or phosphatidylinositol phosphatase/ inositol-1(or 4)-monophosphatase	IMPL1	AT1G31190	WT-µg-LD	WT-1g-LD	692.519	161.171	2.10326	0.0303336
246268_at	CYP97A3 (CYTOCHROME P450-TYPE MONOOXYGENASE 97A3); carotene beta-ring hydroxylase/ oxygen binding	CYP97A3	AT1G31800	WT-µg-LD	WT-1g-LD	1081.75	251.812	2.10296	0.0070852
245242_at	CH1 (CHLORINA 1); chlorophyllide a oxygenase	CH1	AT1G44446	WT-µg-LD	WT-1g-LD	1982.45	462.089	2.10104	0.0115273
262569_at	MATE efflux family protein	AT1G15180	AT1G15180	WT-µg-LD	WT-1g-LD	224.467	52.3442	2.1004	0.00172592
257652_at	APUM24 (Arabidopsis Pumilio 24); RNA binding / binding	APUM24	AT3G16810	WT-µg-LD	WT-1g-LD	562.877	131.282	2.10015	0.00400684
247926_at	methyltransferase-like protein	AT5G57280	AT5G57280	WT-µg-LD	WT-1g-LD	545.554	127.281	2.0997	0.0529881
258009_at	RNA pseudourine synthase 4	AT3G19440	AT3G19440	WT-µg-LD	WT-1g-LD	141.627	33.0432	2.09967	0.0136664
245943_at	putative amino acid transporter	AT5G19500	AT5G19500	WT-µg-LD	WT-1g-LD	416.173	97.2486	2.09743	0.0219616
258506_at	agenet domain-containing protein	AT3G06520	AT3G06520	WT-µg-LD	WT-1g-LD	356.068	83.4148	2.09378	0.0122296
263824_at	transducin/WD-40 repeat-containing protein	AT2G40360	AT2G40360	WT-µg-LD	WT-1g-LD	1859.17	435.562	2.09371	0.00536385
253876_at	CIP7 (COP1-INTERACTING PROTEIN 7); transcription activator	CIP7	AT4G27430	WT-µg-LD	WT-1g-LD	162.663	38.1218	2.0932	0.0187811
264942_at	F-box protein	AT1G67340	AT1G67340	WT-µg-LD	WT-1g-LD	872.897	204.586	2.0931	0.0089944
249493_at	HXXXD-type acyl-transferase-like protein	AT5G39080	AT5G39080	WT-µg-LD	WT-1g-LD	621.343	145.665	2.09274	0.0125771
260935_at	tetrapyrrole (corrin/porphyrin)methylase	AT1G45110	AT1G45110	WT-µg-LD	WT-1g-LD	69.2635	16.2384	2.09269	0.0333033
263039_at	MAK16 protein-like protein	AT1G23280	AT1G23280	WT-µg-LD	WT-1g-LD	336.559	78.9256	2.09229	0.0138113
266589_at	myosin heavy chain-like protein	AT2G46250	AT2G46250	WT-µg-LD	WT-1g-LD	165.424	38.8168	2.09142	0.0401053
257149_at	ATPHB4 (PROHIBITIN 4)	ATPHB4	AT3G27280	WT-µg-LD	WT-1g-LD	469.179	110.215	2.08982	0.00535292
262028_at	transcription factor TCP23	AT1G35560	AT1G35560	WT-µg-LD	WT-1g-LD	357.977	84.1106	2.08951	0.0072016
246792_at	hypothetical protein	AT5G27290	AT5G27290	WT-µg-LD	WT-1g-LD	320.242	75.3106	2.08824	0.0404509
256216_at	CRT1 (CALRETICULIN 1); calcium ion binding / unfolded protein binding	CRT1	AT1G56340	WT-µg-LD	WT-1g-LD	5874.92	1381.72	2.0881	0.0142952
262594_at	60S ribosomal protein L37-1	AT1G15250	AT1G15250	WT-µg-LD	WT-1g-LD	786.476	185.314	2.08543	0.0513279
246439_at	RING-H2 finger protein ATL52	AT5G17600	AT5G17600	WT-µg-LD	WT-1g-LD	142.716	33.6354	2.0851	0.014304
258549_at	protein arginine N-methyltransferase family protein	PRMT4B	AT3G06930	WT-µg-LD	WT-1g-LD	281.228	66.3133	2.08437	0.00379558
259311_at	putative SAR DNA-binding protein	AT3G05060	AT3G05060	WT-µg-LD	WT-1g-LD	1184.12	279.218	2.08435	0.0501524
264895_at	GroES-like protein	AT1G23100	AT1G23100	WT-µg-LD	WT-1g-LD	116.287	27.4227	2.08425	0.0335155
246623_at	ATNUC-L1; nucleic acid binding / nucleotide binding	ATNUC-L1	AT1G48920	WT-µg-LD	WT-1g-LD	5391.86	1274.52	2.08083	0.00762188
247649_at	hypothetical protein	AT5G60030	AT5G60030	WT-µg-LD	WT-1g-LD	105.521	24.9779	2.0788	0.0137004
245770_at	hypothetical protein	AT1G30240	AT1G30240	WT-µg-LD	WT-1g-LD	199.988	47.3427	2.0787	0.0523562
261435_at	GTP-binding protein Obg/CgtA	AT1G07615	AT1G07615	WT-µg-LD	WT-1g-LD	144.432	34.2758	2.07513	0.0113825
262272_at	hypothetical protein	AT1G42440	AT1G42440	WT-µg-LD	WT-1g-LD	810.852	192.543	2.07426	0.0126194
249726_at	hypothetical protein	AT5G35480	AT5G35480	WT-µg-LD	WT-1g-LD	147.461	35.0356	2.07344	0.0115884
266239_at	mitochondrial import inner membrane translocase subunit Tim10	TIM10	AT2G29530	WT-µg-LD	WT-1g-LD	1127.21	268.189	2.07144	0.0121639
251713_at	probable methyltransferase PMT22	AT3G56080	AT3G56080	WT-µg-LD	WT-1g-LD	219.456	52.2751	2.06974	0.0166477
250418_at	transducin/WD40 domain-containing protein	AT5G11240	AT5G11240	WT-µg-LD	WT-1g-LD	418.324	99.7337	2.06847	0.036995
256678_at	CP33; RNA binding	CP33	AT3G52380	WT-µg-LD	WT-1g-LD	1747.19	416.869	2.06737	0.0391017
260106_at	dienelactone hydrolase-like protein	AT1G35420	AT1G35420	WT-µg-LD	WT-1g-LD	1169.59	279.321	2.066	0.0516342
256661_at	protein ribosomal RNA processing 5	AT3G11964	AT3G11964	WT-µg-LD	WT-1g-LD	490.251	117.237	2.06409	0.00710888
262160_at	putative thiol-disulfide oxidoreductase DCC	AT1G52590	AT1G52590	WT-µg-LD	WT-1g-LD	1024.27	245.388	2.06146	0.0478838
247946_at	CIA2 (CHLOROPLAST IMPORT APPARATUS 2); transcription regulator	CIA2	AT5G57180	WT-µg-LD	WT-1g-LD	222.968	53.4228	2.06131	0.0282352
261603_at	ATRBP47A (Arabidopsis thaliana RNA-binding protein 47a); RNA binding	ATRBP47A	AT1G49600	WT-µg-LD	WT-1g-LD	2319.39	556.85	2.05839	0.011249
254778_at	homeodomain-like transcriptional regulator	AT4G12750	AT4G12750	WT-µg-LD	WT-1g-LD	312.587	75.1251	2.05689	0.0546865
250353_at	protein NONRESPONDING TO OXYLIPINS 2	AT5G11630	AT5G11630	WT-µg-LD	WT-1g-LD	1079.14	259.77	2.05458	0.00586176
257033_at	ATPREP1 (PRESEQUENCE PROTEASE 1); metalloendopeptidase	ATPREP1	AT3G19170	WT-µg-LD	WT-1g-LD	2760.25	664.783	2.05384	0.0135516
254218_at	Leucine-rich repeat protein kinase family protein	AT4G23740	AT4G23740	WT-µg-LD	WT-1g-LD	124.142	29.9215	2.05274	0.016688
258474_at	pentatricopeptide repeat-containing protein	AT3G02650	AT3G02650	WT-µg-LD	WT-1g-LD	355.391	85.7222	2.05167	0.0147867
253687_at	hypothetical protein	AT4G29520	AT4G29520	WT-µg-LD	WT-1g-LD	2009.53	485.704	2.04871	0.00679187
263002_at	hypothetical protein	AT1G54200	AT1G54200	WT-µg-LD	WT-1g-LD	48.2266	11.6698	2.04705	0.0200236
252115_at	LTP5 (Lipid transfer protein 5); lipid transporter	LTP5	AT3G51600	WT-µg-LD	WT-1g-LD	8965.86	2169.82	2.04687	0.00682795
263954_at	putative sucrose-phosphatase 2	AT2G35840	AT2G35840	WT-µg-LD	WT-1g-LD	789.264	191.043	2.04661	0.0450242
249836_at	HMGB6; transcription factor	HMGB6	AT5G23420	WT-µg-LD	WT-1g-LD	109.379	26.5002	2.04526	0.0279017
254932_at	putative translation elongation factor Ts	AT4G11120	AT4G11120	WT-µg-LD	WT-1g-LD	431.298	104.535	2.04469	0.039458
267586_at	hypothetical protein	AT2G41950	AT2G41950	WT-µg-LD	WT-1g-LD	345.411	83.8209	2.04293	0.0233328
246157_at	NADH-cytochrome b5 reductase-like protein	AT5G20080	AT5G20080	WT-µg-LD	WT-1g-LD	1388.31	337.027	2.04239	0.0177866
261911_at	60S ribosomal protein L7-1	AT1G80750	AT1G80750	WT-µg-LD	WT-1g-LD	1426.62	346.344	2.04232	0.051424
266516_at	glutaredoxin-C13	AT2G47880	AT2G47880	WT-µg-LD	WT-1g-LD	826.766	200.848	2.04138	0.0296144
245512_at	RNA binding protein	AT4G15770	AT4G15770	WT-µg-LD	WT-1g-LD	1558.51	378.625	2.04133	0.0411063
263696_at	AK-HSDH I (ASPARTATE KINASE-HOMOSERINE DEHYDROGENASE I); aspartate kinase/ homoserine dehydrogenase	AK-HSDH I	AT1G31230	WT-µg-LD	WT-1g-LD	390.495	95.0422	2.03866	0.0229532
256905_at	HSP60 (HEAT SHOCK PROTEIN 60); ATP binding	HSP60	AT3G23990	WT-µg-LD	WT-1g-LD	1087.94	264.987	2.0376	0.0196108
266959_at	minichromosome maintenance family protein / MCM family protein	MCM5	AT2G07690	WT-µg-LD	WT-1g-LD	103.404	25.1901	2.03737	0.0245211
254130_at	AGL24 (AGAMOUS-LIKE 24); protein binding / protein heterodimerization/ protein homodimerization/ sequence-specific DNA binding / transcription factor	AGL24	AT4G24540	WT-µg-LD	WT-1g-LD	175.943	42.8774	2.03681	0.0093649
255874_at	ETG1 (E2F TARGET GENE 1)	ETG1	AT2G40550	WT-µg-LD	WT-1g-LD	245.292	59.7876	2.03659	0.0207538
248634_at	OVA2 (ovule abortion 2); ATP binding / aminoacyl-tRNA ligase/ catalytic/ isoleucine-tRNA ligase/ nucleotide binding	OVA2	AT5G49030	WT-µg-LD	WT-1g-LD	422.403	103.032	2.03553	0.00923071
253722_at	zinc finger CCCH domain-containing protein 49	AT4G29190	AT4G29190	WT-µg-LD	WT-1g-LD	6346.49	1549.73	2.03394	0.039271
251673_at	BG3 (BETA-1,3-GLUCANASE 3); cellulase/ hydrolase, hydrolyzing O-glycosyl compounds	BG3	AT3G57240	WT-µg-LD	WT-1g-LD	537.069	131.417	2.03096	0.00162095
263822_at	pentatricopeptide repeat-containing protein	AT2G40240	AT2G40240	WT-µg-LD	WT-1g-LD	57.6605	14.1158	2.03028	0.0457005
257636_at	CYP71B22; electron carrier/ heme binding / iron ion binding / monooxygenase/ oxygen binding	CYP71B22	AT3G26200	WT-µg-LD	WT-1g-LD	775.605	190.052	2.02893	0.0123797
246329_at	Spc97 / Spc98 family of spindle pole body (SBP) component	AT3G43610	AT3G43610	WT-µg-LD	WT-1g-LD	112.804	27.6479	2.02857	0.0341749
254076_at	peptidyl-prolyl cis-trans isomerase FKBP53	FKBP53	AT4G25340	WT-µg-LD	WT-1g-LD	727.234	178.269	2.02837	0.0162984
263987_at	phospholipase A1-IIdelta	AT2G42690	AT2G42690	WT-µg-LD	WT-1g-LD	2669.62	654.516	2.02813	0.0197826
248739_at	GFA2 (GAMETOPHYTIC FACTOR 2); heat shock protein binding / unfolded protein binding	GFA2	AT5G48030	WT-µg-LD	WT-1g-LD	924.577	226.996	2.02613	0.0072672
259173_at	BGLU25 (BETA GLUCOSIDASE 25); catalytic/ cation binding / hydrolase, hydrolyzing O-glycosyl compounds	BGLU25	AT3G03640	WT-µg-LD	WT-1g-LD	1125.38	276.353	2.02583	0.00893543
252688_at	thylakoid lumenal P17.1 protein	AT3G44020	AT3G44020	WT-µg-LD	WT-1g-LD	223.628	54.9462	2.02501	0.0286032
260704_at	probable glycine cleavage system H protein 2	AT1G32470	AT1G32470	WT-µg-LD	WT-1g-LD	2757.6	677.643	2.02482	0.0195325
267174_at	60S ribosomal protein L36-1	AT2G37600	AT2G37600	WT-µg-LD	WT-1g-LD	776.647	191.271	2.02164	0.0446138
245843_at	hypothetical protein	AT1G26180	AT1G26180	WT-µg-LD	WT-1g-LD	487.829	120.146	2.02158	0.0530485
253420_at	F-type H+-transporting ATPase subunit b	AT4G32260	AT4G32260	WT-µg-LD	WT-1g-LD	8271.9	2038.1	2.021	0.0456334
253875_at	early nodulin-like protein 2	ENODL2	AT4G27520	WT-µg-LD	WT-1g-LD	3417.3	842.11	2.02078	0.0519386
255290_at	ATPC1; enzyme regulator	ATPC1	AT4G04640	WT-µg-LD	WT-1g-LD	10500.1	2588.49	2.02022	0.0258356
258113_at	CYP72A11; electron carrier/ heme binding / iron ion binding / monooxygenase/ oxygen binding	CYP72A11	AT3G14650	WT-µg-LD	WT-1g-LD	899.693	221.959	2.01914	0.00676561
267018_at	SVR1 (SUPPRESSOR OF VARIEGATION 1); RNA binding / pseudouridine synthase	SVR1	AT2G39140	WT-µg-LD	WT-1g-LD	312.558	77.1409	2.01856	0.00761237
264731_at	mitochondrial transcription termination factor family protein	AT1G62150	AT1G62150	WT-µg-LD	WT-1g-LD	182.214	44.9921	2.01789	0.0081444
263265_at	hypothetical protein	AT2G38820	AT2G38820	WT-µg-LD	WT-1g-LD	3214.27	793.976	2.01733	0.00986245
248948_at	ENHANCED DISEASE RESISTANCE 2-like protein	AT5G45560	AT5G45560	WT-µg-LD	WT-1g-LD	92.1694	22.7694	2.01719	0.0381425
255403_at	DFL2 (DWARF IN LIGHT 2)	DFL2	AT4G03400	WT-µg-LD	WT-1g-LD	272.811	67.4149	2.01676	0.0150778
258840_at	DUO1-activated nucleic acid binding protein	AT3G04620	AT3G04620	WT-µg-LD	WT-1g-LD	185.38	45.857	2.01527	0.023087
260831_at	monothiol glutaredoxin-S11	AT1G06830	AT1G06830	WT-µg-LD	WT-1g-LD	177.758	43.9745	2.01517	0.0288221
249945_at	60S ribosomal protein L10a-3	AT5G22440	AT5G22440	WT-µg-LD	WT-1g-LD	1783.39	441.46	2.01427	0.00679571
253362_s_at	putative (S)-coclaurine-N-methyltransferase /// S-adenosyl-L-methionine-dependent methyltransferases superfamily protein	AT4G33110 /// AT4G33120	AT4G33110 /// AT4G33120	WT-µg-LD	WT-1g-LD	533.707	132.187	2.01347	0.0371374
251665_at	ARR9 (RESPONSE REGULATOR 9); transcription regulator/ two-component response regulator	ARR9	AT3G57040	WT-µg-LD	WT-1g-LD	364.075	90.2584	2.0121	0.00627941
251830_at	PUR5; ATP binding / phosphoribosylformylglycinamidine cyclo-ligase	PUR5	AT3G55010	WT-µg-LD	WT-1g-LD	584.625	144.937	2.01209	0.00401112
259633_at	haloacid dehalogenase-like hydrolase family protein	AT1G56500	AT1G56500	WT-µg-LD	WT-1g-LD	673.764	167.425	2.00873	0.034324
250937_at	hypothetical protein	AT5G03230	AT5G03230	WT-µg-LD	WT-1g-LD	2853.18	709.162	2.00838	0.0262398
258837_at	60S ribosomal protein L13a-1	AT3G07110	AT3G07110	WT-µg-LD	WT-1g-LD	6273.39	1560.76	2.00699	0.00822295
262878_at	NDF2 (NDH-DEPENDENT CYCLIC ELECTRON FLOW 1)	NDF2	AT1G64770	WT-µg-LD	WT-1g-LD	782.189	194.81	2.00545	0.0166918
253549_at	NFD1 (NUCLEAR FUSION DEFECTIVE 1); RNA binding / structural constituent of ribosome	NFD1	AT4G30930	WT-µg-LD	WT-1g-LD	526.2	131.185	2.00401	0.0506876
262861_at	MATE efflux family protein	AT1G64820	AT1G64820	WT-µg-LD	WT-1g-LD	112.372	28.0476	2.00233	0.0457938
249162_at	hypothetical protein	AT5G42765	AT5G42765	WT-µg-LD	WT-1g-LD	478.809	119.522	2.00218	0.0339358
251068_at	STN8; kinase/ protein kinase	STN8	AT5G01920	WT-µg-LD	WT-1g-LD	464.493	115.971	2.00189	0.0280991
246266_at	NFD3 (NUCLEAR FUSION DEFECTIVE 3); structural constituent of ribosome	NFD3	AT1G31817	WT-µg-LD	WT-1g-LD	354.326	88.4907	2.00148	0.0238168
253518_at	protein CTF7	CTF7	AT4G31400	WT-µg-LD	WT-1g-LD	79.5565	19.8708	2.00133	0.0380106
254412_at	B160; protein binding / transcription factor/ zinc ion binding	B160	AT4G21430	WT-µg-LD	WT-1g-LD	224.671	56.1216	2.00118	0.0400367
253189_at	Nucleotide-sugar transporter family protein	AT4G35335	AT4G35335	WT-µg-LD	WT-1g-LD	242.255	60.5442	2.00046	0.0151398
250102_at	LRR1; ATP binding / kinase/ protein serine/threonine kinase	LRR1	AT5G16590	WT-µg-LD	WT-1g-LD	225.846	56.4832	1.99944	0.0152288
251546_at	haloacid dehalogenase-like hydrolase domain-containing protein	AT3G58830	AT3G58830	WT-µg-LD	WT-1g-LD	336.92	84.3734	1.99755	0.0138832
261867_at	putative lysine decarboxylase	AT1G50575	AT1G50575	WT-µg-LD	WT-1g-LD	508.329	127.339	1.99709	0.007624
252409_at	DnaJ/Hsp40 cysteine-rich domain-containing protein	AT3G47650	AT3G47650	WT-µg-LD	WT-1g-LD	5332.2	1336.12	1.99668	0.0180691
252888_at	APL3; glucose-1-phosphate adenylyltransferase	APL3	AT4G39210	WT-µg-LD	WT-1g-LD	244.82	61.4046	1.9953	0.0287446
266924_at	eukaryotic initiation factor 3 gamma subunit family protein	AT2G45730	AT2G45730	WT-µg-LD	WT-1g-LD	702.271	176.226	1.9946	0.00847028
254743_at	HAK5 (HIGH AFFINITY K+ TRANSPORTER 5); potassium ion transmembrane transporter/ potassium:sodium symporter	HAK5	AT4G13420	WT-µg-LD	WT-1g-LD	63.03	15.8267	1.99368	0.0379342
246468_at	UGT78D2 (UDP-GLUCOSYL TRANSFERASE 78D2); UDP-glycosyltransferase/ anthocyanidin 3-O-glucosyltransferase/ quercetin 3-O-glucosyltransferase/ transferase, transferring glycosyl groups	UGT78D2	AT5G17050	WT-µg-LD	WT-1g-LD	899.359	225.846	1.99356	0.0088596
247943_at	Tautomerase/MIF superfamily protein	AT5G57170	AT5G57170	WT-µg-LD	WT-1g-LD	326.297	82.013	1.99226	0.00849465
254016_at	CGA1 (CYTOKININ-RESPONSIVE GATA FACTOR 1); transcription factor	CGA1	AT4G26150	WT-µg-LD	WT-1g-LD	429.211	107.893	1.99209	0.0273393
262342_at	hypothetical protein	AT1G64150	AT1G64150	WT-µg-LD	WT-1g-LD	389.625	98.0974	1.9898	0.0546321
255465_at	mitochondrial transcription termination factor-like protein BELAYA SMERT	AT4G02990	AT4G02990	WT-µg-LD	WT-1g-LD	366.788	92.3824	1.98926	0.00548894
265699_at	probable carboxylesterase 7	AT2G03550	AT2G03550	WT-µg-LD	WT-1g-LD	484.101	122.076	1.98752	0.00744733
253728_at	60S ribosomal protein L28-2	AT4G29410	AT4G29410	WT-µg-LD	WT-1g-LD	4163.53	1050.2	1.98714	0.031058
259981_at	photosystem II reaction center PsbP family protein	AT1G76450	AT1G76450	WT-µg-LD	WT-1g-LD	1277.76	322.421	1.9866	0.0516661
253233_at	SWIB/MDM2 domain-containing protein	AT4G34290	AT4G34290	WT-µg-LD	WT-1g-LD	618.689	156.162	1.98617	0.0041892
267299_at	UDP-glycosyltransferase 87A1	AT2G30150	AT2G30150	WT-µg-LD	WT-1g-LD	340.919	86.1057	1.98525	0.012949
251371_at	EDA14 (EMBRYO SAC DEVELOPMENT ARREST 14)	EDA14	AT3G60360	WT-µg-LD	WT-1g-LD	413.171	104.386	1.98481	0.0411127
251956_at	CP29; RNA binding / poly(U) binding	CP29	AT3G53460	WT-µg-LD	WT-1g-LD	3439.77	869.85	1.98347	0.040071
246269_at	zinc-finger domain of monoamine-oxidase A repressor R1	AT4G37110	AT4G37110	WT-µg-LD	WT-1g-LD	69.5847	17.603	1.98295	0.0289171
265623_at	hypothetical protein	AT2G27270	AT2G27270	WT-µg-LD	WT-1g-LD	234.394	59.3579	1.98143	0.0351552
253208_at	pentatricopeptide repeat protein MRL1	MRL1	AT4G34830	WT-µg-LD	WT-1g-LD	689.423	174.599	1.98135	0.0118476
256002_at	CARB (CARBAMOYL PHOSPHATE SYNTHETASE B); ATP binding / carbamoyl-phosphate synthase/ catalytic	CARB	AT1G29900	WT-µg-LD	WT-1g-LD	1023.12	259.47	1.97934	0.00539695
254355_at	ribosomal protein L7Ae/L30e/S12e/Gadd45 family protein	AT4G22380	AT4G22380	WT-µg-LD	WT-1g-LD	588.964	149.856	1.9746	0.0172657
255829_at	KT2 (POTASSIUM TRANSPORTER 2); potassium ion transmembrane transporter	KT2	AT2G40540	WT-µg-LD	WT-1g-LD	341.783	87.1413	1.97165	0.0194219
266207_at	NAD(P)-linked oxidoreductase superfamily protein	AT2G27680	AT2G27680	WT-µg-LD	WT-1g-LD	2083.07	531.195	1.97139	0.0514992
264837_at	photosystem II Psb27 protein	PSB27	AT1G03600	WT-µg-LD	WT-1g-LD	4838.17	1233.84	1.9713	0.0130903
249927_at	APL1 (ADP GLUCOSE PYROPHOSPHORYLASE LARGE SUBUNIT 1); glucose-1-phosphate adenylyltransferase	APL1	AT5G19220	WT-µg-LD	WT-1g-LD	1492.81	380.738	1.97115	0.0416777
258738_at	hypothetical protein	AT3G05750	AT3G05750	WT-µg-LD	WT-1g-LD	103.558	26.4338	1.96998	0.0257873
246210_at	ribosomal protein L12 family protein	AT4G36420	AT4G36420	WT-µg-LD	WT-1g-LD	246.872	63.0288	1.96968	0.00889328
248655_at	60S ribosomal protein L13a-4	AT5G48760	AT5G48760	WT-µg-LD	WT-1g-LD	1542.75	393.924	1.96952	0.0333888
251744_at	hypothetical protein	AT3G56010	AT3G56010	WT-µg-LD	WT-1g-LD	1463.67	373.759	1.96941	0.0522941
253635_at	hypothetical protein	AT4G30620	AT4G30620	WT-µg-LD	WT-1g-LD	387.583	99.0894	1.9677	0.0032242
252305_at	emb1796 (embryo defective 1796); ATP binding	emb1796	AT3G49240	WT-µg-LD	WT-1g-LD	143.405	36.6781	1.9671	0.000994053
256336_at	Acyl-CoA N-acyltransferases-like protein	AT1G72030	AT1G72030	WT-µg-LD	WT-1g-LD	1291.9	330.909	1.96499	0.00965464
265270_at	ribose-phosphate pyrophosphokinase 4	AT2G42910	AT2G42910	WT-µg-LD	WT-1g-LD	1496.42	383.431	1.96447	0.0059607
253855_at	TET7 (TETRASPANIN7)	TET7	AT4G28050	WT-µg-LD	WT-1g-LD	210.452	53.9627	1.96345	0.0341726
262377_at	P-loop containing nucleoside triphosphate hydrolases superfamily protein	AT1G73110	AT1G73110	WT-µg-LD	WT-1g-LD	749.549	192.327	1.96247	0.0181867
266748_at	SPL1 (SQUAMOSA PROMOTER BINDING PROTEIN-LIKE 1); DNA binding / transcription factor	SPL1	---	WT-µg-LD	WT-1g-LD	193.677	49.7496	1.9609	0.0131511
259775_at	hypothetical protein	AT1G29530	AT1G29530	WT-µg-LD	WT-1g-LD	272.732	70.0956	1.96009	0.014022
256825_at	CWLP (CELL WALL-PLASMA MEMBRANE LINKER PROTEIN); lipid binding	CWLP	AT3G22120	WT-µg-LD	WT-1g-LD	7070.5	1818.23	1.95928	0.012307
246387_at	hypothetical protein	AT1G77400	AT1G77400	WT-µg-LD	WT-1g-LD	209	53.9113	1.95484	0.012519
266363_at	haloacid dehalogenase-like hydrolase domain-containing protein	AT2G41250	AT2G41250	WT-µg-LD	WT-1g-LD	7629.27	1968.61	1.95437	0.0183374
256753_at	GHS1 (GLUCOSE HYPERSENSITIVE 1); structural constituent of ribosome	GHS1	AT3G27160	WT-µg-LD	WT-1g-LD	1549.48	400.803	1.95082	0.00179329
261801_at	AAE14 (Acyl-Activating Enzyme 14); AMP binding / o-succinylbenzoate-CoA ligase	AAE14	AT1G30520	WT-µg-LD	WT-1g-LD	199.41	51.6093	1.95003	0.0230856
248538_at	S-adenosyl-L-methionine-dependent methyltransferases superfamily protein	AT5G50110	AT5G50110	WT-µg-LD	WT-1g-LD	288.186	74.6095	1.94957	0.0254295
253890_s_at	SPFH/Band 7/PHB domain-containing membrane-associated protein /// SPFH/Band 7/PHB domain-containing membrane-associated protein	AT4G27585 /// AT5G54100	AT4G27585 /// AT5G54100	WT-µg-LD	WT-1g-LD	526.889	136.529	1.9483	0.00805113
261536_at	KEA1 (K EFFLUX ANTIPORTER 1); potassium ion transmembrane transporter/ potassium:hydrogen antiporter	KEA1	AT1G01790	WT-µg-LD	WT-1g-LD	1394.48	361.507	1.94763	0.016413
266942_at	TXND9 (THIOREDOXIN DOMAIN-CONTAINING PROTEIN 9 HOMOLOG)	TXND9	AT2G18990	WT-µg-LD	WT-1g-LD	121.916	31.6063	1.9476	0.00808255
263678_at	NAD(P)-linked oxidoreductase superfamily protein	AT1G04420	AT1G04420	WT-µg-LD	WT-1g-LD	1241.77	322.29	1.94596	0.00562511
260250_at	PUR4 (purine biosynthesis 4); ATP binding / catalytic/ phosphoribosylformylglycinamidine synthase	PUR4	AT1G74260	WT-µg-LD	WT-1g-LD	1095.7	284.518	1.94526	0.0544864
247025_at	ABA1 (ABA DEFICIENT 1); zeaxanthin epoxidase	ABA1	AT5G67030	WT-µg-LD	WT-1g-LD	4639.87	1206.1	1.94373	0.0124305
261947_at	ubiquitin-like protein	AT1G64470	AT1G64470	WT-µg-LD	WT-1g-LD	527.865	137.236	1.94351	0.0038728
249092_at	putative alpha-mannosidase I MNS4	AT5G43710	AT5G43710	WT-µg-LD	WT-1g-LD	156.618	40.7218	1.94338	0.0291054
257717_at	EMB1865 (embryo defective 1865); RNA binding	EMB1865	AT3G18390	WT-µg-LD	WT-1g-LD	372.258	96.801	1.94321	0.024139
251996_at	BGAL2 (beta-galactosidase 2); beta-galactosidase/ catalytic/ cation binding	BGAL2	AT3G52840	WT-µg-LD	WT-1g-LD	338.554	88.0767	1.94255	0.0293285
249331_at	RPL27 (RIBOSOMAL PROTEIN LARGE SUBUNIT 27); structural constituent of ribosome	RPL27	AT5G40950	WT-µg-LD	WT-1g-LD	5066.15	1318.44	1.94205	0.0039946
253411_at	ATH1 (ARABIDOPSIS THALIANA HOMEOBOX GENE 1); DNA binding / sequence-specific DNA binding / transcription factor	ATH1	AT4G32980	WT-µg-LD	WT-1g-LD	75.0604	19.5587	1.94024	0.0157611
264929_at	probable aldo-keto reductase 5	AT1G60730	AT1G60730	WT-µg-LD	WT-1g-LD	1656.96	431.899	1.93977	0.037709
261797_at	cyclin/Brf1-like TBP-binding domain-containing protein	AT1G30455	AT1G30455	WT-µg-LD	WT-1g-LD	58.9274	15.3854	1.93737	0.0387285
244997_at	RNA polymerase beta'' chain	rpoC2	ATCG00170	WT-µg-LD	WT-1g-LD	1256.1	327.973	1.93731	0.00352609
256268_at	RBR1 (RETINOBLASTOMA-RELATED 1); transcription factor binding	RBR1	AT3G12280	WT-µg-LD	WT-1g-LD	1021.67	267.105	1.93545	0.037008
260896_at	SecY protein transport family protein	AT1G29310	AT1G29310	WT-µg-LD	WT-1g-LD	2121	554.613	1.93519	0.0250426
256207_at	nucleolar GTP-binding protein 1	AT1G50920	AT1G50920	WT-µg-LD	WT-1g-LD	1907.74	499.235	1.93407	0.00987861
258359_s_at	peroxisomal (S)-2-hydroxy-acid oxidase GLO2 /// peroxisomal (S)-2-hydroxy-acid oxidase GLO1	AT3G14415 /// AT3G14420	AT3G14415 /// AT3G14420	WT-µg-LD	WT-1g-LD	10022.1	2623.57	1.93358	0.0304111
264974_at	ATHB54 (ARABIDOPSIS THALIANA HOMEOBOX PROTEIN 54); nucleic acid binding / transcription factor	ATHB54	AT1G27050	WT-µg-LD	WT-1g-LD	314.39	82.3596	1.93255	0.0175619
252362_at	RNA binding	PDE312	AT3G48500	WT-µg-LD	WT-1g-LD	394.52	103.364	1.93236	0.00285406
261664_s_at	MEE67 (maternal effect embryo arrest 67); P-P-bond-hydrolysis-driven protein transmembrane transporter/ protein transporter	MEE67	AT1G18320 /// AT3G10110	WT-µg-LD	WT-1g-LD	190.087	49.8155	1.93199	0.0220774
264457_at	UDP-glycosyltransferase 90A2	AT1G10400	AT1G10400	WT-µg-LD	WT-1g-LD	156.677	41.1497	1.92884	0.0361729
256822_at	IQD5 (IQ-domain 5); calmodulin binding	IQD5	AT3G22190	WT-µg-LD	WT-1g-LD	176.411	46.3911	1.92702	0.00903112
261979_at	NIA2 (NITRATE REDUCTASE 2); nitrate reductase (NADH)/ nitrate reductase	NIA2	AT1G37130	WT-µg-LD	WT-1g-LD	19956.1	5253.33	1.92553	0.0245052
253272_at	SEP1 (STRESS ENHANCED PROTEIN 1); chlorophyll binding	43709	AT4G34190	WT-µg-LD	WT-1g-LD	3575.86	943.087	1.92283	0.0268663
256816_at	hypothetical protein	AT3G21400	AT3G21400	WT-µg-LD	WT-1g-LD	152.569	40.2551	1.92221	0.0235301
246673_at	RPS1 (RIBOSOMAL PROTEIN S1); RNA binding / structural constituent of ribosome	RPS1	AT5G30510	WT-µg-LD	WT-1g-LD	5571.92	1470.55	1.92182	0.00912171
262717_s_at	CYP79F2; oxidoreductase, acting on paired donors, with incorporation or reduction of molecular oxygen, NADH or NADPH as one donor, and incorporation of one atom of oxygen / oxygen binding	CYP79F2	AT1G16400 /// AT1G16410	WT-µg-LD	WT-1g-LD	88.6413	23.4123	1.92071	0.0371293
249830_at	PYRD (pyrimidine d); dihydroorotate dehydrogenase	PYRD	AT5G23300	WT-µg-LD	WT-1g-LD	223.715	59.0899	1.92068	0.0172627
255791_at	DAL1 (DIFFERENTIATION AND GREENING-LIKE 1)	DAL1	AT2G33430	WT-µg-LD	WT-1g-LD	819.66	216.519	1.92053	0.0412987
264372_at	ATGLX1 (GLYOXALASE I HOMOLOG); lactoylglutathione lyase/ metal ion binding	ATGLX1	AT1G11840	WT-µg-LD	WT-1g-LD	1594.79	421.518	1.9197	0.00923321
253116_at	pentatricopeptide repeat-containing protein	AT4G35850	AT4G35850	WT-µg-LD	WT-1g-LD	561.447	148.483	1.91885	0.0143622
258987_at	copper chaperone SCO1-like protein HCC1	AT3G08950	AT3G08950	WT-µg-LD	WT-1g-LD	609.311	161.254	1.91785	0.00550834
245118_at	NTRC (NADPH-DEPENDENT THIOREDOXIN REDUCTASE C); thioredoxin-disulfide reductase	NTRC	AT2G41680	WT-µg-LD	WT-1g-LD	1738.39	460.333	1.917	0.0323995
266313_at	CIPK3 (CBL-INTERACTING PROTEIN KINASE 3); kinase/ protein kinase/ protein serine/threonine kinase	CIPK3	AT2G26980	WT-µg-LD	WT-1g-LD	1442.99	382.398	1.91592	0.0382473
253758_at	emb2726 (embryo defective 2726); RNA binding / translation elongation factor	emb2726	AT4G29060	WT-µg-LD	WT-1g-LD	1668.6	442.326	1.91545	0.0189328
253286_at	FUC95A; 1,2-alpha-L-fucosidase	FUC95A	AT4G34260	WT-µg-LD	WT-1g-LD	468.139	124.244	1.91376	0.00931813
260294_at	putative GMP synthase / glutamine amidotransferase	AT1G63660	AT1G63660	WT-µg-LD	WT-1g-LD	678.23	180.05	1.91338	0.00742126
252318_at	GSA2 (glutamate-1-semialdehyde 2,1-aminomutase 2); catalytic/ glutamate-1-semialdehyde 2,1-aminomutase/ pyridoxal phosphate binding / transaminase	GSA2	AT3G48730	WT-µg-LD	WT-1g-LD	784.219	208.325	1.91242	0.0518733
246549_at	core-2/I-branching beta-1,6-N-acetylglucosaminyltransferase family protein	AT5G15050	AT5G15050	WT-µg-LD	WT-1g-LD	280.432	74.5329	1.9117	0.0400535
250733_at	2-Cys Prx B (2-Cysteine peroxiredoxin B); antioxidant/ peroxiredoxin	2-Cys Prx B	AT5G06290	WT-µg-LD	WT-1g-LD	1629.12	433.113	1.91128	0.0456517
246594_at	P5CR (PYRROLINE-5- CARBOXYLATE (P5C) REDUCTASE); pyrroline-5-carboxylate reductase	P5CR	AT5G14800	WT-µg-LD	WT-1g-LD	2336.42	621.927	1.90948	0.0373169
249118_at	hypothetical protein	AT5G43870	AT5G43870	WT-µg-LD	WT-1g-LD	82.6507	22.0054	1.90917	0.0173636
245414_at	hypothetical protein	AT4G17310	AT4G17310	WT-µg-LD	WT-1g-LD	339.519	90.4484	1.90833	0.0172835
250985_at	pentatricopeptide repeat-containing protein	AT5G02830	AT5G02830	WT-µg-LD	WT-1g-LD	450.587	120.047	1.9082	0.00538771
261810_at	ATLIG1 (ARABIDOPSIS THALIANA DNA LIGASE 1); ATP binding / DNA binding / DNA ligase (ATP)	ATLIG1	AT1G08130	WT-µg-LD	WT-1g-LD	157.343	41.9718	1.90642	0.0136325
265667_at	NF-YB11 (NUCLEAR FACTOR Y, SUBUNIT B11); transcription factor	NF-YB11	AT2G27470	WT-µg-LD	WT-1g-LD	101.012	26.9773	1.90471	0.0353971
256655_at	protein TIC 62	AT3G18890	AT3G18890	WT-µg-LD	WT-1g-LD	164.125	43.8608	1.9038	0.0108701
247040_at	HXXXD-type acyl-transferase-like protein	AT5G67150	AT5G67150	WT-µg-LD	WT-1g-LD	89.3072	23.8941	1.90212	0.0297396
260014_at	HPR; glycerate dehydrogenase/ poly(U) binding	HPR	AT1G68010	WT-µg-LD	WT-1g-LD	7768.34	2078.99	1.90172	0.0130526
246503_at	40S ribosomal protein S7-3	AT5G16130	AT5G16130	WT-µg-LD	WT-1g-LD	4872.4	1304.77	1.90083	0.00778046
250926_at	nucleobase:cation symporter-1	AT5G03555	AT5G03555	WT-µg-LD	WT-1g-LD	945.229	253.235	1.90019	0.0098478
263912_at	SBE2.1 (starch branching enzyme 2.1); 1,4-alpha-glucan branching enzyme	SBE2.1	AT2G36390	WT-µg-LD	WT-1g-LD	649.527	174.157	1.899	0.0142638
255749_at	STRS1 (STRESS RESPONSE SUPPRESSOR 1); ATP binding / ATP-dependent helicase/ helicase/ nucleic acid binding	STRS1	AT1G31970	WT-µg-LD	WT-1g-LD	1950.34	522.969	1.89893	0.0120076
249932_at	hypothetical protein	AT5G22390	AT5G22390	WT-µg-LD	WT-1g-LD	205.397	55.0904	1.89854	0.0156585
255685_s_at	amino acid dehydrogenase family protein /// Amino acid dehydrogenase family protein	AT4G00600 /// AT4G00620	AT4G00600 /// AT4G00620	WT-µg-LD	WT-1g-LD	394.095	105.778	1.89751	0.0378511
259603_at	haloacid dehalogenase-like hydrolase family protein	AT1G56500	AT1G56500	WT-µg-LD	WT-1g-LD	1128.98	303.053	1.89738	0.0378406
255224_at	copper ion binding protein	AT4G05400	AT4G05400	WT-µg-LD	WT-1g-LD	219.133	58.8587	1.89648	0.0173224
262118_at	BGLU11 (BETA GLUCOSIDASE 11); catalytic/ cation binding / hydrolase, hydrolyzing O-glycosyl compounds	BGLU11	AT1G02850	WT-µg-LD	WT-1g-LD	2624.41	706.085	1.89408	0.0459384
258386_at	peptidyl-prolyl cis-trans isomerase CYP37	AT3G15520	AT3G15520	WT-µg-LD	WT-1g-LD	258.422	69.5332	1.89395	0.0019503
256204_at	POLGAMMA2 (polymerase gamma 2); DNA binding / DNA-directed DNA polymerase	POLGAMMA2	AT1G50840	WT-µg-LD	WT-1g-LD	313.531	84.512	1.89138	0.00502585
265967_at	nodulin MtN21 /EamA-like transporter family protein	AT2G37450	AT2G37450	WT-µg-LD	WT-1g-LD	254.465	68.6488	1.89016	0.0289255
262611_at	GCK domain-containing protein	AT1G14060	AT1G14060	WT-µg-LD	WT-1g-LD	280.211	75.6654	1.88881	0.0108736
266321_at	CYP78A6; electron carrier/ heme binding / iron ion binding / monooxygenase/ oxygen binding	CYP78A6	AT2G46660	WT-µg-LD	WT-1g-LD	111.154	30.0267	1.88824	0.0156128
255586_at	MEE49 (maternal effect embryo arrest 49)	MEE49	AT4G01560	WT-µg-LD	WT-1g-LD	1010.49	273.051	1.88781	0.00875687
262504_at	ATPDIL1-1 (PDI-LIKE 1-1); protein disulfide isomerase	ATPDIL1-1	AT1G21750	WT-µg-LD	WT-1g-LD	8462.85	2287.37	1.88745	0.0457616
261206_at	Nucleic acid-binding, OB-fold-like protein	AT1G12800	AT1G12800	WT-µg-LD	WT-1g-LD	811.888	219.457	1.88734	0.0448332
267308_at	[acyl-carrier-protein] S-malonyltransferase	AT2G30200	AT2G30200	WT-µg-LD	WT-1g-LD	580	156.794	1.88718	0.00960098
247386_at	emb2746 (embryo defective 2746); DNA binding / catalytic/ hydrolase	emb2746	AT5G63420	WT-µg-LD	WT-1g-LD	416.125	112.553	1.88641	0.0146994
265742_at	ribose 5-phosphate isomerase A	RPI2	AT2G01290	WT-µg-LD	WT-1g-LD	1176.59	318.245	1.8864	0.0265125
246767_at	mitochondrial inner membrane translocase complex, subunit Tim44-related protein	AT5G27395	AT5G27395	WT-µg-LD	WT-1g-LD	439.08	118.799	1.88597	0.00802388
245558_at	ERD (early-responsive to dehydration stress) family protein	AT4G15430	AT4G15430	WT-µg-LD	WT-1g-LD	352.359	95.3617	1.88556	0.00673985
265154_at	GTP-binding family protein	AT1G30960	AT1G30960	WT-µg-LD	WT-1g-LD	127.368	34.5061	1.88409	0.0427108
249434_at	GTP-binding protein	AT5G39960	AT5G39960	WT-µg-LD	WT-1g-LD	155.095	42.0435	1.8832	0.0114478
262880_at	ribosomal protein S5 family protein	AT1G64880	AT1G64880	WT-µg-LD	WT-1g-LD	717.221	194.62	1.88176	0.00913533
248743_at	hypothetical protein	AT5G48240	AT5G48240	WT-µg-LD	WT-1g-LD	419.658	113.942	1.88091	0.000861569
265966_at	chloroplast RNA binding protein	AT2G37220	AT2G37220	WT-µg-LD	WT-1g-LD	4105.06	1116.14	1.87889	0.0496054
261338_at	hypothetical protein	AT1G44920	AT1G44920	WT-µg-LD	WT-1g-LD	948.667	258.159	1.87764	0.0335339
257912_at	AFH1 (FORMIN HOMOLOGY 1); actin binding / actin filament binding / protein binding	AFH1	AT3G25500	WT-µg-LD	WT-1g-LD	219.286	59.6778	1.87754	0.00594687
245198_at	hypothetical protein	AT1G67700	AT1G67700	WT-µg-LD	WT-1g-LD	2520.91	686.237	1.87717	0.00643115
259231_at	PP2CA (ARABIDOPSIS THALIANA PROTEIN PHOSPHATASE 2CA); protein binding / protein serine/threonine phosphatase	PP2CA	AT3G11410	WT-µg-LD	WT-1g-LD	8610.79	2345.03	1.87654	0.0187582
264801_at	emb2411 (embryo defective 2411); ATP binding / ATP-dependent DNA helicase/ DNA binding	emb2411	AT1G08840	WT-µg-LD	WT-1g-LD	114.387	31.1549	1.8764	0.0332007
261133_at	Mannose-binding lectin superfamily protein	AT1G19715	AT1G19715	WT-µg-LD	WT-1g-LD	398.982	108.708	1.87586	0.0137072
264286_at	PPR336 (pentatricopeptide repeat 336)	PPR336	AT1G61870	WT-µg-LD	WT-1g-LD	485.66	132.369	1.87538	0.0060989
252215_at	KICP-02; ATP binding / microtubule motor	KICP-02	AT3G50240	WT-µg-LD	WT-1g-LD	77.27	21.069	1.87478	0.0267241
247277_at	DNA polymerase V family protein	AT5G64420	AT5G64420	WT-µg-LD	WT-1g-LD	556.667	151.827	1.87438	0.0333446
261306_at	AT hook motif-containing protein	AT1G48610	AT1G48610	WT-µg-LD	WT-1g-LD	106.595	29.0882	1.87363	0.0308948
260898_at	50S ribosomal protein L34	AT1G29070	AT1G29070	WT-µg-LD	WT-1g-LD	3320.39	906.649	1.87274	0.0431858
263447_s_at	ATX2 (ARABIDOPSIS TRITHORAX-LIKE PROTEIN 2); DNA binding / histone methyltransferase(H3-K4 specific)	ATX2	AT1G05830 /// AT2G31650	WT-µg-LD	WT-1g-LD	138.443	37.8289	1.87173	0.0130066
258897_at	defensin-like protein 205	AT3G05730	AT3G05730	WT-µg-LD	WT-1g-LD	454.242	124.167	1.87118	0.0241358
252876_at	haloacid dehalogenase-like hydrolase family protein	AT4G39970	AT4G39970	WT-µg-LD	WT-1g-LD	456.923	124.977	1.87029	0.0321877
246457_at	TOZ (TORMOZEMBRYO DEFECTIVE); nucleotide binding	TOZ	AT5G16750	WT-µg-LD	WT-1g-LD	470.796	128.827	1.86967	0.0328174
265258_at	hypothetical protein	AT2G20390	AT2G20390	WT-µg-LD	WT-1g-LD	656.227	179.598	1.86942	0.0102602
252922_at	putative RNA-binding protein containing KH domain	AT4G39040	AT4G39040	WT-µg-LD	WT-1g-LD	996.197	272.905	1.86803	0.0217521
263433_at	MIPS2 (MYO-INOSITOL-1-PHOSTPATE SYNTHASE 2); binding / catalytic/ inositol-3-phosphate synthase	MIPS2	AT2G22240	WT-µg-LD	WT-1g-LD	235.07	64.4007	1.86794	0.00725687
246633_at	Leucine-rich repeat transmembrane protein kinase	AT1G29720	AT1G29720	WT-µg-LD	WT-1g-LD	249.349	68.3296	1.86758	0.00973403
246484_at	regulator of chromosome condensation repeat-containing protein	AT5G16040	AT5G16040	WT-µg-LD	WT-1g-LD	168.754	46.2508	1.86737	0.022034
257044_at	ARC5 (ACCUMULATION AND REPLICATION OF CHLOROPLAST 5); GTP binding / GTPase	ARC5	AT3G19720	WT-µg-LD	WT-1g-LD	484.199	132.929	1.86495	0.0476122
255788_at	IAA13; transcription factor	IAA13	AT2G33310	WT-µg-LD	WT-1g-LD	780.68	214.391	1.86449	0.00473248
254134_at	argininosuccinate synthase	AT4G24830	AT4G24830	WT-µg-LD	WT-1g-LD	614.041	168.67	1.86413	0.0160809
257680_at	aspartate carbamoyltransferase	PYRB	AT3G20330	WT-µg-LD	WT-1g-LD	1042.35	286.396	1.86376	0.00953487
266338_at	GLR5 (GLUTAMATE RECEPTOR 5); intracellular ligand-gated ion channel	GLR5	AT2G32400	WT-µg-LD	WT-1g-LD	198.241	54.5079	1.86272	0.00604809
259757_at	ATPDIL1-2 (PDI-LIKE 1-2); protein disulfide isomerase	ATPDIL1-2	AT1G77510	WT-µg-LD	WT-1g-LD	3817.47	1049.8	1.8625	0.000325376
249415_at	CDF2 (CYCLING DOF FACTOR 2); DNA binding / protein binding / transcription factor	CDF2	AT5G39660	WT-µg-LD	WT-1g-LD	1953.73	537.47	1.86198	0.0421544
249901_at	HD2B (HISTONE DEACETYLASE 2B); histone deacetylase	HD2B	AT5G22650	WT-µg-LD	WT-1g-LD	2556.91	703.919	1.86092	0.00799053
248001_at	CBL2 (CALCINEURIN B-LIKE 2); calcium ion binding	CBL2	AT5G55990	WT-µg-LD	WT-1g-LD	1299.98	358.083	1.86012	0.00584461
267078_at	Single-stranded nucleic acid binding R3H protein	AT2G40960	AT2G40960	WT-µg-LD	WT-1g-LD	224.89	61.9856	1.85921	0.00731801
251519_at	GUN4; enzyme binding / tetrapyrrole binding	GUN4	AT3G59400	WT-µg-LD	WT-1g-LD	1437.91	396.421	1.85886	0.0252119
262163_at	60S ribosomal protein L30-2	AT1G77940	AT1G77940	WT-µg-LD	WT-1g-LD	5948	1640.12	1.85861	0.0080121
247406_at	ARR6 (RESPONSE REGULATOR 6); transcription regulator/ two-component response regulator	ARR6	AT5G62920	WT-µg-LD	WT-1g-LD	446.085	123.021	1.85841	0.00336456
256454_at	putative Isoflavone reductase	AT1G75280	AT1G75280	WT-µg-LD	WT-1g-LD	263.085	72.6045	1.8574	0.0225682
263119_at	tRNA modification protein 82	AT1G03110	AT1G03110	WT-µg-LD	WT-1g-LD	182.954	50.5173	1.85663	0.00644011
252576_s_at	HSP93-III; ATP binding / ATPase/ DNA binding / nuclease/ nucleoside-triphosphatase/ nucleotide binding / protein binding	HSP93-III	AT3G45450 /// AT3G48870	WT-µg-LD	WT-1g-LD	78.0195	21.5593	1.85553	0.00908947
266745_at	PKS1 (PHYTOCHROME KINASE SUBSTRATE 1); protein binding	PKS1	AT2G02950	WT-µg-LD	WT-1g-LD	228.766	63.2358	1.85506	0.00233201
253912_at	Met-10+ like family protein	AT4G27340	AT4G27340	WT-µg-LD	WT-1g-LD	247.198	68.371	1.85421	0.0125478
249466_at	60S ribosomal protein L5 (RPL5B)	RPL5B	AT5G39740	WT-µg-LD	WT-1g-LD	3926.78	1086.95	1.85307	0.0112169
247100_at	pentatricopeptide repeat-containing protein	AT5G66520	AT5G66520	WT-µg-LD	WT-1g-LD	75.8403	21.0027	1.85239	0.0405869
253688_at	methyltransferase	AT4G29590	AT4G29590	WT-µg-LD	WT-1g-LD	431.132	119.457	1.85164	0.00948308
259363_at	MAP1C (METHIONINE AMINOPEPTIDASE 1B); aminopeptidase/ metalloexopeptidase	MAP1C	AT1G13270	WT-µg-LD	WT-1g-LD	1348.54	373.875	1.85077	0.0455163
264600_at	chromosome transmission fidelity protein 18	CTF18	AT1G04730	WT-µg-LD	WT-1g-LD	68.7072	19.0508	1.85061	0.0320851
263442_at	photosystem II reaction center PsbP family protein	AT2G28605	AT2G28605	WT-µg-LD	WT-1g-LD	285.57	79.4854	1.84508	0.0197795
253209_at	pentatricopeptide repeat protein MRL1	MRL1	AT4G34830	WT-µg-LD	WT-1g-LD	183.181	50.991	1.84496	0.00831754
267138_s_at	ATPDX1.1 (pyridoxine biosynthesis 1.1); protein heterodimerization	PDX1.1	AT2G38210 /// AT2G38230	WT-µg-LD	WT-1g-LD	3855.06	1074.13	1.84358	0.0194675
254145_at	hypothetical protein	AT4G24700	AT4G24700	WT-µg-LD	WT-1g-LD	307.651	85.7213	1.84357	0.00218738
246521_at	N2,N2-dimethylguanosine tRNA methyltransferase	AT5G15810	AT5G15810	WT-µg-LD	WT-1g-LD	943.954	263.077	1.84323	0.032146
245165_at	hypothetical protein	AT2G33180	AT2G33180	WT-µg-LD	WT-1g-LD	794.147	221.335	1.84317	0.00263253
262235_at	50S ribosomal protein L18/L5e family protein	AT1G48350	AT1G48350	WT-µg-LD	WT-1g-LD	2506.61	699.806	1.84071	0.00139921
265464_at	protein ROP interactive partner 2	RIP3	AT2G37080	WT-µg-LD	WT-1g-LD	184.932	51.6399	1.84044	0.00438706
250403_at	putative argininosuccinate lyase	AT5G10920	AT5G10920	WT-µg-LD	WT-1g-LD	320.326	89.5383	1.83896	0.0466883
251524_at	isopropylmalate isomerase 1	IPMI1	AT3G58990	WT-µg-LD	WT-1g-LD	290.345	81.1622	1.83889	0.0257357
248537_at	putative thiol-disulfide oxidoreductase DCC	AT5G50100	AT5G50100	WT-µg-LD	WT-1g-LD	970.948	271.508	1.8384	0.0243931
265831_at	hypothetical protein	AT2G14460	AT2G14460	WT-µg-LD	WT-1g-LD	534.834	149.559	1.83838	0.0071241
249315_at	RNA-binding protein NOB1	AT5G41190	AT5G41190	WT-µg-LD	WT-1g-LD	1125.86	314.835	1.83836	0.000323033
260922_at	hypothetical protein	AT1G21560	AT1G21560	WT-µg-LD	WT-1g-LD	112.858	31.5921	1.83687	0.0339346
250461_at	hypothetical protein	AT5G10010	AT5G10010	WT-µg-LD	WT-1g-LD	559.638	156.816	1.83542	0.00541322
260615_at	malate dehydrogenase 1	mMDH1	AT1G53240	WT-µg-LD	WT-1g-LD	2932.84	821.882	1.83529	0.00654287
254617_s_at	RPL16B; structural constituent of ribosome	RPL16B	AT4G18730 /// AT5G45775	WT-µg-LD	WT-1g-LD	6589.05	1848.48	1.83373	0.00440087
264310_at	cysteine/histidine-rich C1 domain-containing protein	AT1G62030	AT1G62030	WT-µg-LD	WT-1g-LD	107.3	30.1031	1.83367	0.019091
263131_at	emb1473 (embryo defective 1473); structural constituent of ribosome	emb1473	AT1G78630	WT-µg-LD	WT-1g-LD	2748.81	772.352	1.83147	0.0104194
266656_at	ATCTH; transcription factor	ATCTH	AT2G25900	WT-µg-LD	WT-1g-LD	2739.25	769.765	1.83129	0.0248033
251518_at	hypothetical protein	AT3G59390	AT3G59390	WT-µg-LD	WT-1g-LD	183.44	51.5664	1.8308	0.018021
261669_at	hypothetical protein	AT1G18490	AT1G18490	WT-µg-LD	WT-1g-LD	297.226	83.6151	1.82972	0.0292675
260323_at	IMP4	IMP4	AT1G63780	WT-µg-LD	WT-1g-LD	776.4	218.501	1.82916	0.0511569
253252_at	ATASE2 (GLN PHOSPHORIBOSYL PYROPHOSPHATE AMIDOTRANSFERASE 2); amidophosphoribosyltransferase	ATASE2	AT4G34740	WT-µg-LD	WT-1g-LD	401.201	112.938	1.82879	0.051867
248238_at	Serine/threonine-protein kinase-like protein	AT5G53900	AT5G53900	WT-µg-LD	WT-1g-LD	393.889	110.909	1.82841	0.00828541
264087_at	emb1381 (embryo defective 1381)	emb1381	AT2G31340	WT-µg-LD	WT-1g-LD	92.678	26.1724	1.82418	0.025947
257188_at	pentatricopeptide repeat-containing protein	AT3G13150	AT3G13150	WT-µg-LD	WT-1g-LD	144.075	40.7337	1.82253	0.0147054
266778_at	CYP707A2; (+)-abscisic acid 8'-hydroxylase/ oxygen binding	CYP707A2	AT2G29090	WT-µg-LD	WT-1g-LD	297.781	84.1916	1.82251	0.000925358
250056_at	tRNA (guanine-N-7) methyltransferase	AT5G17660	AT5G17660	WT-µg-LD	WT-1g-LD	145.663	41.1883	1.82233	0.0119499
264098_at	hypothetical protein	AT1G79260	AT1G79260	WT-µg-LD	WT-1g-LD	627.216	177.496	1.82118	0.00825867
245879_at	ATTOC64-V (ARABIDOPSIS THALIANA TRANSLOCON AT THE OUTER MEMBRANE OF CHLOROPLASTS 64-V); amidase/ binding / carbon-nitrogen ligase, with glutamine as amido-N-donor	ATTOC64-V	AT5G09420	WT-µg-LD	WT-1g-LD	286.095	80.9906	1.82067	0.0280353
250256_at	putative TypA-like translation elongation factor SVR3	AT5G13650	AT5G13650	WT-µg-LD	WT-1g-LD	4089.46	1159.47	1.81844	0.00702231
263326_at	hypothetical protein	AT2G04280	AT2G04280	WT-µg-LD	WT-1g-LD	660.341	187.345	1.81751	0.0103606
252015_at	AtGRF4 (GROWTH-REGULATING FACTOR 4); transcription activator	AtGRF4	AT3G52910	WT-µg-LD	WT-1g-LD	248.729	70.5951	1.81694	0.00918307
252647_at	protein-tyrosine phosphatase	AT3G44620	AT3G44620	WT-µg-LD	WT-1g-LD	632.857	179.645	1.81673	0.00548848
267027_at	MATE efflux family protein	AT2G38330	AT2G38330	WT-µg-LD	WT-1g-LD	592.534	168.225	1.81651	0.0090263
266357_at	BAM6 (BETA-AMYLASE 6); beta-amylase/ catalytic/ cation binding	BAM6	AT2G32290	WT-µg-LD	WT-1g-LD	45.9739	13.0568	1.81601	0.0352116
261483_at	CAAX amino terminal protease family protein	AT1G14270	AT1G14270	WT-µg-LD	WT-1g-LD	728.559	206.915	1.81601	0.0128284
253228_at	hypothetical protein	AT4G34630	AT4G34630	WT-µg-LD	WT-1g-LD	3627.25	1030.17	1.816	0.00116777
255776_at	60S ribosomal protein L6-1	AT1G18540	AT1G18540	WT-µg-LD	WT-1g-LD	5198.01	1476.45	1.81583	0.00604584
264381_at	ribonuclease H2 subunit A	AT2G25100	AT2G25100	WT-µg-LD	WT-1g-LD	310.48	88.1922	1.81578	0.0356082
248287_at	thylakoid lumenal protein 2	AT5G52970	AT5G52970	WT-µg-LD	WT-1g-LD	219.552	62.3833	1.81533	0.0263235
258535_at	hydroxyproline-rich glycoprotein family protein	AT3G06750	AT3G06750	WT-µg-LD	WT-1g-LD	1007.51	286.438	1.8145	0.00541739
249867_at	IMS2 (2-ISOPROPYLMALATE SYNTHASE 2); 2-isopropylmalate synthase/ methylthioalkylmalate synthase	IMS2	AT5G23020	WT-µg-LD	WT-1g-LD	676.341	192.292	1.81445	0.0254533
248640_at	protein LOW PSII ACCUMULATION 66	LPA66	AT5G48910	WT-µg-LD	WT-1g-LD	239.27	68.1091	1.81272	0.00815126
250715_at	ATO (ATROPOS); nucleic acid binding / zinc ion binding	ATO	AT5G06160	WT-µg-LD	WT-1g-LD	224.719	64.1179	1.80932	0.00991078
247268_at	Non-specific lipid-transfer protein-like protein	AT5G64080	AT5G64080	WT-µg-LD	WT-1g-LD	199.67	56.979	1.80911	0.00290461
251920_at	uracil phosphoribosyltransferase	UPP	AT3G53900	WT-µg-LD	WT-1g-LD	227.781	65.067	1.80765	0.0249549
261077_at	protein phosphatase 2C 3	HAI2	AT1G07430	WT-µg-LD	WT-1g-LD	438.826	125.368	1.80748	0.00566817
259812_at	hypothetical protein	AT1G49840	AT1G49840	WT-µg-LD	WT-1g-LD	361.191	103.274	1.80629	0.0104382
262897_at	CCB4 (COFACTOR ASSEMBLY OF COMPLEX C)	CCB4	AT1G59840	WT-µg-LD	WT-1g-LD	212.643	60.8736	1.80454	0.0331837
264449_at	NPGR1 (NO POLLEN GERMINATION RELATED 1); calmodulin binding	NPGR1	AT1G27460	WT-µg-LD	WT-1g-LD	118.914	34.0821	1.80283	0.0308889
258023_at	ATCAD4; cinnamyl-alcohol dehydrogenase	ATCAD4	AT3G19450	WT-µg-LD	WT-1g-LD	1625.32	465.912	1.80259	0.00749093
264928_at	ATB2; oxidoreductase	ATB2	AT1G60710	WT-µg-LD	WT-1g-LD	793.123	227.642	1.80078	0.0302909
266471_at	elongation factor family protein	AT2G31060	AT2G31060	WT-µg-LD	WT-1g-LD	1003.39	288.341	1.79904	0.00653825
267262_at	SNG1 (SINAPOYLGLUCOSE 1); serine-type carboxypeptidase/ sinapoylglucose-malate O-sinapoyltransferase	SNG1	AT2G22990	WT-µg-LD	WT-1g-LD	3702.84	1064.34	1.79867	0.015364
261151_at	Sec14p-like phosphatidylinositol transfer family protein	AT1G19650	AT1G19650	WT-µg-LD	WT-1g-LD	312.811	89.9198	1.79858	0.0227684
253043_at	LBD39 (LOB DOMAIN-CONTAINING PROTEIN 39)	LBD39	AT4G37540	WT-µg-LD	WT-1g-LD	818.785	235.39	1.79843	0.0153599
257311_at	PHT2;1 (PHOSPHATE TRANSPORTER 2;1); low affinity phosphate transmembrane transporter	PHT2;1	AT3G26570	WT-µg-LD	WT-1g-LD	4057.89	1167.18	1.7977	0.0176228
248633_at	PRMT4A (PROTEIN ARGININE METHYLTRANSFERASE 4A); [myelin basic protein]-arginine N-methyltransferase/ histone-arginine N-methyltransferase/ methyltransferase/ protein heterodimerization/ protein homodimerization/ protein-arginine omega-N asymmetric methylt	PRMT4A	AT5G49020	WT-µg-LD	WT-1g-LD	255.803	73.6599	1.79608	0.0165944
264930_at	NIK3 (NSP-INTERACTING KINASE 3); kinase	NIK3	AT1G60800	WT-µg-LD	WT-1g-LD	259.732	74.8125	1.79567	0.0317331
255621_at	TRAF-like family protein	AT4G01390	AT4G01390	WT-µg-LD	WT-1g-LD	253.455	73.0377	1.79502	0.0274622
258104_at	ribosome production factor 2-like protein	AT3G23620	AT3G23620	WT-µg-LD	WT-1g-LD	1301.18	375.491	1.79297	0.00648518
264689_at	pentatricopeptide repeat-containing protein	AT1G09900	AT1G09900	WT-µg-LD	WT-1g-LD	271.037	78.2357	1.79259	0.027929
258106_at	RNR2A (RIBONUCLEOTIDE REDUCTASE 2A); ribonucleoside-diphosphate reductase	RNR2A	AT3G23580	WT-µg-LD	WT-1g-LD	1286.56	371.79	1.79096	0.0314762
261524_at	armadillo/beta-catenin-like repeats-containing protein	AT1G14300	AT1G14300	WT-µg-LD	WT-1g-LD	777.894	224.921	1.79015	0.0429314
265671_at	40S ribosomal protein S12-2	AT2G32060	AT2G32060	WT-µg-LD	WT-1g-LD	2451.78	710.005	1.78793	0.00854523
257809_at	TSO2 (TSO meaning 'ugly' in Chinese); oxidoreductase/ ribonucleoside-diphosphate reductase/ transition metal ion binding	TSO2	AT3G27060	WT-µg-LD	WT-1g-LD	701.736	203.285	1.78743	0.0168217
250898_at	ADK2 (ADENOSINE KINASE 2); adenosine kinase/ copper ion binding / kinase	ADK2	AT5G03300	WT-µg-LD	WT-1g-LD	1972.28	571.659	1.78664	0.0144199
246275_at	BEE2 (BR Enhanced Expression 2); DNA binding / transcription factor	BEE2	AT4G36540	WT-µg-LD	WT-1g-LD	261.916	75.9167	1.78662	0.01981
260876_at	bidirectional sugar transporter SWEET1	AT1G21460	AT1G21460	WT-µg-LD	WT-1g-LD	749.851	217.751	1.78392	0.00911457
265936_at	ATKEA4; potassium ion transmembrane transporter/ potassium:hydrogen antiporter	ATKEA4	AT2G19600	WT-µg-LD	WT-1g-LD	241.668	70.1963	1.78356	0.0112705
267066_at	uncharacterized methyltransferase	AT2G41040	AT2G41040	WT-µg-LD	WT-1g-LD	219.043	63.6662	1.78261	0.00531659
254250_at	cysteine-rich receptor-like protein kinase 21	CRK21	AT4G23290	WT-µg-LD	WT-1g-LD	476.079	138.407	1.78229	0.0298998
263763_at	hypothetical protein	AT2G21385	AT2G21385	WT-µg-LD	WT-1g-LD	514.463	149.606	1.7819	0.00410487
263375_s_at	ATPHB6 (PROHIBITIN 6)	ATPHB6	AT2G20530 /// AT4G28510	WT-µg-LD	WT-1g-LD	1986.39	577.899	1.78126	0.00602601
265339_at	AtPPa2 (Arabidopsis thaliana pyrophosphorylase 2); inorganic diphosphatase/ pyrophosphatase	AtPPa2	AT2G18230	WT-µg-LD	WT-1g-LD	579.878	168.712	1.78118	0.0157312
250293_s_at	auxin-responsive GH3 family protein /// auxin-responsive GH3 family protein	AT5G13360 /// AT5G13370	AT5G13360 /// AT5G13370	WT-µg-LD	WT-1g-LD	1083.82	315.415	1.78081	0.0509972
249785_at	SSI1 (SUPPRESSOR OF SALICYLIC ACID INSENSITIVITY 1); starch synthase/ transferase, transferring glycosyl groups	SSI1	AT5G24300	WT-µg-LD	WT-1g-LD	493.568	143.654	1.78065	0.0117164
248046_at	leucine-rich receptor-like protein kinase	AT5G56040	AT5G56040	WT-µg-LD	WT-1g-LD	190.036	55.4431	1.77719	0.00653647
259096_at	40S ribosomal protein S3a-1	AT3G04840	AT3G04840	WT-µg-LD	WT-1g-LD	5145.64	1501.31	1.77713	0.00842799
265570_at	hypothetical protein	AT2G28310	AT2G28310	WT-µg-LD	WT-1g-LD	362.743	105.87	1.77665	0.0082167
262061_at	ATPP2-B11 (ARABIDOPSIS THALIANA PHLOEM PROTEIN 2-B11); carbohydrate binding	ATPP2-B11	AT1G80110	WT-µg-LD	WT-1g-LD	804.603	235.144	1.77473	0.00751624
266567_at	eukaryotic translation initiation factor isoform 4G-2	eIFiso4G2	AT2G24050	WT-µg-LD	WT-1g-LD	322.345	94.2893	1.77344	0.022697
261614_at	PAB8 (POLY(A) BINDING PROTEIN 8); RNA binding / translation initiation factor	PAB8	AT1G49760	WT-µg-LD	WT-1g-LD	1629.26	476.955	1.77229	0.00765083
249859_at	protein kinase family protein	AT5G22840	AT5G22840	WT-µg-LD	WT-1g-LD	450.216	131.81	1.77216	0.0424102
265103_at	N-acetylglucosamine-1-phosphate uridylyltransferase 1	GlcNA.1UT1	AT1G31070	WT-µg-LD	WT-1g-LD	129.537	37.9454	1.77137	0.0102397
257225_s_at	RPL12-C (ribosomal protein l12-c); structural constituent of ribosome	RPL12-C	AT3G27830 /// AT3G27850	WT-µg-LD	WT-1g-LD	7162.98	2098.75	1.77103	0.0292402
258396_at	ribosomal RNA processing brix domain-containing protein	AT3G15460	AT3G15460	WT-µg-LD	WT-1g-LD	361.323	105.889	1.77073	0.0454196
266928_at	PMM (PHOSPHOMANNOMUTASE); phosphomannomutase	PMM	AT2G45790	WT-µg-LD	WT-1g-LD	5869.94	1720.82	1.77025	0.0219287
245852_at	ribosomal protein L10	AT5G13510	AT5G13510	WT-µg-LD	WT-1g-LD	2277.37	667.974	1.76951	0.0241425
264864_at	hypothetical protein	AT1G24310	AT1G24310	WT-µg-LD	WT-1g-LD	184.613	54.1498	1.76948	0.0124827
260781_at	DECOY (DECOY)	DECOY	AT1G14620	WT-µg-LD	WT-1g-LD	515.177	151.11	1.76947	0.0029846
251241_s_at	putative endonuclease or glycosyl hydrolase /// E-Z type HEAT repeat-containing protein	AT3G62460 /// AT3G62530	AT3G62460 /// AT3G62530	WT-µg-LD	WT-1g-LD	2769.76	812.426	1.76945	0.0113645
254535_at	bifunctional aspartate kinase/homoserine dehydrogenase, putative / AK-HSDH, putative	AK-HSDH II	AT4G19710	WT-µg-LD	WT-1g-LD	865.224	253.926	1.76867	0.0136381
263915_at	hypothetical protein	AT2G36430	AT2G36430	WT-µg-LD	WT-1g-LD	390.365	114.681	1.7672	0.0102697
246527_at	alpha-L RNA-binding motif/ribosomal protein S4 family protein	AT5G15750	AT5G15750	WT-µg-LD	WT-1g-LD	1744.56	512.596	1.76697	0.0288706
263130_at	POLD3; DNA-directed DNA polymerase	POLD3	AT1G78650	WT-µg-LD	WT-1g-LD	129.12	37.9688	1.76582	0.0146372
246307_at	ATG2; aminopeptidase/ metalloexopeptidase	ATG2	AT3G51800	WT-µg-LD	WT-1g-LD	3267.76	961.217	1.76537	0.00939057
253911_at	G-type lectin S-receptor-like serine/threonine-protein kinase SD1-1	AT4G27300	AT4G27300	WT-µg-LD	WT-1g-LD	3326	978.455	1.76521	0.0138957
255638_at	type II membrane pectin methyltransferase	AT4G00740	AT4G00740	WT-µg-LD	WT-1g-LD	684.201	201.551	1.76327	0.00622582
250272_at	ATGSL12 (glucan synthase-like 12); 1,3-beta-glucan synthase/ transferase, transferring glycosyl groups	ATGSL12	AT5G13000	WT-µg-LD	WT-1g-LD	697.784	205.79	1.76161	0.00716789
262946_at	hypothetical protein	AT1G79390	AT1G79390	WT-µg-LD	WT-1g-LD	520.136	153.514	1.76052	0.0101525
246107_at	---	---	AT5G28700	WT-µg-LD	WT-1g-LD	57.2906	16.9202	1.75955	0.0291868
264489_at	squamosa promoter-binding-like protein 10	SPL10	AT1G27370	WT-µg-LD	WT-1g-LD	211.221	62.3984	1.75917	0.0426992
247936_at	LUT2 (LUTEIN DEFICIENT 2); lycopene epsilon cyclase	LUT2	AT5G57030	WT-µg-LD	WT-1g-LD	786.814	232.443	1.75914	0.0363393
258286_at	ATP binding microtubule motor family protein	AT3G16060	AT3G16060	WT-µg-LD	WT-1g-LD	562.248	166.164	1.7586	0.0064153
249528_at	hypothetical protein	AT5G38720	AT5G38720	WT-µg-LD	WT-1g-LD	255.269	75.5299	1.7569	0.0160947
260388_at	cyclophilin-like peptidyl-prolyl cis-trans isomerase family protein	AT1G74070	AT1G74070	WT-µg-LD	WT-1g-LD	88.3117	26.1326	1.75675	0.0206343
256215_at	protein GRANA DEFICIENT CHLOROPLAST 1	AT1G50900	AT1G50900	WT-µg-LD	WT-1g-LD	1442.46	426.874	1.75665	0.0201604
262075_at	ZCF61; protein binding / zinc ion binding	ZCF61	AT1G59560	WT-µg-LD	WT-1g-LD	153.586	45.4872	1.75551	0.00554048
254501_at	PTAC14 (PLASTID TRANSCRIPTIONALLY ACTIVE14)	PTAC14	AT4G20130	WT-µg-LD	WT-1g-LD	131.73	39.0325	1.75484	0.0111653
261401_at	putative serine/threonine protein kinase	AT1G79640	AT1G79640	WT-µg-LD	WT-1g-LD	109.269	32.3895	1.75429	0.0297439
261190_at	PRPL11 (PLASTID RIBOSOMAL PROTEIN L11); structural constituent of ribosome	PRPL11	AT1G32990	WT-µg-LD	WT-1g-LD	1250.64	370.727	1.75424	0.00361706
246265_at	AT-IE; phosphoribosyl-AMP cyclohydrolase/ phosphoribosyl-ATP diphosphatase	AT-IE	AT1G31860	WT-µg-LD	WT-1g-LD	473.444	140.489	1.75274	0.00392059
246249_at	pentatricopeptide repeat-containing protein	AT4G36680	AT4G36680	WT-µg-LD	WT-1g-LD	252.276	74.8917	1.75212	0.0171312
258708_at	FAD/NAD(P)-binding oxidoreductase family protein	AT3G09580	AT3G09580	WT-µg-LD	WT-1g-LD	389.513	115.683	1.75149	0.0100276
266241_s_at	pentatricopeptide repeat-containing protein /// pentatricopeptide (PPR) repeat-containing protein	AT2G27800 /// AT5G27300	AT2G27800 /// AT5G27300	WT-µg-LD	WT-1g-LD	110.446	32.8043	1.75138	0.0253183
248505_at	hypothetical protein	AT5G50360	AT5G50360	WT-µg-LD	WT-1g-LD	176.897	52.6012	1.74974	0.0508252
247607_at	pentatricopeptide repeat-containing protein	AT5G60960	AT5G60960	WT-µg-LD	WT-1g-LD	414.279	123.217	1.7494	0.00667725
248467_at	bidirectional sugar transporter SWEET13	AT5G50800	AT5G50800	WT-µg-LD	WT-1g-LD	111.252	33.0896	1.74939	0.033805
250832_at	NAS1 (NICOTIANAMINE SYNTHASE 1); nicotianamine synthase	NAS1	AT5G04950	WT-µg-LD	WT-1g-LD	75.0426	22.3214	1.74929	0.0278138
245494_at	pentatricopeptide repeat-containing protein SVR7	AT4G16390	AT4G16390	WT-µg-LD	WT-1g-LD	940.066	279.638	1.7492	0.0394477
250901_at	RABC2A (RAB GTPASE HOMOLOG C2A); GTP binding / GTP-dependent protein binding / myosin XI tail binding	RABC2A	AT5G03530	WT-µg-LD	WT-1g-LD	142.183	42.2968	1.74912	0.00767413
254166_at	SHD (SHEPHERD); ATP binding / unfolded protein binding	SHD	AT4G24190	WT-µg-LD	WT-1g-LD	13887.6	4133.9	1.74822	0.0457464
256140_at	DEA(D/H)-box RNA helicase family protein	AT1G48650	AT1G48650	WT-µg-LD	WT-1g-LD	653.696	194.608	1.74805	0.0215293
248847_at	TIR-NBS-LRR class disease resistance protein	AT5G46510	AT5G46510	WT-µg-LD	WT-1g-LD	82.45	24.5502	1.74779	0.0131872
257906_at	ATL5 (A. THALIANA RIBOSOMAL PROTEIN L5); 5S rRNA binding / structural constituent of ribosome	ATL5	AT3G25520	WT-µg-LD	WT-1g-LD	4744.93	1413.25	1.74737	0.0102167
252252_at	RID3 (ROOT INITIATION DEFECTIVE 3); nucleotide binding	RID3	AT3G49180	WT-µg-LD	WT-1g-LD	360.677	107.468	1.7468	0.0321027
247518_at	pentatricopeptide repeat-containing protein	AT5G61800	AT5G61800	WT-µg-LD	WT-1g-LD	105.268	31.3695	1.74663	0.0184084
262598_at	hypothetical protein	AT1G15260	AT1G15260	WT-µg-LD	WT-1g-LD	183.751	54.7701	1.74629	0.0150821
254737_at	HXXXD-type acyl-transferase-like protein	AT4G13840	AT4G13840	WT-µg-LD	WT-1g-LD	221.649	66.1126	1.74528	0.0176506
251657_at	nucleolar essential protein-related protein	AT3G57000	AT3G57000	WT-µg-LD	WT-1g-LD	729.778	217.74	1.74485	0.0406908
248449_at	transcriptional coactivator/pterin dehydratase	AT5G51110	AT5G51110	WT-µg-LD	WT-1g-LD	4277.39	1276.75	1.74425	0.00827139
256341_at	deoxyribonucleoside kinase	AT1G72040	AT1G72040	WT-µg-LD	WT-1g-LD	516.154	154.149	1.74348	0.00180888
249421_at	DEG8; peptidase/ serine-type peptidase	DEG8	AT5G39830	WT-µg-LD	WT-1g-LD	506.411	151.576	1.74027	0.037426
261905_at	DNA mismatch repair protein MutS2	AT1G65070	AT1G65070	WT-µg-LD	WT-1g-LD	219.697	65.7735	1.73994	0.0115829
259075_at	putative N(2),N(2)-dimethylguanosine tRNA methyltransferase 2	AT3G02320	AT3G02320	WT-µg-LD	WT-1g-LD	430.076	128.767	1.73983	0.00150931
263372_at	60S ribosomal protein L14-1	AT2G20450	AT2G20450	WT-µg-LD	WT-1g-LD	970.637	290.767	1.73907	0.00519186
263452_at	probable trehalose-phosphate phosphatase E	AT2G22190	AT2G22190	WT-µg-LD	WT-1g-LD	227.359	68.1242	1.73874	0.00955484
264799_at	NPQ1 (NON-PHOTOCHEMICAL QUENCHING 1); violaxanthin de-epoxidase	NPQ1	AT1G08550	WT-µg-LD	WT-1g-LD	756.495	226.694	1.73858	0.0479195
251183_at	hypothetical protein	AT3G62630	AT3G62630	WT-µg-LD	WT-1g-LD	221.89	66.5213	1.73795	0.0221262
253891_at	major facilitator protein	AT4G27720	AT4G27720	WT-µg-LD	WT-1g-LD	901.68	270.333	1.73788	0.0192177
263943_at	S-adenosyl methionine transporter-like protein	AT2G35800	AT2G35800	WT-µg-LD	WT-1g-LD	1125.8	337.795	1.73673	0.0277589
255481_at	PMS1 (POSTMEIOTIC SEGREGATION 1); ATP binding / mismatched DNA binding	PMS1	AT4G02460	WT-µg-LD	WT-1g-LD	96.9744	29.1051	1.73633	0.0136824
246849_at	hypothetical protein	AT5G26850	AT5G26850	WT-µg-LD	WT-1g-LD	147.317	44.2186	1.7362	0.00369053
250879_at	putative methyltransferase PMT7	AT5G04060	AT5G04060	WT-µg-LD	WT-1g-LD	166.741	50.0561	1.73599	0.031054
247385_at	emb2746 (embryo defective 2746); DNA binding / catalytic/ hydrolase	emb2746	AT5G63420	WT-µg-LD	WT-1g-LD	174.584	52.4312	1.73543	0.000400353
250058_at	PSRP6 (PLASTID-SPECIFIC 50S RIBOSOMAL PROTEIN 6)	PSRP6	AT5G17870	WT-µg-LD	WT-1g-LD	4077.13	1224.54	1.73532	0.0277334
246126_at	ATNUDX19 (ARABIDOPSIS THALIANA NUDIX HYDROLASE HOMOLOG 19); hydrolase/ metal ion binding	ATNUDX19	AT5G20070	WT-µg-LD	WT-1g-LD	1304.3	392.016	1.73429	0.0178754
266575_at	translation initiation factor IF-3	AT2G24060	AT2G24060	WT-µg-LD	WT-1g-LD	739.001	222.139	1.73412	0.0233023
258512_at	SFR2 (SENSITIVE TO FREEZING 2); beta-glucosidase/ hydrolase, hydrolyzing O-glycosyl compounds	SFR2	AT3G06510	WT-µg-LD	WT-1g-LD	2654.64	797.987	1.73408	0.0104562
263805_at	hypothetical protein	AT2G40400	AT2G40400	WT-µg-LD	WT-1g-LD	1067.42	320.987	1.73355	0.0479268
261088_at	pentatricopeptide repeat-containing protein	AT1G07590	AT1G07590	WT-µg-LD	WT-1g-LD	1319.46	396.879	1.73318	0.00272841
258375_at	Ca2+-activated RelA/spot-like protein	CRSH	AT3G17470	WT-µg-LD	WT-1g-LD	321.183	96.6403	1.7327	0.00783306
247439_at	AHA11 (Arabidopsis H(+)-ATPase 11); ATPase	AHA11	AT5G62670	WT-µg-LD	WT-1g-LD	391.016	117.738	1.73165	0.0229516
262502_at	PTAC6 (PLASTID TRANSCRIPTIONALLY ACTIVE6)	PTAC6	AT1G21600	WT-µg-LD	WT-1g-LD	852.601	256.726	1.73164	0.0503405
260236_at	geranylgeranyl diphosphate reductase	AT1G74470	AT1G74470	WT-µg-LD	WT-1g-LD	6512.93	1961.19	1.73158	0.0142581
246317_at	transducin/WD40 repeat-like superfamily protein	AT3G56900	AT3G56900	WT-µg-LD	WT-1g-LD	178.277	53.7331	1.73024	0.0339635
246559_at	WD-40 repeat family protein	AT5G15550	AT5G15550	WT-µg-LD	WT-1g-LD	769.244	231.861	1.73018	0.000313703
258365_s_at	diaminopimelate decarboxylase 1 /// diaminopimelate decarboxylase 2	AT3G14390 /// AT5G11880	AT3G14390 /// AT5G11880	WT-µg-LD	WT-1g-LD	1093.57	329.649	1.73004	0.00896427
265377_at	O-glycosyl hydrolases family 17 protein	AT2G05790	AT2G05790	WT-µg-LD	WT-1g-LD	313.925	94.667	1.72949	0.014058
263020_at	NHL domain-containing protein	AT1G23880	AT1G23880	WT-µg-LD	WT-1g-LD	111.32	33.5721	1.72938	0.00441747
253749_at	PAP2 (PHYTOCHROME-ASSOCIATED PROTEIN 2); transcription factor	PAP2	AT4G29080	WT-µg-LD	WT-1g-LD	238.847	72.0519	1.72898	0.046589
259629_at	WRR4 (WHITE RUST RESISTANCE 4); ATP binding / nucleoside-triphosphatase/ nucleotide binding / transmembrane receptor	WRR4	AT1G56510	WT-µg-LD	WT-1g-LD	1514.07	456.794	1.72882	0.0125988
262809_at	ATSS3 (starch synthase 3); starch synthase/ transferase, transferring glycosyl groups	ATSS3	AT1G11720	WT-µg-LD	WT-1g-LD	173.743	52.464	1.72756	0.0192336
259023_at	hypothetical protein	AT3G07510	AT3G07510	WT-µg-LD	WT-1g-LD	346.003	104.53	1.72687	0.00155566
255236_at	ATEHD2 (EPS15 HOMOLOGY DOMAIN 2); GTP binding / GTPase/ calcium ion binding	ATEHD2	AT4G05520	WT-µg-LD	WT-1g-LD	76.577	23.1439	1.72628	0.0357855
265374_at	PSBX (photosystem II subunit X)	PSBX	AT2G06520	WT-µg-LD	WT-1g-LD	10964.7	3315.9	1.7254	0.016125
256628_at	TOM40; P-P-bond-hydrolysis-driven protein transmembrane transporter/ voltage-gated anion channel	TOM40	AT3G20000	WT-µg-LD	WT-1g-LD	1303.37	394.431	1.7244	0.00677588
244968_at	ribosomal protein L33	rpl33	ATCG00640	WT-µg-LD	WT-1g-LD	5880.18	1782.03	1.72234	0.0515805
248303_at	FTSH11 (FtsH protease 11); ATP-dependent peptidase/ ATPase/ metallopeptidase	FTSH11	AT5G53170	WT-µg-LD	WT-1g-LD	778.887	236.095	1.72205	0.00425567
259727_at	FED A; 2 iron, 2 sulfur cluster binding / electron carrier/ iron-sulfur cluster binding	FED A	AT1G60950	WT-µg-LD	WT-1g-LD	14474.6	4388.08	1.72186	0.0403395
246576_at	ROPGEF14; Rho guanyl-nucleotide exchange factor	ROPGEF14	AT1G31650	WT-µg-LD	WT-1g-LD	505.099	153.167	1.72146	0.00230216
262084_at	hypothetical protein	AT1G56080	AT1G56080	WT-µg-LD	WT-1g-LD	78.8537	23.9121	1.72144	0.0147894
246517_at	30S ribosomal protein 3-2	AT5G15760	AT5G15760	WT-µg-LD	WT-1g-LD	129.832	39.3935	1.72062	0.0277339
251929_at	SIGC (RNA POLYMERASE SIGMA-SUBUNIT C); DNA binding / DNA-directed RNA polymerase/ sigma factor/ transcription factor	SIGC	AT3G53920	WT-µg-LD	WT-1g-LD	642.417	194.963	1.72031	0.0068005
267578_at	hypothetical protein	AT2G30695	AT2G30695	WT-µg-LD	WT-1g-LD	211.763	64.4404	1.71641	0.0102497
259277_at	AtSS2 (starch synthase 2); transferase, transferring glycosyl groups	AtSS2	AT3G01180	WT-µg-LD	WT-1g-LD	326.34	99.3078	1.7164	0.0115309
259539_at	O-fucosyltransferase-like protein	AT1G20550	AT1G20550	WT-µg-LD	WT-1g-LD	73.8351	22.4725	1.71615	0.0200859
253627_at	putative low temperature and salt responsive protein	AT4G30650	AT4G30650	WT-µg-LD	WT-1g-LD	683.641	208.094	1.716	0.0245059
254460_at	ATRP1 (PPDK REGULATORY PROTEIN); phosphoprotein phosphatase/ protein kinase	ATRP1	AT4G21210	WT-µg-LD	WT-1g-LD	2131.35	648.851	1.71581	0.00755506
253253_at	SAUR-like auxin-responsive family protein	AT4G34750	AT4G34750	WT-µg-LD	WT-1g-LD	500.829	152.491	1.7156	0.0426296
246418_at	zinc-binding dehydrogenase family protein	AT5G16960	AT5G16960	WT-µg-LD	WT-1g-LD	222.594	67.8142	1.71475	0.0113272
261725_at	SmD3 (snRNP core protein SmD3)	SmD3	AT1G76300	WT-µg-LD	WT-1g-LD	738.57	225.037	1.71457	0.029243
265338_at	ribosomal protein L6	AT2G18400	AT2G18400	WT-µg-LD	WT-1g-LD	264.344	80.5522	1.71442	0.018381
251916_at	probable peptide/nitrate transporter	AT3G53960	AT3G53960	WT-µg-LD	WT-1g-LD	2060.64	628.018	1.71421	9.40186e-05
263606_at	KCS9 (3-KETOACYL-COA SYNTHASE 9); acyltransferase/ catalytic/ transferase, transferring acyl groups other than amino-acyl groups	KCS9	AT2G16280	WT-µg-LD	WT-1g-LD	1154.04	351.845	1.71369	0.00994294
267017_at	SVR1 (SUPPRESSOR OF VARIEGATION 1); RNA binding / pseudouridine synthase	SVR1	AT2G39140	WT-µg-LD	WT-1g-LD	175.693	53.5815	1.71325	0.0312107
267305_at	ATKT1 (POTASSIUM TRANSPORTER 1); potassium ion transmembrane transporter	ATKT1	AT2G30070	WT-µg-LD	WT-1g-LD	266.029	81.1371	1.71315	0.00874488
258900_at	RPL18 (RIBOSOMAL PROTEIN L18); structural constituent of ribosome	RPL18	AT3G05590	WT-µg-LD	WT-1g-LD	5956.59	1817.17	1.7128	0.00630845
251951_s_at	hypothetical protein /// hypothetical protein /// hypothetical protein	AT1G55710 /// AT3G53630 /// AT4G18692	AT1G55710 /// AT3G53630 /// AT4G18692	WT-µg-LD	WT-1g-LD	686.076	209.361	1.71237	0.00176949
258329_at	ATPDIL1-6 (PDI-LIKE 1-6); protein disulfide isomerase	ATPDIL1-6	AT3G16110	WT-µg-LD	WT-1g-LD	652.221	199.112	1.71178	0.042375
257949_at	UGT71B1 (UDP-GLUCOSYL TRANSFERASE 71B1); UDP-glycosyltransferase/ quercetin 3-O-glucosyltransferase/ transferase, transferring glycosyl groups	UGT71B1	AT3G21750	WT-µg-LD	WT-1g-LD	406.336	124.054	1.71171	0.0189178
265121_at	FMO GS-OX3 (FLAVIN-MONOOXYGENASE GLUCOSINOLATE S-OXYGENASE 3); 3-methylthiopropyl glucosinolate S-oxygenase/ 4-methylthiopropyl glucosinolate S-oxygenase/ 5-methylthiopropyl glucosinolate S-oxygenase/ 6-methylthiopropyl glucosinolate S-oxygenase/ 7-methyl	FMO GS-OX3	AT1G62560	WT-µg-LD	WT-1g-LD	121.421	37.089	1.71095	0.0295196
254665_at	glycosyl hydrolase family protein	AT4G18340	AT4G18340	WT-µg-LD	WT-1g-LD	207.25	63.3396	1.71019	0.027045
249347_at	S-adenosyl-L-methionine-dependent methyltransferases superfamily protein	AT5G40830	AT5G40830	WT-µg-LD	WT-1g-LD	224.266	68.5947	1.70904	0.00403639
249828_at	Succinyl-CoA ligase [GDP-forming] subunit alpha-2	AT5G23250	AT5G23250	WT-µg-LD	WT-1g-LD	589.322	180.27	1.7089	0.00689474
248062_at	bifunctional inhibitor/lipid-transfer protein/seed storage 2S albumin-like protein	AT5G55450	AT5G55450	WT-µg-LD	WT-1g-LD	1723.14	527.615	1.70748	0.0164442
254684_at	GR-RBP2 (GLYCINE-RICH RNA-BINDING PROTEIN 2); ATP binding / RNA binding / double-stranded DNA binding / single-stranded DNA binding	GR-RBP2	AT4G13850	WT-µg-LD	WT-1g-LD	4050.8	1240.65	1.70711	0.00888744
245183_at	CCCH-type zinc finger family protein with RNA-binding domain	AT5G12440	AT5G12440	WT-µg-LD	WT-1g-LD	113.646	34.8295	1.70616	0.0227314
265668_at	Acyl-CoA N-acyltransferases (NAT) superfamily protein	AT2G32020	AT2G32020	WT-µg-LD	WT-1g-LD	212.238	65.054	1.70597	0.0294862
250111_at	acetolactate synthase small subunit 1	VAT1	AT5G16290	WT-µg-LD	WT-1g-LD	591.242	181.336	1.70508	0.00490764
267132_at	NAPRT2 (NICOTINATE PHOSPHORIBOSYLTRANSFERASE 2); nicotinate phosphoribosyltransferase	NAPRT2	AT2G23420	WT-µg-LD	WT-1g-LD	2065.09	633.659	1.70443	0.0174702
250222_at	transducin/WD40 repeat-like superfamily protein	AT5G14050	AT5G14050	WT-µg-LD	WT-1g-LD	740.033	227.211	1.70356	0.0007124
258437_at	putative protein phosphatase 2C 40	AT3G16560	AT3G16560	WT-µg-LD	WT-1g-LD	621.138	190.797	1.70288	0.0149249
248436_at	ubiquinol-cytochrome C chaperone family protein	AT5G51220	AT5G51220	WT-µg-LD	WT-1g-LD	574.051	176.358	1.70267	0.0200856
266210_at	PGY1 (PIGGYBACK1); RNA binding / structural constituent of ribosome	PGY1	AT2G27530	WT-µg-LD	WT-1g-LD	6497.56	1997.08	1.70201	0.041322
256230_at	FKBP-like peptidyl-prolyl cis-trans isomerase family protein	AT3G12340	AT3G12340	WT-µg-LD	WT-1g-LD	175.681	54.0651	1.70019	0.0231025
253490_at	Probable diphthine synthase	AT4G31790	AT4G31790	WT-µg-LD	WT-1g-LD	638.965	197.272	1.69555	0.0106774
255572_at	thylakoid rhodanese-like protein	TROL	AT4G01050	WT-µg-LD	WT-1g-LD	1568.8	484.417	1.69534	0.0461769
249948_at	DEAD-box ATP-dependent RNA helicase 58	AT5G19210	AT5G19210	WT-µg-LD	WT-1g-LD	107.534	33.2407	1.69377	0.0204755
264696_at	trichome birefringence-like 27 protein	TBL27	AT1G70230	WT-µg-LD	WT-1g-LD	416.632	128.878	1.69276	0.0125719
258074_at	ethylene-responsive transcription factor ERF119	AT3G25890	AT3G25890	WT-µg-LD	WT-1g-LD	890.278	275.4	1.69273	0.00512058
265388_s_at	SYTA (SYNAPTOTAGMIN A)	SYTA	AT2G20990 /// AT2G21010	WT-µg-LD	WT-1g-LD	1704.14	527.479	1.69186	0.02651
255559_at	protein kinase family protein	AT4G02010	AT4G02010	WT-µg-LD	WT-1g-LD	401.146	124.199	1.69147	0.013147
247340_at	zinc ion binding / DNA binding protein	AT5G63700	AT5G63700	WT-µg-LD	WT-1g-LD	177.092	54.8344	1.69135	0.00967356
246070_at	ribosomal protein L7Ae/L30e/S12e/Gadd45 family protein	AT5G20160	AT5G20160	WT-µg-LD	WT-1g-LD	3987.59	1235.67	1.69023	0.00205099
253039_at	SQE3 (squalene epoxidase 3); squalene monooxygenase	SQE3	AT4G37760	WT-µg-LD	WT-1g-LD	1575.71	488.298	1.69017	0.000656865
266963_at	MTP11; cation transmembrane transporter/ manganese ion transmembrane transporter/ manganese:hydrogen antiporter	MTP11	AT2G39450	WT-µg-LD	WT-1g-LD	1649.59	511.545	1.68917	0.00195194
255850_at	50S ribosomal protein L28	AT2G33450	AT2G33450	WT-µg-LD	WT-1g-LD	2649.63	821.723	1.68907	0.0117092
265798_at	hypothetical protein	AT2G35790	AT2G35790	WT-µg-LD	WT-1g-LD	722.336	224.045	1.68888	0.0224094
266636_at	GDCH; glycine dehydrogenase (decarboxylating)	GDCH	AT2G35370	WT-µg-LD	WT-1g-LD	5320.74	1652	1.68741	0.0034285
262963_at	dihydrolipoyllysine-residue acetyltransferase component 3 of pyruvate dehydrogenase complex	AT1G54220	AT1G54220	WT-µg-LD	WT-1g-LD	351.408	109.202	1.68614	0.0124472
249519_at	APE1 (ACCLIMATION OF PHOTOSYNTHESIS TO ENVIRONMENT)	APE1	AT5G38660	WT-µg-LD	WT-1g-LD	2425.99	754.392	1.68519	0.0387611
247249_at	ribosomal protein L18e/L15	AT5G64670	AT5G64670	WT-µg-LD	WT-1g-LD	240.508	74.8048	1.68488	0.0312617
262496_at	TRAM, LAG1 and CLN8 (TLC) lipid-sensing domain containing protein	AT1G21790	AT1G21790	WT-µg-LD	WT-1g-LD	855.081	265.967	1.68481	0.00149758
264452_at	GRP23 (GLUTAMINE-RICH PROTEIN23); binding	GRP23	AT1G10270	WT-µg-LD	WT-1g-LD	177.271	55.1447	1.68466	0.00256191
256304_at	S-adenosylmethionine-dependent methyltransferase domain-containing protein	AT1G69523	AT1G69523	WT-µg-LD	WT-1g-LD	91.1499	28.3588	1.68445	0.0408724
266093_at	ribosome biogenesis regulatory protein-like protein	AT2G37990	AT2G37990	WT-µg-LD	WT-1g-LD	823.605	256.244	1.68443	0.00935757
267274_at	mitochondrial substrate carrier family protein	AT2G30160	AT2G30160	WT-µg-LD	WT-1g-LD	656.753	204.352	1.68429	0.0145837
260790_at	hypothetical protein	AT1G06240	AT1G06240	WT-µg-LD	WT-1g-LD	191.282	59.5259	1.68411	0.0101296
247555_at	ECT3	ECT3	AT5G61020	WT-µg-LD	WT-1g-LD	4026.63	1253.8	1.68327	0.0527909
266079_at	LCD1 (LOWER CELL DENSITY 1)	LCD1	AT2G37860	WT-µg-LD	WT-1g-LD	418.437	130.389	1.68219	0.00168929
262238_at	hypothetical protein	AT1G48300	AT1G48300	WT-µg-LD	WT-1g-LD	8537.75	2661.83	1.68144	0.00510511
267213_at	60S ribosomal protein L7-3	AT2G44120	AT2G44120	WT-µg-LD	WT-1g-LD	7333.84	2286.53	1.68141	0.0037738
245063_at	mitochondrial glycoprotein family protein	AT2G39795	AT2G39795	WT-µg-LD	WT-1g-LD	482.162	150.344	1.68125	0.00550088
249677_at	P-loop containing nucleoside triphosphate hydrolases superfamily protein	AT5G35970	AT5G35970	WT-µg-LD	WT-1g-LD	1530.03	477.399	1.6803	0.0166397
257063_s_at	ribosomal protein S24/S35 /// ribosomal protein S24/S35	AT3G18240 /// AT4G21460	AT3G18240 /// AT4G21460	WT-µg-LD	WT-1g-LD	219.154	68.4282	1.67928	0.0201841
251807_at	OVA1 (OVULE ABORTION 1); ATP binding / aminoacyl-tRNA ligase/ methionine-tRNA ligase/ nucleotide binding	OVA1	AT3G55400	WT-µg-LD	WT-1g-LD	651.03	203.333	1.67888	0.0112034
260523_at	EMB2654 (EMBRYO DEFECTIVE 2654)	EMB2654	AT2G41720	WT-µg-LD	WT-1g-LD	404.825	126.484	1.67835	0.00334936
247161_at	protein COTTON GOLGI-RELATED 3	AT5G65810	AT5G65810	WT-µg-LD	WT-1g-LD	502.12	156.942	1.6778	0.00810548
267526_at	PSBW (PHOTOSYSTEM II REACTION CENTER W)	PSBW	AT2G30570	WT-µg-LD	WT-1g-LD	7819.06	2444.01	1.67775	0.0129589
251376_at	protein LOST MERISTEM 2	HAM2	AT3G60630	WT-µg-LD	WT-1g-LD	468.274	146.457	1.67688	0.0271594
266990_at	ATATH8; transporter	ATATH8	AT2G39190	WT-µg-LD	WT-1g-LD	267.797	83.8061	1.67601	0.0247023
262754_at	inosine-5'-monophosphate dehydrogenase 2	AT1G16350	AT1G16350	WT-µg-LD	WT-1g-LD	582.922	182.51	1.67533	0.0484395
261014_at	pentatricopeptide repeat-containing protein	AT1G26460	AT1G26460	WT-µg-LD	WT-1g-LD	466.395	146.067	1.67493	0.00680338
258333_at	MFP1 (MAR BINDING FILAMENT-LIKE PROTEIN 1); DNA binding	MFP1	AT3G16000	WT-µg-LD	WT-1g-LD	563.021	176.486	1.67364	0.0539299
248362_at	FIB1 (FIBRILLARIN 1); snoRNA binding	FIB1	AT5G52470	WT-µg-LD	WT-1g-LD	7185.18	2252.84	1.67328	0.00644499
250753_at	UGT76C2; UDP-glycosyltransferase/ cis-zeatin O-beta-D-glucosyltransferase/ cytokinin 7-beta-glucosyltransferase/ cytokinin 9-beta-glucosyltransferase/ trans-zeatin O-beta-D-glucosyltransferase/ transferase, transferring glycosyl groups	UGT76C2	AT5G05860	WT-µg-LD	WT-1g-LD	675.955	211.98	1.673	0.0144549
266402_at	hypothetical protein	AT2G38780	AT2G38780	WT-µg-LD	WT-1g-LD	224.463	70.4473	1.67186	0.0309778
256862_at	dehydratase family protein	AT3G23940	AT3G23940	WT-µg-LD	WT-1g-LD	603.241	189.331	1.67183	0.00423468
257190_at	30S ribosomal protein S10	AT3G13120	AT3G13120	WT-µg-LD	WT-1g-LD	2287.54	718.893	1.66995	0.038334
256792_at	pentatricopeptide repeat-containing protein	AT3G22150	AT3G22150	WT-µg-LD	WT-1g-LD	106	33.3273	1.66929	0.0192149
266695_at	oxidation-related zinc Finger 1	AT2G19810	AT2G19810	WT-µg-LD	WT-1g-LD	2767.49	870.817	1.66814	0.0149134
267061_at	serine protease	ARASP	AT2G32480	WT-µg-LD	WT-1g-LD	1615.59	508.384	1.66807	0.00470446
257021_at	BCAT4 (BRANCHED-CHAIN AMINOTRANSFERASE4); catalytic/ methionine-oxo-acid transaminase	BCAT4	AT3G19710	WT-µg-LD	WT-1g-LD	997.804	313.988	1.66805	0.0237468
259378_at	mitotic phosphoprotein N' end (MPPN) family protein	AT3G16310	AT3G16310	WT-µg-LD	WT-1g-LD	1044.04	328.587	1.66783	0.00254697
245121_at	60S ribosomal protein L7a-1	AT2G47610	AT2G47610	WT-µg-LD	WT-1g-LD	4674.27	1472.88	1.66611	0.00580288
251638_at	40S ribosomal protein S2-4	AT3G57490	AT3G57490	WT-µg-LD	WT-1g-LD	836.378	263.574	1.66595	0.00867069
267406_at	MEE22 (MATERNAL EFFECT EMBRYO ARREST 22)	MEE22	AT2G34780	WT-µg-LD	WT-1g-LD	188.077	59.309	1.665	0.0298963
248359_at	hypothetical protein	AT5G52410	AT5G52410	WT-µg-LD	WT-1g-LD	111.58	35.1943	1.66466	0.00302116
252368_at	CYP94B3; electron carrier/ heme binding / iron ion binding / monooxygenase/ oxygen binding	CYP94B3	AT3G48520	WT-µg-LD	WT-1g-LD	1641.99	518.349	1.66345	0.0222715
252274_at	BCAT3 (BRANCHED-CHAIN AMINOTRANSFERASE 3); branched-chain-amino-acid transaminase/ catalytic	BCAT3	AT3G49680	WT-µg-LD	WT-1g-LD	839.936	265.373	1.66226	0.00455496
260426_at	P40; structural constituent of ribosome	P40	AT1G72370	WT-µg-LD	WT-1g-LD	9631.62	3043.11	1.66223	0.00440402
249288_at	pollen Ole e 1 allergen and extensin family protein	AT5G41050	AT5G41050	WT-µg-LD	WT-1g-LD	169.567	53.5798	1.6621	0.000636521
258521_at	60S ribosomal protein L29-2	AT3G06680	AT3G06680	WT-µg-LD	WT-1g-LD	2262.47	715.287	1.66131	0.00297128
246772_at	Integral membrane Yip1 family protein	AT5G27490	AT5G27490	WT-µg-LD	WT-1g-LD	175.142	55.3964	1.66066	0.0269566
255785_at	APS2; sulfate adenylyltransferase (ATP)	APS2	AT1G19920	WT-µg-LD	WT-1g-LD	1436.37	454.942	1.65867	0.0491931
252990_at	transcriptional elongation regulator MINIYO	AT4G38440	AT4G38440	WT-µg-LD	WT-1g-LD	187.677	59.4938	1.65744	0.0256152
260137_at	putative senescence-associated protein	AT1G66330	AT1G66330	WT-µg-LD	WT-1g-LD	2135.85	677.87	1.65573	0.0203771
254496_at	ATAAH (Arabidopsis thaliana Allantoate Amidohydrolase); allantoate deiminase/ metallopeptidase	ATAAH	AT4G20070	WT-µg-LD	WT-1g-LD	1233.58	391.669	1.65514	0.0533415
250625_at	calnexin2	AT5G07340	AT5G07340	WT-µg-LD	WT-1g-LD	1473.71	467.94	1.65505	0.0432635
261793_at	hypothetical protein	AT1G16080	AT1G16080	WT-µg-LD	WT-1g-LD	506.943	160.992	1.65484	0.0349639
262395_at	elongator protein 2	ELP2	AT1G49540	WT-µg-LD	WT-1g-LD	216.635	68.8043	1.65469	0.0095699
259098_at	ribose 5-phosphate isomerase A	AT3G04790	AT3G04790	WT-µg-LD	WT-1g-LD	4388.43	1394.19	1.65428	0.00456715
251110_at	carbohydrate-binding domain-containing protein	AT5G01260	AT5G01260	WT-µg-LD	WT-1g-LD	192.559	61.2098	1.65347	0.0535218
266662_at	YebC-related protein	AT2G25830	AT2G25830	WT-µg-LD	WT-1g-LD	358.778	114.088	1.65295	0.0046536
250531_at	small GTP-binding protein	AT5G08650	AT5G08650	WT-µg-LD	WT-1g-LD	1108.18	352.707	1.65165	0.00739514
247449_at	chloride conductance regulatory protein ICln	AT5G62290	AT5G62290	WT-µg-LD	WT-1g-LD	674.642	214.813	1.65104	0.0378213
250856_at	pentatricopeptide (PPR) repeat-containing protein	AT5G04810	AT5G04810	WT-µg-LD	WT-1g-LD	998.047	318.111	1.64958	0.0134181
247420_at	S-adenosyl-L-methionine-dependent methyltransferase domain-containing protein	AT5G63100	AT5G63100	WT-µg-LD	WT-1g-LD	85.8007	27.3619	1.64882	0.0168134
251008_at	hypothetical protein	AT5G02710	AT5G02710	WT-µg-LD	WT-1g-LD	403.795	128.786	1.64864	0.0409095
249365_at	hypothetical protein	AT5G40600	AT5G40600	WT-µg-LD	WT-1g-LD	123.449	39.3816	1.64832	0.0139333
267088_at	PSRP4 (PLASTID-SPECIFIC RIBOSOMAL PROTEIN 4); structural constituent of ribosome	PSRP4	AT2G38140	WT-µg-LD	WT-1g-LD	2045.94	652.738	1.64819	0.0102173
247813_at	lactate/malate dehydrogenase family protein	AT5G58330	AT5G58330	WT-µg-LD	WT-1g-LD	3080.9	983.498	1.64736	0.0108773
246758_at	60S ribosomal protein L18-3	AT5G27850	AT5G27850	WT-µg-LD	WT-1g-LD	6947.37	2220.61	1.64551	0.0146184
245353_at	hypothetical protein	AT4G16000	AT4G16000	WT-µg-LD	WT-1g-LD	415.878	132.975	1.64501	0.00869442
246310_at	SULTR3;1 (SULFATE TRANSPORTER 3;1); secondary active sulfate transmembrane transporter/ sulfate transmembrane transporter/ transporter	SULTR3;1	AT3G51895	WT-µg-LD	WT-1g-LD	847.447	270.988	1.64489	0.000802561
248541_at	protein kinase family protein	AT5G50180	AT5G50180	WT-µg-LD	WT-1g-LD	213.196	68.1805	1.64475	0.0267196
257141_at	60S ribosomal protein L34-3	AT3G28900	AT3G28900	WT-µg-LD	WT-1g-LD	1939.01	620.341	1.64419	0.0390997
254327_at	bifunctional inhibitor/lipid-transfer protein/seed storage 2S albumin superfamily protein	AT4G22490	AT4G22490	WT-µg-LD	WT-1g-LD	224.807	71.977	1.64308	0.0198819
246736_at	hypothetical protein	AT5G27560	AT5G27560	WT-µg-LD	WT-1g-LD	752.862	241.128	1.64259	0.0537249
264340_at	NHL domain-containing protein	AT1G70280	AT1G70280	WT-µg-LD	WT-1g-LD	146.48	46.9374	1.64189	0.0386076
244993_s_at	Ycf1	ycf1	ATCG01000 /// ATCG01130	WT-µg-LD	WT-1g-LD	1871.5	600.381	1.64024	0.0481539
259927_at	JAC1 (J-DOMAIN PROTEIN REQUIRED FOR CHLOROPLAST ACCUMULATION RESPONSE 1); heat shock protein binding	JAC1	AT1G75100	WT-µg-LD	WT-1g-LD	1670.94	536.376	1.63935	0.0508898
263556_at	F-box protein	AT2G16365	AT2G16365	WT-µg-LD	WT-1g-LD	578.029	185.719	1.63802	0.00937963
256468_at	ferredoxin C2	AT1G32550	AT1G32550	WT-µg-LD	WT-1g-LD	885.498	284.512	1.638	0.0119656
266076_at	DEAD-box ATP-dependent RNA helicase 17	AT2G40700	AT2G40700	WT-µg-LD	WT-1g-LD	283.116	90.9721	1.6379	0.00569566
265596_at	CAF1; RNA splicing factor, transesterification mechanism	CAF1	AT2G20020	WT-µg-LD	WT-1g-LD	359.064	115.385	1.63778	0.00902396
264267_at	splicing factor PWI and RNA recognition motif-containing protein	AT1G60200	AT1G60200	WT-µg-LD	WT-1g-LD	92.3421	29.7097	1.63606	0.0308039
259199_at	peptidase S24/S26A/S26B/S26C family protein	AT3G08980	AT3G08980	WT-µg-LD	WT-1g-LD	248.135	79.9484	1.63398	0.0109766
261881_at	NIP6;1 (NOD26-LIKE INTRINSIC PROTEIN 6;1); boron transporter/ glycerol transmembrane transporter/ urea transmembrane transporter/ water channel/ water transporter	NIP6;1	AT1G80760	WT-µg-LD	WT-1g-LD	164.921	53.1542	1.63352	0.026762
251783_at	RPL23AB (RIBOSOMAL PROTEIN L23AB); RNA binding / nucleotide binding / structural constituent of ribosome	RPL23AB	AT3G55280	WT-µg-LD	WT-1g-LD	2394.12	771.967	1.63288	0.00273002
261166_s_at	essential protein Yae1, N-terminal-domain-containing protein	AT1G34570	AT1G34570 /// AT3G15750	WT-µg-LD	WT-1g-LD	185.154	59.7295	1.63221	0.00879433
251679_at	calcium-dependent phosphotriesterase superfamily protein	AT3G57030	AT3G57030	WT-µg-LD	WT-1g-LD	540.651	174.417	1.63215	0.0311468
250846_at	SIR; sulfite reductase (ferredoxin)/ sulfite reductase	SIR	AT5G04590	WT-µg-LD	WT-1g-LD	3661.82	1181.33	1.63215	0.0136404
247257_at	RPN5B (REGULATORY PARTICLE NON-ATPASE SUBUNIT 5B)	RPN5B	AT5G64760	WT-µg-LD	WT-1g-LD	345.516	111.502	1.63168	0.013636
255557_at	pentatricopeptide repeat-containing protein	AT4G01990	AT4G01990	WT-µg-LD	WT-1g-LD	150.985	48.7502	1.63093	0.0242536
250371_at	PsbP domain-containing protein 5	AT5G11450	AT5G11450	WT-µg-LD	WT-1g-LD	1214.05	392.675	1.62842	0.00982492
258977_s_at	AK3 (ASPARTATE KINASE 3); aspartate kinase	AK3	AT3G02020 /// AT5G14060	WT-µg-LD	WT-1g-LD	650.531	210.576	1.62728	0.0173555
250843_at	BTR1L (BINDING TO TOMV RNA 1L (LONG FORM)); nucleic acid binding	BTR1L	AT5G04430	WT-µg-LD	WT-1g-LD	2388.67	773.515	1.6267	0.00693038
258331_at	coatomer subunit beta'-3	AT3G15980	AT3G15980	WT-µg-LD	WT-1g-LD	1495.49	484.337	1.62654	0.0512529
259770_s_at	PAI3 (phosphoribosylanthranilate isomerase 3); phosphoribosylanthranilate isomerase	PAI3	AT1G07780 /// AT1G29410 /// AT5G05590	WT-µg-LD	WT-1g-LD	429.652	139.156	1.62646	0.0115463
254612_at	hypothetical protein	AT4G19100	AT4G19100	WT-µg-LD	WT-1g-LD	348.289	112.812	1.62637	0.0151517
246178_s_at	---	---	AT3G60930 /// AT5G28430	WT-µg-LD	WT-1g-LD	184.86	59.9408	1.62482	0.0105829
263420_at	hypothetical protein	AT2G17240	AT2G17240	WT-µg-LD	WT-1g-LD	1585.79	514.463	1.62406	0.0136056
246278_at	hypothetical protein	AT4G37190	AT4G37190	WT-µg-LD	WT-1g-LD	313.105	101.618	1.62349	0.00463243
264638_at	FT (FLOWERING LOCUS T); phosphatidylethanolamine binding / protein binding	FT	AT1G65480	WT-µg-LD	WT-1g-LD	59.4334	19.311	1.62185	0.0271459
263619_at	ADP-glucose pyrophosphorylase-like protein	AT2G04650	AT2G04650	WT-µg-LD	WT-1g-LD	119.77	38.9431	1.62083	0.0149723
261224_at	ATSBT5.2; identical protein binding / serine-type endopeptidase	ATSBT5.2	AT1G20160	WT-µg-LD	WT-1g-LD	316.358	102.948	1.61964	0.0541198
246743_at	FBD-associated F-box protein	AT5G27750	AT5G27750	WT-µg-LD	WT-1g-LD	188.949	61.4914	1.61954	0.00478551
253205_at	ATCAP1 (ARABIDOPSIS THALIANA CYCLASE ASSOCIATED PROTEIN 1); actin binding	ATCAP1	AT4G34490	WT-µg-LD	WT-1g-LD	1245.87	405.644	1.61886	0.0231436
264591_at	pentatricopeptide repeat-containing protein	AT2G17670	AT2G17670	WT-µg-LD	WT-1g-LD	404.077	131.576	1.61874	0.0105445
260769_at	myb/SANT-like DNA-binding domain-containing protein	AT1G49010	AT1G49010	WT-µg-LD	WT-1g-LD	371.071	120.874	1.61819	0.0437068
254862_at	probable sodium/metabolite cotransporter BASS5	BAT5	AT4G12030	WT-µg-LD	WT-1g-LD	244.665	79.7029	1.6181	0.0257967
247508_at	ARF2 (AUXIN RESPONSE FACTOR 2); protein binding / transcription factor	ARF2	AT5G62000	WT-µg-LD	WT-1g-LD	791.516	257.864	1.61801	0.0192996
264259_at	hypothetical protein	AT1G09290	AT1G09290	WT-µg-LD	WT-1g-LD	129.058	42.0672	1.61725	0.0251296
249327_at	ATCLC-A (CHLORIDE CHANNEL A); anion channel/ nitrate transmembrane transporter/ voltage-gated chloride channel	ATCLC-A	AT5G40890	WT-µg-LD	WT-1g-LD	3051.26	994.859	1.61684	0.0189102
254102_at	ACP4 (acyl carrier protein 4); acyl carrier	ACP4	AT4G25050	WT-µg-LD	WT-1g-LD	5169.31	1686	1.61637	0.0185618
259015_at	hypothetical protein	AT3G07350	AT3G07350	WT-µg-LD	WT-1g-LD	1255.58	409.671	1.61581	0.0103918
247032_at	SDN3 (SMALL RNA DEGRADING NUCLEASE 3); exonuclease/ nucleic acid binding	SDN3	AT5G67240	WT-µg-LD	WT-1g-LD	597.276	194.945	1.61533	0.00291991
260685_at	GLYR2 (GLYOXYLATE REDUCTASE 2); glyoxylate reductase (NADP)/ phosphogluconate dehydrogenase (decarboxylating)	GLYR2	AT1G17650	WT-µg-LD	WT-1g-LD	225.526	73.6516	1.61451	0.00945581
258985_at	ARM repeat superfamily protein	AT3G08960	AT3G08960	WT-µg-LD	WT-1g-LD	121.901	39.8129	1.6144	0.028367
265944_at	ASHR2 (ASH1-RELATED PROTEIN 2)	ASHR2	AT2G19640	WT-µg-LD	WT-1g-LD	161.196	52.6487	1.61435	0.00764901
257555_at	hypothetical protein	AT3G24780	AT3G24780	WT-µg-LD	WT-1g-LD	55.8833	18.2626	1.61353	0.0160136
248094_at	trigger factor type chaperone family protein	AT5G55220	AT5G55220	WT-µg-LD	WT-1g-LD	240.56	78.632	1.61321	0.00712572
252886_at	CESA2 (CELLULOSE SYNTHASE A2); cellulose synthase/ transferase, transferring glycosyl groups	CESA2	AT4G39350	WT-µg-LD	WT-1g-LD	840.139	274.643	1.61307	0.0125453
265706_at	uvrB/uvrC motif-containing protein	AT2G03390	AT2G03390	WT-µg-LD	WT-1g-LD	421.73	137.869	1.61302	0.00274671
248632_at	SLD5 (SYNTHETIC LETHALITY WITH DPB11-1 5)	SLD5	AT5G49010	WT-µg-LD	WT-1g-LD	147.636	48.2912	1.61221	0.0404521
251007_at	60S ribosomal protein L35-4	AT5G02610	AT5G02610	WT-µg-LD	WT-1g-LD	2063.32	674.909	1.6122	0.00597622
245594_at	acylamino acid-releasing enzyme	AT4G14570	AT4G14570	WT-µg-LD	WT-1g-LD	244.269	79.9833	1.6107	0.0146284
253141_at	CLC-E (CHLORIDE CHANNEL E); ion channel/ voltage-gated chloride channel	CLC-E	AT4G35440	WT-µg-LD	WT-1g-LD	224.07	73.407	1.60996	0.0130415
263859_at	hypothetical protein	AT2G04360	AT2G04360	WT-µg-LD	WT-1g-LD	722.366	236.709	1.60962	0.0240096
251490_at	hypothetical protein	AT3G59490	AT3G59490	WT-µg-LD	WT-1g-LD	176.822	57.9871	1.60849	0.00968179
252492_at	TOC75-III (TRANSLOCON AT THE OUTER ENVELOPE MEMBRANE OF CHLOROPLASTS 75-III); P-P-bond-hydrolysis-driven protein transmembrane transporter	TOC75-III	AT3G46740	WT-µg-LD	WT-1g-LD	1143.77	375.204	1.60805	0.00799226
260815_at	TIC110 (TRANSLOCON AT THE INNER ENVELOPE MEMBRANE OF CHLOROPLASTS 110)	TIC110	AT1G06950	WT-µg-LD	WT-1g-LD	1303.34	427.713	1.6075	0.0189077
260070_at	BEE3 (BR ENHANCED EXPRESSION 3); DNA binding / transcription factor	BEE3	AT1G73830	WT-µg-LD	WT-1g-LD	179.051	58.7748	1.6071	0.00287106
250434_at	histone H3 /// histone H3 /// histone H3 /// histone H3 /// histone H3.1	AT1G09200 /// AT3G27360 /// AT5G10390 /// AT5G10400 /// AT5G65360	AT5G10390	WT-µg-LD	WT-1g-LD	293.72	96.4229	1.60699	0.00783067
262368_at	Leucine-rich repeat family protein /// low PSII accumulation 3 protein	AT1G73066 /// LPA3	AT1G73060	WT-µg-LD	WT-1g-LD	1036.21	340.249	1.60665	0.0023797
263729_at	3'-5'-exoribonuclease family protein	AT1G60080	AT1G60080	WT-µg-LD	WT-1g-LD	210.664	69.2615	1.60482	0.0117542
260548_at	BIO2 (BIOTIN AUXOTROPH 2); biotin synthase	BIO2	AT2G43360	WT-µg-LD	WT-1g-LD	348.884	114.707	1.60479	0.00739942
259473_at	DNA repair metallo-beta-lactamase family protein	AT1G19025	AT1G19025	WT-µg-LD	WT-1g-LD	764.138	251.448	1.60357	0.0102798
264700_at	hypothetical protein	AT1G70100	AT1G70100	WT-µg-LD	WT-1g-LD	614.521	202.339	1.60269	0.0101227
258814_at	NAD(P)-binding Rossmann-fold superfamily protein	AT3G03980	AT3G03980	WT-µg-LD	WT-1g-LD	371.479	122.389	1.60181	0.0118641
253025_at	ARM repeat superfamily protein	AT4G38120	AT4G38120	WT-µg-LD	WT-1g-LD	131.969	43.5085	1.60083	0.0405181
265078_at	ECT4	ECT4	AT1G55500	WT-µg-LD	WT-1g-LD	445.485	147.065	1.59892	0.0545621
254958_at	NDPK3 (NUCLEOSIDE DIPHOSPHATE KINASE 3); ATP binding / nucleoside diphosphate kinase	NDPK3	AT4G11010	WT-µg-LD	WT-1g-LD	2590.62	855.275	1.59883	0.0127269
258410_at	60S ribosomal protein L19-2	AT3G16780	AT3G16780	WT-µg-LD	WT-1g-LD	1383.53	458.882	1.59216	0.00781716
254051_at	pentatricopeptide repeat protein OTP70	AT4G25270	AT4G25270	WT-µg-LD	WT-1g-LD	89.5292	29.7054	1.59163	0.0310891
254011_at	antitermination NusB domain-containing protein	AT4G26370	AT4G26370	WT-µg-LD	WT-1g-LD	325.067	107.899	1.59105	0.00356322
262573_at	PDF1A (PEPTIDE DEFORMYLASE 1A); peptide deformylase	PDF1A	AT1G15390	WT-µg-LD	WT-1g-LD	535.858	178.045	1.58961	2.54177e-06
262965_at	putative RNA binding protein	AT1G54310	AT1G54310	WT-µg-LD	WT-1g-LD	167.334	55.6003	1.58956	0.0152491
248140_at	hypothetical protein	AT5G54980	AT5G54980	WT-µg-LD	WT-1g-LD	1020.07	339.121	1.5888	0.0089827
255264_at	transcription factor bHLH114	AT4G05170	AT4G05170	WT-µg-LD	WT-1g-LD	86.1874	28.66	1.58844	0.0343308
253547_at	FAD6 (FATTY ACID DESATURASE 6); omega-6 fatty acid desaturase	FAD6	AT4G30950	WT-µg-LD	WT-1g-LD	3984.89	1325.23	1.5883	0.0101677
267057_at	Stress responsive alpha-beta barrel domain protein	AT2G32500	AT2G32500	WT-µg-LD	WT-1g-LD	179.619	59.7624	1.58763	0.0222321
261377_at	hypothetical protein	AT1G18850	AT1G18850	WT-µg-LD	WT-1g-LD	599.447	199.619	1.58638	0.0106191
255332_at	early-responsive to dehydration stress-related protein	AT4G04340	AT4G04340	WT-µg-LD	WT-1g-LD	589.91	196.461	1.58625	0.042962
267175_s_at	ACT1 (ACTIN 1); structural constituent of cytoskeleton	ACT1	AT2G37620 /// AT3G53750	WT-µg-LD	WT-1g-LD	476.117	158.6	1.58592	0.0103486
260605_at	hypothetical protein	AT2G43780	AT2G43780	WT-µg-LD	WT-1g-LD	371.992	123.944	1.58559	0.0094423
253533_at	ATCSLC5 (CELLULOSE-SYNTHASE LIKE C5); cellulose synthase/ transferase, transferring glycosyl groups	ATCSLC5	AT4G31590	WT-µg-LD	WT-1g-LD	98.8655	32.9552	1.58496	0.0294694
251172_at	RRF (RIBOSOME RECYCLING FACTOR, CHLOROPLAST PRECURSOR)	RRF	AT3G63190	WT-µg-LD	WT-1g-LD	977.754	326.109	1.58412	0.00902548
253256_at	S-adenosyl-L-methionine-dependent methyltransferase-like protein	AT4G34360	AT4G34360	WT-µg-LD	WT-1g-LD	119.916	40.0052	1.58376	0.00547204
245719_at	DNA gyrase B3	GYRB3	AT5G04110	WT-µg-LD	WT-1g-LD	54.5845	18.2278	1.58235	0.0280929
260641_at	hypothetical protein	AT1G53200	AT1G53200	WT-µg-LD	WT-1g-LD	290.995	97.2122	1.58179	0.000747683
247316_at	putative methyltransferase PMT26	AT5G64030	AT5G64030	WT-µg-LD	WT-1g-LD	659.381	220.299	1.58165	0.00524849
247654_at	40S ribosomal protein S15a-1 /// 40S ribosomal protein S15a-1	AT5G59850 /// RPS15A	AT5G59850	WT-µg-LD	WT-1g-LD	4801.87	1604.41	1.58155	0.00394932
255194_at	WD-40 protein PCN	AT4G07410	AT4G07410	WT-µg-LD	WT-1g-LD	615.901	206.037	1.5798	0.00218372
251151_at	Chalcone-flavanone isomerase family protein	AT3G63170	AT3G63170	WT-µg-LD	WT-1g-LD	344.363	115.276	1.57883	0.0464912
250444_at	putative beta-D-xylosidase 6	AT5G10560	AT5G10560	WT-µg-LD	WT-1g-LD	661.802	221.58	1.57857	0.00790642
263519_at	40S ribosomal protein S25-2	AT2G21580	AT2G21580	WT-µg-LD	WT-1g-LD	2630.8	880.844	1.57855	0.00244933
264199_at	Ycf37-like photosystem I biogenesis related protein	AT1G22700	AT1G22700	WT-µg-LD	WT-1g-LD	660.207	221.084	1.57832	0.0258367
261519_at	bc1 complex kinase ABC1K5	AT1G71810	AT1G71810	WT-µg-LD	WT-1g-LD	335.688	112.413	1.57831	0.0364802
245095_at	protein kinase and PP2C-like domain-containing protein	AT2G40860	AT2G40860	WT-µg-LD	WT-1g-LD	70.9123	23.7497	1.57813	0.0316809
259013_at	emb1990 (embryo defective 1990)	emb1990	AT3G07430	WT-µg-LD	WT-1g-LD	1479.38	495.61	1.57772	0.00185784
257172_at	ribosomal protein S1-like RNA-binding domain-containing protein	AT3G23700	AT3G23700	WT-µg-LD	WT-1g-LD	2000.62	670.693	1.57672	0.0152664
257176_s_at	cyclopropane-fatty-acyl-phospholipid synthase /// Cyclopropane-fatty-acyl-phospholipid synthase	AT3G23510 /// AT3G23530	AT3G23510 /// AT3G23530	WT-µg-LD	WT-1g-LD	596.87	200.195	1.57601	0.047124
250087_at	tetratricopeptide repeat-containing protein	AT5G17270	AT5G17270	WT-µg-LD	WT-1g-LD	189.992	63.7325	1.57584	0.00294754
257131_at	mitochondrial substrate carrier family protein	AT3G20240	AT3G20240	WT-µg-LD	WT-1g-LD	150.014	50.3368	1.57541	0.0039976
248104_at	IAMT1 (IAA CARBOXYLMETHYLTRANSFERASE 1); S-adenosylmethionine-dependent methyltransferase/ indole acetic acid carboxyl methyltransferase	IAMT1	AT5G55250	WT-µg-LD	WT-1g-LD	78.1444	26.2296	1.57495	0.0280074
258321_at	ELIP1 (EARLY LIGHT-INDUCABLE PROTEIN); chlorophyll binding	ELIP1	AT3G22840	WT-µg-LD	WT-1g-LD	386.741	129.838	1.57466	0.0154265
246910_at	polynucleotidyl transferase, ribonuclease H-like superfamily protein	AT5G25800	AT5G25800	WT-µg-LD	WT-1g-LD	297.374	99.8586	1.57432	0.00702463
262650_at	---	---	AT1G14090	WT-µg-LD	WT-1g-LD	53.7517	18.0542	1.57398	0.0130461
251535_at	hypothetical protein	AT3G58540	AT3G58540	WT-µg-LD	WT-1g-LD	71.0724	23.8821	1.57336	0.00573041
245670_at	ATJ1; heat shock protein binding / nucleic acid binding / unfolded protein binding / zinc ion binding	ATJ1	AT1G28210	WT-µg-LD	WT-1g-LD	161.364	54.2379	1.57294	0.00712527
248768_at	60S acidic ribosomal protein P1-3	AT5G47700	AT5G47700	WT-µg-LD	WT-1g-LD	4226.05	1421.05	1.57236	0.0466579
266981_at	RPL23AA (RIBOSOMAL PROTEIN L23AA); RNA binding / nucleotide binding / structural constituent of ribosome	RPL23AA	AT2G39460	WT-µg-LD	WT-1g-LD	5346.61	1799.34	1.57116	0.00354981
263624_at	Ferredoxin-thioredoxin reductase catalytic chain	AT2G04700	AT2G04700	WT-µg-LD	WT-1g-LD	3368.88	1134.36	1.57039	0.00206199
254343_at	APR3 (APS REDUCTASE 3); adenylyl-sulfate reductase	43558	AT4G21990	WT-µg-LD	WT-1g-LD	672.517	226.617	1.56932	0.0193053
247566_at	40S ribosomal protein S19-3	AT5G61170	AT5G61170	WT-µg-LD	WT-1g-LD	3740.48	1260.9	1.56877	0.0033409
251360_at	S-adenosyl-L-methionine-dependent methyltransferases superfamily protein	AT3G61210	AT3G61210	WT-µg-LD	WT-1g-LD	962.845	324.802	1.56774	0.013951
249759_at	YSL2 (YELLOW STRIPE LIKE 2); oligopeptide transporter	YSL2	AT5G24380	WT-µg-LD	WT-1g-LD	455.609	153.7	1.56767	0.0217394
255888_at	pentatricopeptide repeat-containing protein	AT1G20300	AT1G20300	WT-µg-LD	WT-1g-LD	497.881	167.968	1.56761	0.0167352
265389_at	lumazine-binding family protein	AT2G20690	AT2G20690	WT-µg-LD	WT-1g-LD	389.985	131.603	1.56722	0.0348688
264337_at	hypothetical protein	AT1G70350	AT1G70350	WT-µg-LD	WT-1g-LD	369.746	124.81	1.5668	0.047544
259722_at	ATRECQ4B (ARABIDOPSIS RECQ HELICASE L4B); ATP binding / ATP-dependent helicase/ DNA helicase/ catalytic/ helicase/ nucleic acid binding / nucleotide binding	ATRECQ4B	AT1G60930	WT-µg-LD	WT-1g-LD	50.3012	16.9868	1.56618	0.0359868
250192_at	pescadillo-related protein	AT5G14520	AT5G14520	WT-µg-LD	WT-1g-LD	2574.97	870.208	1.56512	0.00327855
262056_at	Spc97 / Spc98 family of spindle pole body (SBP) component	AT1G80245	AT1G80245	WT-µg-LD	WT-1g-LD	256.334	86.6285	1.56511	0.0333076
254683_at	hypothetical protein	AT4G13800	AT4G13800	WT-µg-LD	WT-1g-LD	124.196	41.9734	1.56507	0.0116152
258454_at	RPS10 (RIBOSOMAL PROTEIN S10); structural constituent of ribosome	RPS10	AT3G22300	WT-µg-LD	WT-1g-LD	538.54	182.036	1.56483	0.0392126
266329_at	CRR3 (CHLORORESPIRATORY REDUCTION 3)	CRR3	AT2G01590	WT-µg-LD	WT-1g-LD	333.495	112.743	1.56463	0.0167116
266671_at	ASA2 (ANTHRANILATE SYNTHASE 2); anthranilate synthase	ASA2	AT2G29690	WT-µg-LD	WT-1g-LD	307.901	104.158	1.56369	0.0103968
257318_at	hypothetical protein /// ATP synthase 9	ArthMp095 /// AT2G07777	AT2G07777 /// ATMG01090	WT-µg-LD	WT-1g-LD	419.833	142.134	1.56257	0.0268075
245090_at	nodulin MtN21-like transporter family protein	AT2G40900	AT2G40900	WT-µg-LD	WT-1g-LD	317.771	107.693	1.56106	0.0101961
244969_at	30S ribosomal protein S18	rps18	ATCG00650	WT-µg-LD	WT-1g-LD	1831.32	620.934	1.56037	0.00154102
252917_at	B-box type zinc finger-containing protein	AT4G38960	AT4G38960	WT-µg-LD	WT-1g-LD	739.61	250.88	1.55977	0.00449279
253216_at	cyclophilin-like peptidyl-prolyl cis-trans isomerase family protein	AT4G34960	AT4G34960	WT-µg-LD	WT-1g-LD	452.215	153.403	1.55968	0.0504579
266684_at	rps15ab (ribosomal protein S15A B); structural constituent of ribosome	rps15ab	AT2G19720	WT-µg-LD	WT-1g-LD	155.918	52.9126	1.55911	0.00386952
264262_at	histone H3 /// histone H3 /// histone H3 /// histone H3 /// histone H3.1	AT1G09200 /// AT3G27360 /// AT5G10390 /// AT5G10400 /// AT5G65360	AT1G09200	WT-µg-LD	WT-1g-LD	560.406	190.344	1.55787	0.0290556
256253_at	60S acidic ribosomal protein P0-3	AT3G11250	AT3G11250	WT-µg-LD	WT-1g-LD	439.592	149.323	1.55773	0.0151392
258755_at	homogentisate farnesyltransferase/ homogentisate geranylgeranyltransferase/ homogentisate solanesyltransferase	ATHST	AT3G11945	WT-µg-LD	WT-1g-LD	1105.99	376.098	1.55616	0.0302997
249233_at	Glutathione S-transferase family protein	AT5G42150	AT5G42150	WT-µg-LD	WT-1g-LD	915.595	311.451	1.5557	0.0112021
258086_at	LTA2; dihydrolipoyllysine-residue acetyltransferase	LTA2	AT3G25860	WT-µg-LD	WT-1g-LD	878.56	299.038	1.55481	0.0261917
255576_at	nodulin MtN21-like transporter family protein	AT4G01440	AT4G01440	WT-µg-LD	WT-1g-LD	151.148	51.4559	1.55456	0.00361742
251095_at	hypothetical protein	RUS5	AT5G01510	WT-µg-LD	WT-1g-LD	101.471	34.545	1.55451	0.0304753
265990_at	alpha/beta-Hydrolases superfamily protein	AT2G24280	AT2G24280	WT-µg-LD	WT-1g-LD	681.752	232.351	1.55294	0.00104748
259880_at	5-formyltetrahydrofolate cyclo-ligase paralogous protein	AT1G76730	AT1G76730	WT-µg-LD	WT-1g-LD	1291.04	440.301	1.55197	0.000238476
248282_at	membrane-associated kinase regulator family protein	AT5G52900	AT5G52900	WT-µg-LD	WT-1g-LD	499.152	170.263	1.55172	0.011677
259840_at	PSAH2 (PHOTOSYSTEM I SUBUNIT H2)	PSAH2	AT1G52230	WT-µg-LD	WT-1g-LD	4810.88	1641.57	1.55122	0.0284273
250906_at	SBE2.2 (starch branching enzyme 2.2); 1,4-alpha-glucan branching enzyme	SBE2.2	AT5G03650	WT-µg-LD	WT-1g-LD	488.858	166.88	1.5506	0.00958916
261375_at	SPL4 (SQUAMOSA PROMOTER BINDING PROTEIN-LIKE 4); DNA binding / transcription factor	SPL4	AT1G53160	WT-µg-LD	WT-1g-LD	191.752	65.4824	1.55006	0.0351692
247899_at	hypothetical protein	AT5G57345	AT5G57345	WT-µg-LD	WT-1g-LD	1608.95	549.56	1.54977	0.00618993
260673_at	hypothetical protein	AT1G19330	AT1G19330	WT-µg-LD	WT-1g-LD	483.536	165.228	1.54917	0.00894989
256379_at	protein PLASTID MOVEMENT IMPAIRED 2	AT1G66840	AT1G66840	WT-µg-LD	WT-1g-LD	221.415	75.6661	1.54904	0.0167733
253949_at	AR192; adenyl-nucleotide exchange factor/ chaperone binding / protein binding / protein homodimerization	AR192	AT4G26780	WT-µg-LD	WT-1g-LD	226.696	77.4712	1.54903	0.00654939
267126_s_at	ACL (ACETONE-CYANOHYDRIN LYASE); hydrolase/ hydrolase, acting on ester bonds / methyl indole-3-acetate esterase/ methyl jasmonate esterase/ methyl salicylate esterase	ACL	AT2G23590 /// AT2G23600	WT-µg-LD	WT-1g-LD	6597.24	2254.68	1.54894	0.0255161
257218_at	RNA-editing factor interacting protein 1	AT3G15000	AT3G15000	WT-µg-LD	WT-1g-LD	1077.11	368.33	1.54809	0.00647085
258355_at	pentatricopeptide repeat-containing protein	AT3G14330	AT3G14330	WT-µg-LD	WT-1g-LD	120.562	41.24	1.54766	0.00617609
261419_at	Sas10/Utp3/C1D family protein	AT1G07840	AT1G07840	WT-µg-LD	WT-1g-LD	463.614	158.613	1.54741	0.0090306
257755_at	translation elongation factor EF1B/ribosomal protein S6 family protein	AT3G18760	AT3G18760	WT-µg-LD	WT-1g-LD	482.009	164.919	1.5473	0.0131753
257911_at	GLYR1 (GLYOXYLATE REDUCTASE 1); 3-hydroxybutyrate dehydrogenase/ phosphogluconate dehydrogenase (decarboxylating)	GLYR1	AT3G25530	WT-µg-LD	WT-1g-LD	1212.28	414.869	1.547	0.0338053
266173_at	hypothetical protein	AT2G02410	AT2G02410	WT-µg-LD	WT-1g-LD	141.923	48.5718	1.54692	0.0399233
250462_at	putative inactive receptor kinase	AT5G10020	AT5G10020	WT-µg-LD	WT-1g-LD	190.242	65.1147	1.54678	0.0105638
259710_at	putative aminotransferase	AT1G77670	AT1G77670	WT-µg-LD	WT-1g-LD	399.303	136.789	1.54553	0.0255026
259248_at	HEAT SHOCK PROTEIN 89.1	Hsp89.1	AT3G07770	WT-µg-LD	WT-1g-LD	628.701	215.374	1.54553	0.00946539
248680_at	PANC (ARABIDOPSIS HOMOLOG OF BACTERIAL PANC); pantoate-beta-alanine ligase/ protein homodimerization	PANC	AT5G48840	WT-µg-LD	WT-1g-LD	209.973	71.9665	1.54481	0.0113168
260404_at	---	---	AT1G69950	WT-µg-LD	WT-1g-LD	104.476	35.8157	1.54451	0.0111427
246031_at	LA RNA-binding protein	AT5G21160	AT5G21160	WT-µg-LD	WT-1g-LD	957.034	328.25	1.54377	0.0329402
261882_at	PDE318 (pigment defective 318); GTP binding	PDE318	AT1G80770	WT-µg-LD	WT-1g-LD	816.847	280.255	1.54333	0.00127165
255285_at	hypothetical protein	AT4G04630	AT4G04630	WT-µg-LD	WT-1g-LD	127.429	43.726	1.54313	0.000201774
262452_at	hypothetical protein	AT1G11210	AT1G11210	WT-µg-LD	WT-1g-LD	2312.09	794.301	1.54144	0.011557
247974_at	effector of transcription2	ET2	AT5G56780	WT-µg-LD	WT-1g-LD	112.041	38.5055	1.54089	0.011657
252970_at	SAUR15 (SMALL AUXIN UPREGULATED 15)	SAUR15	AT4G38850	WT-µg-LD	WT-1g-LD	48.9416	16.8222	1.5407	0.0276226
249404_at	EMB506 (embryo defective 506); protein binding	EMB506	AT5G40160	WT-µg-LD	WT-1g-LD	337.76	116.1	1.54063	0.012926
251017_at	putative protein phosphatase 2C 67	AT5G02760	AT5G02760	WT-µg-LD	WT-1g-LD	146.036	50.2198	1.53999	0.0537487
256979_at	PSBTN (photosystem II subunit T)	PSBTN	AT3G21055	WT-µg-LD	WT-1g-LD	5332.67	1834.46	1.5395	0.0177538
252031_at	tetratricopeptide repeat (TPR)-containing protein	AT3G52140	AT3G52140	WT-µg-LD	WT-1g-LD	1368	470.629	1.53941	0.0150779
249344_at	ATPHB3 (PROHIBITIN 3)	ATPHB3	AT5G40770	WT-µg-LD	WT-1g-LD	2023.86	696.392	1.53914	0.00532583
262777_at	protein COILIN	AT1G13030	AT1G13030	WT-µg-LD	WT-1g-LD	228.87	78.8158	1.53797	0.0233064
245911_at	STT3A (STAUROSPORIN AND TEMPERATURE SENSITIVE 3-LIKE A); oligosaccharyl transferase	STT3A	AT5G19690	WT-µg-LD	WT-1g-LD	2132.41	734.356	1.53793	0.0400685
249628_at	tetratricopeptide repeat domain-containing protein	AT5G37590	AT5G37590	WT-µg-LD	WT-1g-LD	348.444	120.046	1.53734	0.00868356
254680_at	PHYE (PHYTOCHROME DEFECTIVE E); G-protein coupled photoreceptor/ protein histidine kinase/ signal transducer	PHYE	AT4G18130	WT-µg-LD	WT-1g-LD	664.186	228.889	1.53694	0.00772192
253692_at	ATPAO5 (Polyamine oxidase 5); amine oxidase/ electron carrier/ oxidoreductase	ATPAO5	AT4G29720	WT-µg-LD	WT-1g-LD	246.998	85.142	1.53656	0.0479614
260455_at	hypothetical protein	AT1G72500	AT1G72500	WT-µg-LD	WT-1g-LD	373.128	128.644	1.53628	0.00231474
261507_at	rbcL RNA S1-binding domain protein	AT1G71720	AT1G71720	WT-µg-LD	WT-1g-LD	542.879	187.175	1.53624	0.0127905
246532_at	glycosyl hydrolase family 81 protein	AT5G15870	AT5G15870	WT-µg-LD	WT-1g-LD	1697.22	585.241	1.53607	0.0149408
256706_at	O-fucosyltransferase family protein	AT3G30300	AT3G30300	WT-µg-LD	WT-1g-LD	330.253	113.913	1.53564	0.054732
256978_at	PUR7 (PURIN 7); phosphoribosylaminoimidazolesuccinocarboxamide synthase	PUR7	AT3G21110	WT-µg-LD	WT-1g-LD	381.235	131.653	1.53394	0.00616094
247073_at	PSBO1 (PS II OXYGEN-EVOLVING COMPLEX 1); oxygen evolving/ poly(U) binding	PSBO1	AT5G66570	WT-µg-LD	WT-1g-LD	13661.7	4718.07	1.53387	0.00932733
246879_at	protein kinase family protein	AT5G26110	AT5G26110	WT-µg-LD	WT-1g-LD	488.321	168.643	1.53385	0.00114855
259188_at	phosphoglucan phosphatase LSF1	LSF1	AT3G01510	WT-µg-LD	WT-1g-LD	349.478	120.717	1.53358	0.0179207
257406_at	regulator of chromosome condensation-like protein	AT1G27060	AT1G27060	WT-µg-LD	WT-1g-LD	237.201	81.9595	1.53313	0.0154156
251664_at	CRD1 (COPPER RESPONSE DEFECT 1); DNA binding / magnesium-protoporphyrin IX monomethyl ester (oxidative) cyclase	CRD1	AT3G56940	WT-µg-LD	WT-1g-LD	7965.71	2753.74	1.53241	0.0103482
249290_at	DHHC-type zinc finger family protein	AT5G41060	AT5G41060	WT-µg-LD	WT-1g-LD	82.1477	28.4199	1.53132	0.0324157
249940_at	anac090 (Arabidopsis NAC domain containing protein 90); transcription factor	anac090	AT5G22380	WT-µg-LD	WT-1g-LD	4461.3	1545.66	1.52924	0.0182114
258202_at	DNA binding / DNA-directed RNA polymerase	AT3G13940	AT3G13940	WT-µg-LD	WT-1g-LD	647.199	224.25	1.5291	0.011197
247404_at	Xanthine/uracil permease family protein	AT5G62890	AT5G62890	WT-µg-LD	WT-1g-LD	575.323	199.42	1.52856	0.00161678
259987_at	ATLP-3	ATLP-3	AT1G75030	WT-µg-LD	WT-1g-LD	92.9336	32.2183	1.52832	0.0270402
262113_at	late embryogenesis abundant 3-like protein	AT1G02820	AT1G02820	WT-µg-LD	WT-1g-LD	314.372	109.046	1.52754	0.0146106
250326_at	MSL10 (MECHANOSENSITIVE CHANNEL OF SMALL CONDUCTANCE-LIKE 10); mechanically-gated ion channel	MSL10	AT5G12080	WT-µg-LD	WT-1g-LD	125.736	43.6467	1.52646	0.0214532
257771_at	CIPK7 (CBL-INTERACTING PROTEIN KINASE 7); ATP binding / kinase/ protein kinase/ protein serine/threonine kinase	CIPK7	AT3G23000	WT-µg-LD	WT-1g-LD	3095.85	1074.98	1.52602	0.00616863
265594_at	large subunit ribosomal protein L4	AT2G20060	AT2G20060	WT-µg-LD	WT-1g-LD	1434.02	499.003	1.52294	0.0071502
251256_at	DUF724 family protein	DUF7	AT3G62300	WT-µg-LD	WT-1g-LD	100.343	34.9262	1.52256	0.0171239
256043_at	ribosomal protein S18	AT1G07210	AT1G07210	WT-µg-LD	WT-1g-LD	628.803	218.874	1.5225	0.013482
258674_at	elongation factor EF-P	AT3G08740	AT3G08740	WT-µg-LD	WT-1g-LD	2163.3	753.143	1.52224	0.0499089
258284_at	60S ribosomal protein L37-3	AT3G16080	AT3G16080	WT-µg-LD	WT-1g-LD	5771.66	2009.88	1.52188	0.00191402
254982_at	hypothetical protein	AT4G10470	AT4G10470	WT-µg-LD	WT-1g-LD	84.2505	29.3523	1.52121	0.00749502
264728_at	SNARE associated Golgi family protein	AT1G22850	AT1G22850	WT-µg-LD	WT-1g-LD	1502.17	523.595	1.52052	0.00799774
247902_at	AHA3; ATPase/ hydrogen-exporting ATPase, phosphorylative mechanism	AHA3	AT5G57350	WT-µg-LD	WT-1g-LD	2607.64	909.079	1.52027	0.0131465
249475_at	nucleic acid-binding, OB-fold-like protein	AT5G38890	AT5G38890	WT-µg-LD	WT-1g-LD	524.849	183.016	1.51993	0.0525459
261370_at	putative serine/threonine protein kinase	AT1G53050	AT1G53050	WT-µg-LD	WT-1g-LD	456.248	159.146	1.51947	0.00373922
252410_at	NOA1 (NO ASSOCIATED 1); GTPase/ nitric-oxide synthase	NOA1	AT3G47450	WT-µg-LD	WT-1g-LD	276.939	96.6119	1.51929	0.00802126
245175_at	UNE5 (UNFERTILIZED EMBRYO SAC 5); protein disulfide isomerase	UNE5	AT2G47470	WT-µg-LD	WT-1g-LD	6088.98	2124.9	1.51881	0.00950113
261931_at	GroES-like zinc-binding dehydrogenase family protein	AT1G22430	AT1G22430	WT-µg-LD	WT-1g-LD	413.292	144.235	1.51874	0.0125408
260541_at	defensin-like protein 194	AT2G43530	AT2G43530	WT-µg-LD	WT-1g-LD	473.892	165.453	1.51814	0.0177044
246319_at	Single-stranded nucleic acid binding R3H protein	AT3G56680	AT3G56680	WT-µg-LD	WT-1g-LD	2926.29	1021.88	1.51784	0.00363264
246231_at	hypothetical protein	AT4G37080	AT4G37080	WT-µg-LD	WT-1g-LD	120.251	41.9932	1.51781	0.0212398
260543_at	INT1 (INOSITOL TRANSPORTER 1); carbohydrate transmembrane transporter/ myo-inositol:hydrogen symporter/ sugar:hydrogen symporter	INT1	AT2G43330	WT-µg-LD	WT-1g-LD	843.902	294.851	1.51709	0.00657858
258724_at	MYB-like transcription factor	AT3G09600	AT3G09600	WT-µg-LD	WT-1g-LD	209.07	73.0852	1.51634	0.037125
254030_at	60S acidic ribosomal protein P3-1	AT4G25890	AT4G25890	WT-µg-LD	WT-1g-LD	946.953	331.177	1.51569	0.00461802
245147_at	ATRAD51C; ATP binding / damaged DNA binding / protein binding / recombinase/ single-stranded DNA binding	ATRAD51C	AT2G45280	WT-µg-LD	WT-1g-LD	188.989	66.1011	1.51556	0.000189962
254455_at	hypothetical protein	AT4G21140	AT4G21140	WT-µg-LD	WT-1g-LD	179.399	62.7652	1.51514	0.00919889
262202_at	APG2 (ALBINO AND PALE GREEN 2); proton motive force dependent protein transmembrane transporter	APG2	AT2G01110	WT-µg-LD	WT-1g-LD	1725.41	603.832	1.51472	0.0184376
251221_at	drought responsive ATP-binding motif containing protein	AT3G62550	AT3G62550	WT-µg-LD	WT-1g-LD	2706.44	947.931	1.51354	0.0370274
257352_at	IMB1 (IMBIBITION-INDUCIBLE 1); DNA binding	IMB1	AT2G34900	WT-µg-LD	WT-1g-LD	307.451	107.699	1.51335	0.0524434
267435_at	30S ribosomal protein S5	AT2G33800	AT2G33800	WT-µg-LD	WT-1g-LD	2736.18	959.177	1.51229	0.0453717
252028_at	Zn-dependent exopeptidases superfamily protein	AT3G52640	AT3G52640	WT-µg-LD	WT-1g-LD	145.143	50.936	1.51072	0.00888654
248669_at	pentatricopeptide repeat-containing protein	AT5G48730	AT5G48730	WT-µg-LD	WT-1g-LD	288.392	101.265	1.5099	0.0202413
266647_at	haloacid dehalogenase-like hydrolase family protein	AT2G25870	---	WT-µg-LD	WT-1g-LD	169.975	59.734	1.5087	0.0305657
253871_at	PORB (PROTOCHLOROPHYLLIDE OXIDOREDUCTASE B); oxidoreductase/ protochlorophyllide reductase	PORB	AT4G27440	WT-µg-LD	WT-1g-LD	1451.68	510.183	1.50864	0.020155
253237_at	ALDH3I1 (ALDEHYDE DEHYDROGENASE 3|1); 3-chloroallyl aldehyde dehydrogenase/ aldehyde dehydrogenase (NAD)	ALDH3I1	AT4G34240	WT-µg-LD	WT-1g-LD	825.506	290.262	1.50792	0.00800192
267247_at	photosystem II core phosphatase	AT2G30170	AT2G30170	WT-µg-LD	WT-1g-LD	682.292	240.027	1.50719	0.0438119
248576_at	MMT; S-adenosylmethionine-dependent methyltransferase	MMT	AT5G49810	WT-µg-LD	WT-1g-LD	930.244	327.352	1.50676	0.0393328
247187_at	hypothetical protein	AT5G65490	AT5G65490	WT-µg-LD	WT-1g-LD	327.011	115.127	1.50611	0.0265405
258399_at	IAA19 (INDOLE-3-ACETIC ACID INDUCIBLE 19); transcription factor	IAA19	AT3G15540	WT-µg-LD	WT-1g-LD	249.618	87.9058	1.50569	0.00880784
247990_at	glucosidase II beta subunit protein PSL4	PSL4	AT5G56360	WT-µg-LD	WT-1g-LD	879.59	309.827	1.50537	0.00451694
260626_at	hypothetical protein	AT1G08040	AT1G08040	WT-µg-LD	WT-1g-LD	336.077	118.452	1.5045	0.00209806
260309_at	AOAT2 (ALANINE-2-OXOGLUTARATE AMINOTRANSFERASE 2); L-alanine:2-oxoglutarate aminotransferase/ glycine:2-oxoglutarate aminotransferase	AOAT2	AT1G70580	WT-µg-LD	WT-1g-LD	481.053	169.629	1.50381	0.0120641
252682_at	membrane insertion protein and OxaA/YidC with tetratricopeptide repeat domain-containing protein	AT3G44370	AT3G44370	WT-µg-LD	WT-1g-LD	172.377	60.8041	1.50333	0.00972179
252277_at	NACA2 (NASCENT POLYPEPTIDE-ASSOCIATED COMPLEX SUBUNIT ALPHA-LIKE PROTEIN 2)	NACA2	AT3G49470	WT-µg-LD	WT-1g-LD	1300.66	459.266	1.50184	0.0503226
250560_at	RPA70B (RPA70-KDA SUBUNIT B); DNA binding / nucleic acid binding	RPA70B	AT5G08020	WT-µg-LD	WT-1g-LD	80.8077	28.5351	1.50175	0.00536567
257607_at	pentatricopeptide repeat-containing protein	AT3G13880	AT3G13880	WT-µg-LD	WT-1g-LD	57.4559	20.3053	1.5006	0.0232538
246908_at	RD22; nutrient reservoir	RD22	AT5G25610	WT-µg-LD	WT-1g-LD	491.059	173.588	1.50023	0.0128222
253438_at	SHM3 (SERINE HYDROXYMETHYLTRANSFERASE 3); catalytic/ glycine hydroxymethyltransferase/ pyridoxal phosphate binding	SHM3	AT4G32520	WT-µg-LD	WT-1g-LD	1059.02	374.428	1.49996	0.0092133
253804_at	hypothetical protein	AT4G28230	AT4G28230	WT-µg-LD	WT-1g-LD	559.758	197.915	1.49993	0.00332126
258587_at	hypothetical protein	AT3G04310	AT3G04310	WT-µg-LD	WT-1g-LD	155.174	54.8735	1.49971	0.0305027
257838_at	pentatricopeptide repeat-containing protein	AT3G25210	AT3G25210	WT-µg-LD	WT-1g-LD	134.348	47.5114	1.49963	0.00859719
259959_at	CYP59 (CYCLOPHILIN 59); RNA binding / nucleic acid binding / peptidyl-prolyl cis-trans isomerase	CYP59	AT1G53720	WT-µg-LD	WT-1g-LD	167.857	59.4015	1.49867	0.00188452
261223_at	HVA22H (HVA22-LIKE PROTEIN H (ATHVA22H))	HVA22H	AT1G19950	WT-µg-LD	WT-1g-LD	72.4663	25.6651	1.4975	0.0141743
264668_at	2,3-bisphosphoglycerate-independent phosphoglycerate mutase 1	AT1G09780	AT1G09780	WT-µg-LD	WT-1g-LD	3793.36	1344.14	1.49679	0.0107846
266411_at	cyclophilin-like peptidyl-prolyl cis-trans isomerase family protein	AT2G38730	AT2G38730	WT-µg-LD	WT-1g-LD	170.464	60.4073	1.49667	0.0292385
258264_at	MBD11; DNA binding / methyl-CpG binding	MBD11	AT3G15790	WT-µg-LD	WT-1g-LD	318.517	112.896	1.49637	0.00121474
259943_at	nuclear transport factor 2 (NTF2) family protein	AT1G71480	AT1G71480	WT-µg-LD	WT-1g-LD	793.692	281.35	1.49621	0.00242908
258922_at	40S ribosomal protein S17-3	AT3G10610	AT3G10610	WT-µg-LD	WT-1g-LD	1333.98	473.022	1.49576	0.00293158
253391_at	2Fe-2S iron-sulfur cluster binding domain-containing protein	AT4G32590	AT4G32590	WT-µg-LD	WT-1g-LD	608.507	215.809	1.49552	0.0128771
246699_at	pre-rRNA-processing protein TSR2, conserved region-containing protein	AT5G27990	AT5G27990	WT-µg-LD	WT-1g-LD	806.867	286.355	1.49453	0.00300193
260252_at	mitochondrial substrate carrier family protein	AT1G74240	AT1G74240	WT-µg-LD	WT-1g-LD	179.758	63.8041	1.49433	0.0165721
264879_at	hypothetical protein	AT1G61260	AT1G61260	WT-µg-LD	WT-1g-LD	361.26	128.242	1.49417	0.00788156
254280_at	SMO1-2 (STEROL C4-METHYL OXIDASE 1-2); 4,4-dimethyl-9beta,19-cyclopropylsterol-4alpha-methyl oxidase/ C-4 methylsterol oxidase/ catalytic	SMO1-2	AT4G22756	WT-µg-LD	WT-1g-LD	151.16	53.6673	1.49396	0.0494951
247261_at	phosphoglycerate mutase-like protein	AT5G64460	AT5G64460	WT-µg-LD	WT-1g-LD	998.984	354.736	1.49372	0.0514438
262501_at	emb1968 (embryo defective 1968); ATP binding / ATPase/ DNA binding / DNA clamp loader/ nucleoside-triphosphatase/ nucleotide binding	emb1968	AT1G21690	WT-µg-LD	WT-1g-LD	479.772	170.409	1.49334	0.0416137
245383_at	C2H2 and C2HC zinc finger-containing protein	AT4G17810	AT4G17810	WT-µg-LD	WT-1g-LD	143.475	51.0379	1.49116	0.00557651
249916_at	HTB2; DNA binding	HTB2	AT5G22880	WT-µg-LD	WT-1g-LD	223.038	79.3435	1.4911	0.0020852
258861_at	putative DEAD/DEAH box helicase	AT3G02060	AT3G02060	WT-µg-LD	WT-1g-LD	266.013	94.6487	1.49084	0.0341458
257756_at	uridylate kinase-like protein	AT3G18680	AT3G18680	WT-µg-LD	WT-1g-LD	967.495	344.255	1.49078	0.0392923
261194_at	EMB1586 (embryo defective 1586); ATP binding / ATP-dependent helicase/ helicase/ nucleic acid binding	EMB1586	AT1G12775	WT-µg-LD	WT-1g-LD	75.4758	26.8732	1.48985	0.0291876
258033_at	ATMRP6; ATPase, coupled to transmembrane movement of substances	MRP6	AT3G21250	WT-µg-LD	WT-1g-LD	1014.3	361.552	1.48821	0.0211251
249063_at	POP1; transporter	POP1	AT5G44110	WT-µg-LD	WT-1g-LD	280.952	100.149	1.48818	0.0318438
245265_at	ACD6 (ACCELERATED CELL DEATH 6); protein binding	ACD6	AT4G14400	WT-µg-LD	WT-1g-LD	6436.72	2295.4	1.48758	0.00546501
256505_at	tRNA wybutosine-synthesizing protein 1-like protein	AT1G75200	AT1G75200	WT-µg-LD	WT-1g-LD	612.139	218.301	1.48754	0.0518669
258816_at	TCP-1/cpn60 chaperonin family protein	AT3G03960	AT3G03960	WT-µg-LD	WT-1g-LD	1260.09	449.493	1.48716	0.00755445
250566_at	TCP17 (TCP DOMAIN PROTEIN 17); transcription factor	TCP17	AT5G08070	WT-µg-LD	WT-1g-LD	162.244	57.8756	1.48714	0.023272
265336_at	anaphase-promoting complex, subunit 10 family / APC10 family	APC10	AT2G18290	WT-µg-LD	WT-1g-LD	519.473	185.478	1.4858	0.00166682
259132_at	O-fucosyltransferase-like protein	AT3G02250	AT3G02250	WT-µg-LD	WT-1g-LD	203.479	72.6526	1.4858	0.0372857
261410_at	MT1C; copper ion binding	MT1C	AT1G07610	WT-µg-LD	WT-1g-LD	4590.79	1639.44	1.48554	0.00475696
260062_at	pentatricopeptide repeat-containing protein	AT1G73710	AT1G73710	WT-µg-LD	WT-1g-LD	161.093	57.576	1.48435	0.00705522
256065_at	60S ribosomal protein L35a-1	AT1G07070	AT1G07070	WT-µg-LD	WT-1g-LD	461.677	165.045	1.48402	0.00158813
247148_at	IAA9 (INDOLE-3-ACETIC ACID INDUCIBLE 9); transcription factor	IAA9	AT5G65670	WT-µg-LD	WT-1g-LD	1787.6	639.072	1.48398	0.0127632
260072_at	hypothetical protein	AT1G73650	AT1G73650	WT-µg-LD	WT-1g-LD	2604.67	931.538	1.48341	0.00345315
266396_at	hypothetical protein	AT2G38790	AT2G38790	WT-µg-LD	WT-1g-LD	2576.74	922.472	1.48197	0.0218583
254994_at	MTA (MRNA ADENOSINE METHYLASE); S-adenosylmethionine-dependent methyltransferase/ methyltransferase	MTA	AT4G10760	WT-µg-LD	WT-1g-LD	431.284	154.449	1.48151	0.00298721
264673_at	ATATP-PRT2 (ATP PHOSPHORIBOSYL TRANSFERASE 2); ATP phosphoribosyltransferase	ATATP-PRT2	AT1G09795	WT-µg-LD	WT-1g-LD	684.038	245.143	1.48045	0.00782592
247746_at	ATUCP2 (UNCOUPLING PROTEIN 2); oxidative phosphorylation uncoupler	ATUCP2	AT5G58970	WT-µg-LD	WT-1g-LD	306.877	109.988	1.48031	0.0089258
246152_at	ATIPT9; ATP binding / tRNA isopentenyltransferase	IPT9	AT5G20040	WT-µg-LD	WT-1g-LD	195.321	70.0115	1.48018	0.0221809
259942_at	ATWHY2 (A. THALIANA WHIRLY 2); DNA binding	ATWHY2	AT1G71260	WT-µg-LD	WT-1g-LD	495.578	177.815	1.47874	0.00483019
254981_at	Nascent polypeptide-associated complex subunit alpha-like protein 4	AT4G10480	AT4G10480	WT-µg-LD	WT-1g-LD	3123.07	1121.09	1.47807	0.0257415
248797_at	Hyaluronan / mRNA binding family protein	AT5G47210	AT5G47210	WT-µg-LD	WT-1g-LD	3361.87	1207.27	1.47751	0.00334729
264803_at	hypothetical protein	AT1G08580	AT1G08580	WT-µg-LD	WT-1g-LD	610.549	219.418	1.47643	0.0010325
258475_at	emb2768 (EMBRYO DEFECTIVE 2768); ATP binding / RNA binding / aminoacyl-tRNA ligase/ nucleotide binding / tyrosine-tRNA ligase	emb2768	AT3G02660	WT-µg-LD	WT-1g-LD	170.713	61.3535	1.47635	0.00224059
257794_at	hypothetical protein	AT3G27050	AT3G27050	WT-µg-LD	WT-1g-LD	1171.29	421.36	1.47498	0.0132768
260570_at	SSI2; acyl-[acyl-carrier-protein] desaturase/ stearoyl-CoA 9-desaturase	SSI2	AT2G43710	WT-µg-LD	WT-1g-LD	2653.9	954.733	1.47494	0.00889749
253491_at	RNA Lariat debranching enzyme	DBR1	AT4G31770	WT-µg-LD	WT-1g-LD	208.568	75.035	1.47488	0.00347983
250252_at	ZIFL1 (ZINC INDUCED FACILITATOR-like 1); tetracycline:hydrogen antiporter	ZIFL1	AT5G13750	WT-µg-LD	WT-1g-LD	736.661	265.159	1.47414	0.0120111
263946_at	mitochondrial transcription termination factor family protein	AT2G36000	AT2G36000	WT-µg-LD	WT-1g-LD	398.218	143.38	1.47372	0.032389
247247_at	large subunit ribosomal protein L17	AT5G64650	AT5G64650	WT-µg-LD	WT-1g-LD	246.552	88.8158	1.47301	0.00286093
263251_at	hypothetical protein	AT2G31410	AT2G31410	WT-µg-LD	WT-1g-LD	1195.83	431.166	1.4717	0.0014137
255225_at	WD40-repeats containing protein YAOZHE	YAO	AT4G05410	WT-µg-LD	WT-1g-LD	345.258	124.493	1.47161	0.0207629
264084_at	tetratricopeptide repeat-containing protein	AT2G31240	AT2G31240	WT-µg-LD	WT-1g-LD	316.928	114.314	1.47115	0.00876537
247878_at	hypothetical protein	AT5G57760	AT5G57760	WT-µg-LD	WT-1g-LD	153.197	55.2631	1.471	0.00456605
260082_at	mitochondrial substrate carrier family protein	AT1G78180	AT1G78180	WT-µg-LD	WT-1g-LD	195.52	70.5377	1.47085	0.032377
253139_at	AKR2 (ANKYRIN REPEAT-CONTAINING PROTEIN 2); protein binding	AKR2	AT4G35450	WT-µg-LD	WT-1g-LD	3979.79	1436.22	1.47042	0.00407936
254012_at	60S ribosomal protein L31-2	AT4G26230	AT4G26230	WT-µg-LD	WT-1g-LD	4569.16	1649.34	1.47004	0.00328716
259762_at	ARM repeat superfamily protein	AT1G77600	AT1G77600	WT-µg-LD	WT-1g-LD	116.018	41.9135	1.46886	0.0312888
247815_at	40S ribosomal protein S4-3	AT5G58420	AT5G58420	WT-µg-LD	WT-1g-LD	3764.95	1360.17	1.46885	0.0037424
264239_at	Fcf2 pre-rRNA processing protein	AT1G54770	AT1G54770	WT-µg-LD	WT-1g-LD	440.949	159.36	1.46832	0.0129919
249874_at	Thymidine kinase	AT5G23070	AT5G23070	WT-µg-LD	WT-1g-LD	259.472	93.8207	1.4676	0.016281
259430_at	GPAT4 (GLYCEROL-3-PHOSPHATE ACYLTRANSFERASE 4); 1-acylglycerol-3-phosphate O-acyltransferase/ acyltransferase	GPAT4	AT1G01610	WT-µg-LD	WT-1g-LD	250.349	90.5287	1.46749	0.0135085
251737_at	40S ribosomal protein S26-3	AT3G56340	AT3G56340	WT-µg-LD	WT-1g-LD	5416.37	1959.36	1.46695	0.00224325
245318_at	arabinogalactan family protein	AT4G16980	AT4G16980	WT-µg-LD	WT-1g-LD	3000.65	1085.55	1.46684	0.00888634
255435_at	PETC (PHOTOSYNTHETIC ELECTRON TRANSFER C); electron transporter, transferring electrons from cytochrome b6/f complex of photosystem II	PETC	AT4G03280	WT-µg-LD	WT-1g-LD	15457.7	5594.06	1.46636	0.00952771
264989_at	hypothetical protein	AT1G27200	AT1G27200	WT-µg-LD	WT-1g-LD	520.1	188.426	1.46479	0.00492873
251993_at	peroxiredoxin-2E	AT3G52960	AT3G52960	WT-µg-LD	WT-1g-LD	1324.78	479.983	1.4647	0.0108928
253824_at	mitochondrial substrate carrier family protein	MTM1	AT4G27940	WT-µg-LD	WT-1g-LD	369.854	134.053	1.46415	0.0154082
257461_at	ATPUP15; purine transmembrane transporter	ATPUP15	AT1G75470	WT-µg-LD	WT-1g-LD	198.102	71.8091	1.464	0.00682985
265965_at	arginine biosynthesis bifunctional protein ArgJ	AT2G37500	AT2G37500	WT-µg-LD	WT-1g-LD	214.421	77.7837	1.46291	0.0428019
264114_at	CDT1A (ARABIDOPSIS HOMOLOG OF YEAST CDT1 A); cyclin-dependent protein kinase/ protein binding	CDT1A	AT2G31270	WT-µg-LD	WT-1g-LD	135.848	49.2847	1.46278	0.0152115
259344_at	RIF10 (resistant to inhibition with FSM 10); 3'-5'-exoribonuclease/ RNA binding / nucleic acid binding / polyribonucleotide nucleotidyltransferase	RIF10	AT3G03710	WT-µg-LD	WT-1g-LD	344.824	125.131	1.46243	0.0240038
247942_at	hypothetical protein	AT5G57120	AT5G57120	WT-µg-LD	WT-1g-LD	837.955	304.467	1.46059	0.00110041
264845_at	ATHM1; enzyme activator	ATHM1	AT1G03680	WT-µg-LD	WT-1g-LD	4173.59	1516.63	1.46042	0.0217616
246485_at	AtCXE17 (Arabidopsis thaliana carboxyesterase 17); hydrolase	AtCXE17	AT5G16080	WT-µg-LD	WT-1g-LD	199.177	72.3848	1.46029	0.00742298
258482_at	TCP-1/cpn60 chaperonin family protein	AT3G02530	AT3G02530	WT-µg-LD	WT-1g-LD	1635.29	594.395	1.46005	0.00775167
265027_at	NFD2 (NUCLEAR FUSION DEFECTIVE 2); RNA binding / ribonuclease III	NFD2	AT1G24450	WT-µg-LD	WT-1g-LD	467.163	169.819	1.45993	0.00128919
252032_at	RNA recognition motif-containing protein	AT3G52150	AT3G52150	WT-µg-LD	WT-1g-LD	1436.12	522.213	1.45947	0.00431202
260288_at	Major facilitator superfamily protein	AT1G80530	AT1G80530	WT-µg-LD	WT-1g-LD	866.356	315.044	1.4594	0.00235051
248273_at	transducin/WD40 domain-containing protein	AT5G53500	AT5G53500	WT-µg-LD	WT-1g-LD	106.2	38.6232	1.45925	0.0178731
256112_at	ATRABA1B (ARABIDOPSIS RAB GTPASE HOMOLOG A1B); GTP binding	ATRABA1B	AT1G16920	WT-µg-LD	WT-1g-LD	628.976	228.768	1.45912	0.032655
255043_at	hypothetical protein	AT4G09640	AT4G09640	WT-µg-LD	WT-1g-LD	327.255	119.056	1.45877	0.00552209
247150_at	hypothetical protein	AT5G65650	AT5G65650	WT-µg-LD	WT-1g-LD	490.424	178.428	1.45869	0.0426359
253274_at	EDA9 (embryo sac development arrest 9); ATP binding	EDA9	AT4G34200	WT-µg-LD	WT-1g-LD	1981.04	720.91	1.45837	0.0474188
253589_at	pentatricopeptide repeat-containing protein	AT4G30825	AT4G30825	WT-µg-LD	WT-1g-LD	135.895	49.4703	1.45785	0.00499082
253335_at	putative protein phosphatase 2C 62	AT4G33500	AT4G33500	WT-µg-LD	WT-1g-LD	494.061	179.939	1.45718	0.00672092
260902_at	phosphoenolpyruvate carboxylase family protein	AT1G21440	AT1G21440	WT-µg-LD	WT-1g-LD	374.984	136.762	1.45516	0.0488038
263126_at	SOUL heme-binding protein	AT1G78460	AT1G78460	WT-µg-LD	WT-1g-LD	6553.4	2390.36	1.45502	0.00453447
258152_at	TCP-1/cpn60 chaperonin family protein	AT3G18190	AT3G18190	WT-µg-LD	WT-1g-LD	2431.42	887.57	1.45387	0.0294284
253773_s_at	ribosomal protein L22p/L17e family protein /// ribosomal protein L22p/L17e family protein	AT1G52370 /// AT4G28360	AT1G52370 /// AT4G28360	WT-µg-LD	WT-1g-LD	853.856	311.741	1.45365	0.0100909
257714_at	histone H3 /// histone H3 /// histone H3 /// histone H3 /// histone H3.1	AT1G09200 /// AT3G27360 /// AT5G10390 /// AT5G10400 /// AT5G65360	AT3G27360	WT-µg-LD	WT-1g-LD	157.192	57.399	1.45343	0.0162132
255041_at	mitochondrial transcription termination factor family protein	AT4G09620	AT4G09620	WT-µg-LD	WT-1g-LD	935.766	341.988	1.4522	0.00449361
260412_at	AMY3 (ALPHA-AMYLASE-LIKE 3); alpha-amylase	AMY3	AT1G69830	WT-µg-LD	WT-1g-LD	302.779	110.785	1.4505	0.00794233
245291_at	dihydrolipoyl dehydrogenase	AT4G16155	AT4G16155	WT-µg-LD	WT-1g-LD	357.642	130.9	1.45005	0.0306023
256145_at	bifunctional inhibitor/lipid-transfer protein/seed storage 2S albumin-like protein	AT1G48750	AT1G48750	WT-µg-LD	WT-1g-LD	433.369	158.619	1.45004	0.0225209
263774_at	putative methyltransferase PMT23	AT2G40280	AT2G40280	WT-µg-LD	WT-1g-LD	486.936	178.235	1.44995	0.0547345
253429_at	cyclophilin-like peptidyl-prolyl cis-trans isomerase family protein	AT4G32420	AT4G32420	WT-µg-LD	WT-1g-LD	353.985	129.736	1.44811	0.00922884
260099_at	eukaryotic translation initiation factor eIF2A-like protein	AT1G73180	AT1G73180	WT-µg-LD	WT-1g-LD	378.396	138.81	1.44679	0.0140638
253465_at	putative beta-1,3-galactosyltransferase 10	AT4G32120	AT4G32120	WT-µg-LD	WT-1g-LD	560.977	205.828	1.4465	0.0109239
257463_at	Sec14p-like phosphatidylinositol transfer family protein	AT1G14820	AT1G14820	WT-µg-LD	WT-1g-LD	627.453	230.39	1.44543	0.0432297
250584_at	WD40 domain-containing protein	AT5G07590	AT5G07590	WT-µg-LD	WT-1g-LD	122.974	45.1992	1.44399	0.0332276
250475_at	AST68; sulfate transmembrane transporter	SULTR2;1	AT5G10180	WT-µg-LD	WT-1g-LD	798.647	293.632	1.44355	0.0128875
257125_at	ATTCP-1; ATP binding / protein binding / unfolded protein binding	ATTCP-1	AT3G20050	WT-µg-LD	WT-1g-LD	1909.12	702.099	1.44316	0.00989321
251024_at	transmembrane amino acid transporter family protein	AT5G02180	AT5G02180	WT-µg-LD	WT-1g-LD	210.59	77.5005	1.44216	0.0438837
245293_at	heat shock protein 70	AT4G16660	AT4G16660	WT-µg-LD	WT-1g-LD	2243.27	825.963	1.44146	0.00775042
251038_at	ABA modulated tyrosine-phosphorylated protein	AT5G02240	AT5G02240	WT-µg-LD	WT-1g-LD	3858.64	1422.47	1.4397	0.011263
266395_at	isopropylmalate isomerase 2	IPMI2	AT2G43100	WT-µg-LD	WT-1g-LD	219.141	80.8089	1.43927	0.0272128
253703_at	ORC5 (ORIGIN RECOGNITION COMPLEX PROTEIN 5); protein binding	ORC5	AT4G29910	WT-µg-LD	WT-1g-LD	227.045	83.7494	1.43883	0.00650441
251396_at	transketolase	AT3G60750	AT3G60750	WT-µg-LD	WT-1g-LD	9659.4	3564.6	1.43819	0.00938125
260322_at	RING-type ubiquitin E3 ligase	AT1G63900	AT1G63900	WT-µg-LD	WT-1g-LD	776.181	286.576	1.43748	0.00384139
254502_at	PTAC14 (PLASTID TRANSCRIPTIONALLY ACTIVE14)	PTAC14	AT4G20130	WT-µg-LD	WT-1g-LD	222.513	82.1772	1.43708	0.012398
254448_at	FAH2 (FATTY ACID HYDROXYLASE 2); catalytic/ fatty acid alpha-hydroxylase	FAH2	AT4G20870	WT-µg-LD	WT-1g-LD	391.382	144.59	1.43661	0.0541102
260128_at	S-adenosylmethionine-dependent methyltransferase domain-containing protein	AT1G36310	AT1G36310	WT-µg-LD	WT-1g-LD	1210.32	447.212	1.43636	0.0048851
252946_at	hypothetical protein	AT4G39235	AT4G39235	WT-µg-LD	WT-1g-LD	95.4771	35.3235	1.43453	0.0169083
266905_at	nucleoside triphosphatase CCP1	AT2G34560	AT2G34560	WT-µg-LD	WT-1g-LD	147.7	54.6502	1.43437	0.0261965
257857_s_at	RRP45a (Ribonuclease PH45a); 3'-5'-exoribonuclease/ RNA binding	RRP45a	AT3G12990 /// AT3G60500	WT-µg-LD	WT-1g-LD	484.51	179.283	1.43429	0.00623196
251995_at	FK (FACKEL); delta14-sterol reductase	FK	AT3G52940	WT-µg-LD	WT-1g-LD	121.57	45.0058	1.4336	0.00478838
250867_at	thioredoxin family protein	AT5G03880	AT5G03880	WT-µg-LD	WT-1g-LD	2910.75	1077.6	1.43357	0.0074497
250973_at	60S ribosomal protein L4-2	AT5G02870	AT5G02870	WT-µg-LD	WT-1g-LD	7182.94	2659.42	1.43346	0.00339163
246800_at	SHM2 (SERINE HYDROXYMETHYLTRANSFERASE 2); catalytic/ glycine hydroxymethyltransferase/ pyridoxal phosphate binding	SHM2	AT5G26780	WT-µg-LD	WT-1g-LD	462.043	171.151	1.43276	0.0147523
260390_at	hypothetical protein	AT1G73940	AT1G73940	WT-µg-LD	WT-1g-LD	504.449	186.978	1.43184	0.00247033
262003_at	Protein kinase superfamily protein	AT1G64460	AT1G64460	WT-µg-LD	WT-1g-LD	754.397	279.892	1.43045	0.004199
251810_at	hypothetical protein	AT3G55250	AT3G55250	WT-µg-LD	WT-1g-LD	1449.65	538.029	1.42995	0.0390655
257759_at	CRM family member 3A	CFM3A	AT3G23070	WT-µg-LD	WT-1g-LD	195.487	72.5782	1.42946	0.0413132
247689_at	Protein-tyrosine phosphatase-like, PTPLA	AT5G59770	AT5G59770	WT-µg-LD	WT-1g-LD	521.923	193.894	1.42857	0.0155522
253027_at	pentatricopeptide repeat-containing protein	AT4G38150	AT4G38150	WT-µg-LD	WT-1g-LD	639.111	237.484	1.42824	0.0538629
259541_at	protein ALTERED SEED GERMINATION 5	AT1G20650	AT1G20650	WT-µg-LD	WT-1g-LD	662.883	246.456	1.42743	0.0111967
245956_s_at	BIP2; ATP binding	BIP2	AT5G28540 /// AT5G42020	WT-µg-LD	WT-1g-LD	12023.2	4470.88	1.42719	0.0183496
264824_at	1-aminocyclopropane-1-carboxylate oxidase-like 5	2A6	AT1G03420	WT-µg-LD	WT-1g-LD	503.582	187.26	1.42718	0.00383303
248664_at	FKBP15-2; FK506 binding / peptidyl-prolyl cis-trans isomerase	FKBP15-2	AT5G48580	WT-µg-LD	WT-1g-LD	1223.81	455.313	1.42644	0.00824732
251282_at	CRF6 (CYTOKININ RESPONSE FACTOR 6); DNA binding / transcription factor	CRF6	AT3G61630	WT-µg-LD	WT-1g-LD	1019.59	379.555	1.4256	0.00753103
251639_at	acetylglutamate kinase	NAGK	AT3G57560	WT-µg-LD	WT-1g-LD	834.972	310.902	1.42527	0.0106185
265120_at	KAS III (3-KETOACYL-ACYL CARRIER PROTEIN SYNTHASE III); 3-oxoacyl-[acyl-carrier-protein] synthase/ catalytic/ transferase, transferring acyl groups other than amino-acyl groups	KAS III	AT1G62640	WT-µg-LD	WT-1g-LD	387.677	144.361	1.42517	0.0264061
257180_at	NOL1/NOP2/sun family protein / antitermination NusB domain-containing protein	AT3G13180	AT3G13180	WT-µg-LD	WT-1g-LD	217.841	81.1346	1.42489	0.0127409
266102_at	pentatricopeptide repeat-containing protein	AT2G40720	AT2G40720	WT-µg-LD	WT-1g-LD	42.7569	15.9251	1.42485	0.0258097
267337_at	HXXXD-type acyl-transferase-like protein	AT2G39980	AT2G39980	WT-µg-LD	WT-1g-LD	562.572	209.548	1.42475	0.0191774
247606_at	replication protein A 70 kDa DNA-binding subunit D	RPA70D	AT5G61000	WT-µg-LD	WT-1g-LD	119.81	44.647	1.42411	0.0198182
253493_at	ENP (ENHANCER OF PINOID); protein binding / signal transducer	ENP	AT4G31820	WT-µg-LD	WT-1g-LD	455.388	169.716	1.42398	0.0108156
255657_at	60S acidic ribosomal protein P1-2	AT4G00810	AT4G00810	WT-µg-LD	WT-1g-LD	2876.89	1072.22	1.42391	0.00375221
251090_at	mitochondrial substrate carrier family protein	AT5G01340	AT5G01340	WT-µg-LD	WT-1g-LD	724.407	270.023	1.42372	0.00943669
250762_at	mitochondrial glycoprotein family protein	AT5G05990	AT5G05990	WT-µg-LD	WT-1g-LD	206.268	76.897	1.42352	0.0116837
257724_at	hypothetical protein	AT3G18510	AT3G18510	WT-µg-LD	WT-1g-LD	72.8914	27.1804	1.42319	0.0259915
250554_at	mitochondrial transcription termination factor family protein	AT5G07900	AT5G07900	WT-µg-LD	WT-1g-LD	100.559	37.5335	1.42179	0.0366947
264471_at	protein MIDASIN1	AT1G67120	AT1G67120	WT-µg-LD	WT-1g-LD	187.388	69.9669	1.42129	0.00461122
264131_at	nucleolar complex-associated protein domain-containing protein	AT1G79150	AT1G79150	WT-µg-LD	WT-1g-LD	310.448	115.919	1.42124	0.00459686
252904_at	EMB2453 (embryo defective 2453)	EMB2453	AT4G39620	WT-µg-LD	WT-1g-LD	195.077	72.8426	1.42119	0.00641377
256746_at	alpha-glucan phosphorylase 1	AT3G29320	AT3G29320	WT-µg-LD	WT-1g-LD	234.961	87.7486	1.42097	0.0228069
248223_at	hypothetical protein	AT5G53620	AT5G53620	WT-µg-LD	WT-1g-LD	671.767	250.893	1.42089	0.017789
263557_at	BLH7 (bell1-like homeodomain 7); DNA binding / transcription factor	BLH7	AT2G16400	WT-µg-LD	WT-1g-LD	590.746	220.669	1.42065	0.0438451
254809_at	SAUR-like auxin-responsive protein	AT4G12410	AT4G12410	WT-µg-LD	WT-1g-LD	212.618	79.4364	1.42039	0.00434828
251503_at	ATMRP14; ATPase, coupled to transmembrane movement of substances	ATMRP14	AT3G59140	WT-µg-LD	WT-1g-LD	223.743	83.6332	1.41969	0.00797649
261417_at	thioredoxin family protein	AT1G07700	AT1G07700	WT-µg-LD	WT-1g-LD	2467.42	922.359	1.41961	0.0208362
252662_at	CEF (clone eighty-four); protein binding / transporter/ zinc ion binding	CEF	AT3G44340	WT-µg-LD	WT-1g-LD	1233.37	461.077	1.41953	0.0461015
265327_at	hypothetical protein	AT2G18210	AT2G18210	WT-µg-LD	WT-1g-LD	184.972	69.1517	1.41947	0.0308059
257627_at	CYP71B25; electron carrier/ heme binding / iron ion binding / monooxygenase/ oxygen binding	CYP71B25	AT3G26270	WT-µg-LD	WT-1g-LD	68.3421	25.5576	1.41902	0.0234776
249964_at	MPK16; MAP kinase	MPK16	AT5G19010	WT-µg-LD	WT-1g-LD	758.295	283.59	1.41895	0.0172666
253919_at	hypothetical protein	AT4G27350	AT4G27350	WT-µg-LD	WT-1g-LD	661.628	247.536	1.41838	0.0120812
266831_at	SQE2 (squalene epoxidase 2); FAD binding / oxidoreductase/ squalene monooxygenase	SQE2	AT2G22830	WT-µg-LD	WT-1g-LD	103.115	38.5908	1.41792	0.00600581
251969_at	LUT1 (LUTEIN DEFICIENT 1); epsilon hydroxylase/ oxygen binding	LUT1	AT3G53130	WT-µg-LD	WT-1g-LD	815.539	305.224	1.41788	0.00623002
266767_at	putative plastid-lipid-associated protein 10	AT2G46910	AT2G46910	WT-µg-LD	WT-1g-LD	821.426	307.445	1.4178	0.00962521
253357_at	vacuolar import/degradation, Vid27-related protein	AT4G33400	AT4G33400	WT-µg-LD	WT-1g-LD	123.487	46.2273	1.41754	0.0300738
264849_at	40S ribosomal protein S4-1	AT2G17360	AT2G17360	WT-µg-LD	WT-1g-LD	3193.71	1195.6	1.4175	5.71008e-05
261230_at	TUB5; structural constituent of cytoskeleton	TUB5	AT1G20010	WT-µg-LD	WT-1g-LD	238.07	89.1453	1.41716	0.00906329
250137_at	tRNA/rRNA methyltransferase (SpoU) family protein	AT5G15390	AT5G15390	WT-µg-LD	WT-1g-LD	309.126	115.814	1.41639	0.0426098
260481_at	ATFD1 (FERREDOXIN 1); 2 iron, 2 sulfur cluster binding / electron carrier/ iron-sulfur cluster binding	ATFD1	AT1G10960	WT-µg-LD	WT-1g-LD	3051.92	1144.33	1.41521	0.00414551
267483_at	UTR1 (UDP-GALACTOSE TRANSPORTER 1); UDP-galactose transmembrane transporter/ UDP-glucose transmembrane transporter/ pyrimidine nucleotide sugar transmembrane transporter	UTR1	AT2G02810	WT-µg-LD	WT-1g-LD	1938.56	727.213	1.41453	0.00177913
249604_x_at	RING/U-box domain-containing protein	AT5G37230	AT5G37230	WT-µg-LD	WT-1g-LD	71.5236	26.8341	1.41435	0.0301533
252287_at	ribosomal protein S5 domain 2-like superfamily protein	AT3G49080	AT3G49080	WT-µg-LD	WT-1g-LD	553.61	207.747	1.41404	0.00763155
261552_at	putative LRR receptor-like serine/threonine-protein kinase	AT1G63430	AT1G63430	WT-µg-LD	WT-1g-LD	239.857	90.0132	1.41396	0.0132123
258634_at	RNA recognition motif-containing protein	AT3G08000	AT3G08000	WT-µg-LD	WT-1g-LD	91.1316	34.2061	1.4137	0.025598
254126_at	RBP31 (31-KDA RNA BINDING PROTEIN); RNA binding / poly(U) binding	RBP31	AT4G24770	WT-µg-LD	WT-1g-LD	2665.47	1000.55	1.4136	0.00131561
259830_at	RNI-like superfamily protein	AT1G80630	AT1G80630	WT-µg-LD	WT-1g-LD	226.946	85.1956	1.4135	0.0117682
265707_at	uvrB/uvrC motif-containing protein	AT2G03390	AT2G03390	WT-µg-LD	WT-1g-LD	1883.1	706.992	1.41334	0.00259231
245145_at	DHDPS2 (DIHYDRODIPICOLINATE SYNTHASE); catalytic/ dihydrodipicolinate synthase/ lyase	DHDPS2	AT2G45440	WT-µg-LD	WT-1g-LD	1018.34	382.394	1.41308	0.0100582
257909_at	Rhodanese/Cell cycle control phosphatase superfamily protein	AT3G25480	AT3G25480	WT-µg-LD	WT-1g-LD	299.324	112.399	1.41307	0.00469996
247286_at	DiT2.2 (dicarboxylate transporter 2.2); oxoglutarate:malate antiporter	DiT2.2	AT5G64280	WT-µg-LD	WT-1g-LD	799.635	300.368	1.41261	0.00113125
248679_at	hypothetical protein	AT5G48830	AT5G48830	WT-µg-LD	WT-1g-LD	395.362	148.78	1.40999	0.0354888
259278_at	hypothetical protein	AT3G01160	AT3G01160	WT-µg-LD	WT-1g-LD	322.53	121.386	1.40983	0.00769987
254732_at	nuclear factor NO VEIN	NOV	AT4G13750	WT-µg-LD	WT-1g-LD	178.396	67.1426	1.40979	0.00542936
254715_at	putative triglyceride lipase	AT4G13550	AT4G13550	WT-µg-LD	WT-1g-LD	332.408	125.143	1.40938	0.00605543
260645_at	TTL1 (TETRATRICOPETIDE-REPEAT THIOREDOXIN-LIKE 1); binding	TTL1	AT1G53300	WT-µg-LD	WT-1g-LD	215.8	81.2932	1.40849	0.02234
265736_at	60S ribosomal protein L7-2	AT2G01250	AT2G01250	WT-µg-LD	WT-1g-LD	8340.15	3142.44	1.40819	0.0383553
253456_at	neurochondrin family protein	AT4G32050	AT4G32050	WT-µg-LD	WT-1g-LD	163.111	61.4818	1.40762	0.0092228
265193_at	hypothetical protein	AT1G05070	AT1G05070	WT-µg-LD	WT-1g-LD	487.907	184.036	1.40662	0.0101135
260000_at	ATMAP70-1 (microtubule-associated proteins 70-1); microtubule binding	ATMAP70-1	AT1G68060	WT-µg-LD	WT-1g-LD	194.658	73.4382	1.40634	0.0020929
250305_at	Rho GTPase activation protein with PH domain	AT5G12150	AT5G12150	WT-µg-LD	WT-1g-LD	977.307	368.851	1.40577	0.00565081
248481_at	Histone superfamily protein	AT5G50930	AT5G50930	WT-µg-LD	WT-1g-LD	92.7589	35.016	1.40547	0.0507013
247791_at	ROC7; peptidyl-prolyl cis-trans isomerase	ROC7	AT5G58710	WT-µg-LD	WT-1g-LD	4201.83	1587.95	1.40386	0.0179684
265840_at	trichome birefringence-like 13 protein	TBL13	AT2G14530	WT-µg-LD	WT-1g-LD	196.772	74.3816	1.40351	0.00181618
248773_at	FRA1 (FRAGILE FIBER 1); microtubule motor	FRA1	AT5G47820	WT-µg-LD	WT-1g-LD	239.836	90.6721	1.40332	0.0214152
263835_at	Eukaryotic translation initiation factor 2 subunit 1	AT2G40290	AT2G40290	WT-µg-LD	WT-1g-LD	1538.76	581.967	1.40276	0.0425968
265716_at	hypothetical protein	AT2G03350	AT2G03350	WT-µg-LD	WT-1g-LD	286.704	108.454	1.40248	0.0493092
266518_at	histone H3 K4-specific methyltransferase SET7/9-like protein	AT2G35170	AT2G35170	WT-µg-LD	WT-1g-LD	307.539	116.379	1.40194	0.0112843
250275_at	hypothetical protein	AT5G13030	AT5G13030	WT-µg-LD	WT-1g-LD	1240.33	469.517	1.40147	0.0122835
262066_at	RAD3-like DNA-binding helicase protein	AT1G79950	AT1G79950	WT-µg-LD	WT-1g-LD	614.402	232.589	1.4014	0.0293781
246434_at	RCP1 (ROOT CAP 1); maltose transmembrane transporter	RCP1	AT5G17520	WT-µg-LD	WT-1g-LD	356.476	135.034	1.40048	0.0339369
267095_at	FAC1 (EMBRYONIC FACTOR1); AMP deaminase	FAC1	AT2G38280	WT-µg-LD	WT-1g-LD	834.702	316.274	1.40009	0.000347699
251442_at	Nucleic acid-binding, OB-fold-like protein	AT3G59980	AT3G59980	WT-µg-LD	WT-1g-LD	666.015	252.478	1.3994	0.0223706
247228_at	probable trehalose-phosphate phosphatase J	AT5G65140	AT5G65140	WT-µg-LD	WT-1g-LD	215.83	81.8276	1.39924	0.0377892
259914_at	NAD(P)-binding Rossmann-fold superfamily protein	AT1G72640	AT1G72640	WT-µg-LD	WT-1g-LD	168.062	63.7173	1.39923	0.0175303
264806_at	pentatricopeptide repeat-containing protein	AT1G08610	AT1G08610	WT-µg-LD	WT-1g-LD	169.594	64.3425	1.39824	0.00934349
254424_at	F-box stress induced protein 2	AT4G21510	AT4G21510	WT-µg-LD	WT-1g-LD	274.477	104.154	1.39797	0.00997893
260629_at	O-fucosyltransferase family protein	AT1G62330	AT1G62330	WT-µg-LD	WT-1g-LD	220.208	83.6135	1.39706	0.0124112
248473_at	TIM8; P-P-bond-hydrolysis-driven protein transmembrane transporter	TIM8	AT5G50810	WT-µg-LD	WT-1g-LD	1319.96	501.361	1.39658	0.00524132
255977_at	40S ribosomal protein S18 /// 40S ribosomal protein S18 /// 40S ribosomal protein S18	AT1G34030 /// PFL /// RPS18C	AT1G34030	WT-µg-LD	WT-1g-LD	2447.38	929.626	1.39651	0.00284965
253942_at	hypothetical protein	AT4G27010	AT4G27010	WT-µg-LD	WT-1g-LD	130.724	49.6596	1.39638	0.00383933
262221_at	ARC3 (ACCUMULATION AND REPLICATION OF CHLOROPLASTS 3)	ARC3	AT1G75010	WT-µg-LD	WT-1g-LD	196.483	74.6529	1.39613	0.0194175
265939_at	cysteine/histidine-rich C1 domain-containing protein	AT2G19650	AT2G19650	WT-µg-LD	WT-1g-LD	577.253	219.388	1.39572	0.0110395
257036_at	PIF / Ping-Pong transposase	AT3G19120	AT3G19120	WT-µg-LD	WT-1g-LD	189.531	72.0565	1.39523	0.0111805
245981_at	hypothetical protein	AT5G13100	AT5G13100	WT-µg-LD	WT-1g-LD	3007.5	1143.89	1.39461	0.0104029
249396_at	DegP9 (DegP protease 9); catalytic/ protein binding / serine-type endopeptidase/ serine-type peptidase	DegP9	AT5G40200	WT-µg-LD	WT-1g-LD	726.63	276.387	1.39453	0.0314536
252376_at	ATGLDH (L-GALACTONO-1,4-LACTONE DEHYDOROGENASE); L-gulono-1,4-lactone dehydrogenase/ galactonolactone dehydrogenase	ATGLDH	AT3G47930	WT-µg-LD	WT-1g-LD	312.963	119.051	1.39442	0.00939221
262936_at	ATCHX2 (CATION/H+ EXCHANGER 2); monovalent cation:proton antiporter/ sodium:hydrogen antiporter	ATCHX2	AT1G79400	WT-µg-LD	WT-1g-LD	141.128	53.7419	1.39288	0.0540761
259239_at	40S ribosomal protein S14-2	AT3G11510	AT3G11510	WT-µg-LD	WT-1g-LD	7216.02	2749.29	1.39214	0.0482238
260670_at	NFD5 (NUCLEAR FUSION DEFECTIVE 5)	NFD5	AT1G19520	WT-µg-LD	WT-1g-LD	197.146	75.1319	1.39177	0.0132653
250212_at	SUVH4 (SU(VAR)3-9 HOMOLOG 4); double-stranded methylated DNA binding / histone methyltransferase(H3-K9 specific) / methyl-CpG binding / methyl-CpNpG binding / methyl-CpNpN binding	SUVH4	AT5G13960	WT-µg-LD	WT-1g-LD	131.834	50.2529	1.39145	0.00200463
256911_at	putative glucosamine-fructose-6-phosphate aminotransferase	AT3G24090	AT3G24090	WT-µg-LD	WT-1g-LD	514.652	196.202	1.39126	0.00831107
253669_at	Dihydropterin pyrophosphokinase / Dihydropteroate synthase	AT4G30000	AT4G30000	WT-µg-LD	WT-1g-LD	73.0637	27.8671	1.39059	0.0364169
258214_at	atToc64-III (Arabidopsis thaliana translocon at the outer membrane of chloroplasts 64-III); binding / carbon-nitrogen ligase, with glutamine as amido-N-donor	atToc64-III	AT3G17970	WT-µg-LD	WT-1g-LD	252.138	96.1745	1.39049	0.0252843
248958_at	ribosomal protein L35	AT5G45590	AT5G45590	WT-µg-LD	WT-1g-LD	257.636	98.2888	1.39023	0.00825823
253761_at	HIT-type zinc finger protein	AT4G28820	AT4G28820	WT-µg-LD	WT-1g-LD	140.254	53.5225	1.38982	0.00158067
249306_at	RING/U-box superfamily protein	AT5G41400	AT5G41400	WT-µg-LD	WT-1g-LD	1211.24	462.446	1.38912	0.0069666
258349_at	HYH (HY5-HOMOLOG); DNA binding / transcription factor	HYH	AT3G17609	WT-µg-LD	WT-1g-LD	892.213	340.652	1.38909	0.0100792
249124_at	CC-NBS-LRR class disease resistance protein	AT5G43740	AT5G43740	WT-µg-LD	WT-1g-LD	744.441	284.263	1.38893	0.017384
267000_at	hypothetical protein	AT2G34310	AT2G34310	WT-µg-LD	WT-1g-LD	841.651	321.534	1.38825	0.00781332
257932_at	HCF107 (HIGH CHLOROPHYLL FLUORESCENT 107); binding	HCF107	AT3G17040	WT-µg-LD	WT-1g-LD	515.629	197.12	1.38726	0.0180971
250031_at	MYR1 (MYb-related protein 1); transcription factor	MYR1	AT5G18240	WT-µg-LD	WT-1g-LD	332.154	126.99	1.38714	0.0168979
250049_at	hydrolase, alpha/beta fold family protein	AT5G17780	AT5G17780	WT-µg-LD	WT-1g-LD	106.519	40.7402	1.38659	0.010525
246768_at	S-adenosyl-L-methionine-dependent methyltransferases superfamily protein	AT5G27400	AT5G27400 /// AT5G27410	WT-µg-LD	WT-1g-LD	387.272	148.13	1.38648	0.00706095
246345_at	CDPK-related kinase 7	AT3G56760	AT3G56760	WT-µg-LD	WT-1g-LD	229.647	87.8809	1.3858	0.0178355
260282_at	EMB2753 (EMBRYO DEFECTIVE 2753); binding	EMB2753	AT1G80410	WT-µg-LD	WT-1g-LD	714.892	273.696	1.38515	0.0358293
252828_at	molecular chaperone Hsp40/DnaJ family protein	AT4G39960	AT4G39960	WT-µg-LD	WT-1g-LD	852.537	326.447	1.38491	0.0204121
254228_at	ribosomal L25/TL5/CTC N-terminal 5S rRNA binding domain-containing protein	AT4G23620	AT4G23620	WT-µg-LD	WT-1g-LD	404.903	155.064	1.38472	0.0400852
250490_at	putative pectinesterase/pectinesterase inhibitor 51	AT5G09760	AT5G09760	WT-µg-LD	WT-1g-LD	228.497	87.5212	1.38447	0.0103207
266051_at	rhodanese-like domain-containing protein	AT2G40760	AT2G40760	WT-µg-LD	WT-1g-LD	303.209	116.167	1.38411	0.00393616
255249_at	Inositol monophosphatase family protein	AT4G05090	AT4G05090	WT-µg-LD	WT-1g-LD	230.469	88.3823	1.38274	0.0494351
247955_at	NAP1;3 (NUCLEOSOME ASSEMBLY PROTEIN 1;3); DNA binding	NAP1;3	AT5G56950	WT-µg-LD	WT-1g-LD	430.592	165.284	1.38138	0.0153747
245372_at	60S ribosomal protein L27-3	AT4G15000	AT4G15000	WT-µg-LD	WT-1g-LD	3377.08	1297.1	1.38049	0.00393682
266678_at	haloacid dehalogenase-like hydrolase family protein	AT2G25870	AT2G25870	WT-µg-LD	WT-1g-LD	1072.56	412.009	1.38032	0.00926597
247747_at	RING/FYVE/PHD zinc finger-containing protein	AT5G59000	AT5G59000	WT-µg-LD	WT-1g-LD	194.269	74.6963	1.37895	0.00104703
260457_at	lung seven transmembrane receptor-like protein	AT1G72480	AT1G72480	WT-µg-LD	WT-1g-LD	249.338	95.8921	1.37862	0.0117308
250677_at	SWAP/Surp domain-containing protein	AT5G06520	AT5G06520	WT-µg-LD	WT-1g-LD	93.8548	36.1043	1.37826	0.0303944
249216_at	scpl42 (serine carboxypeptidase-like 42); serine-type carboxypeptidase	scpl42	AT5G42240	WT-µg-LD	WT-1g-LD	501.869	193.098	1.37798	0.00824556
261774_at	WD repeat-containing protein DWA2	DWA2	AT1G76260	WT-µg-LD	WT-1g-LD	242.897	93.4745	1.3777	0.00701309
247368_at	nuclear protein X1	NPX1	AT5G63320	WT-µg-LD	WT-1g-LD	683.625	263.485	1.37548	0.00392452
247348_at	BGAL10 (beta-galactosidase 10); beta-galactosidase/ catalytic/ cation binding	BGAL10	AT5G63810	WT-µg-LD	WT-1g-LD	142.249	54.8551	1.37472	0.0188315
266288_s_at	APUM1 (Arabidopsis Pumilio 1); RNA binding / binding	APUM1	AT2G29140 /// AT2G29200	WT-µg-LD	WT-1g-LD	525.99	202.855	1.37459	0.0108276
256725_at	trichome birefringence-like 37 protein	TBL37	AT2G34070	WT-µg-LD	WT-1g-LD	748.748	289.303	1.3719	0.0178156
261138_at	glycosyl transferase family protein	AT1G19710	AT1G19710	WT-µg-LD	WT-1g-LD	243.159	93.9926	1.37128	0.0115832
258071_s_at	putative plastid-lipid-associated protein 4	AT3G26070	AT3G26070 /// AT3G26080	WT-µg-LD	WT-1g-LD	2850.22	1102.09	1.37083	0.041939
257974_at	leucine-rich repeat-containing protein	AT3G20820	AT3G20820	WT-µg-LD	WT-1g-LD	773.791	299.51	1.36934	0.0290986
251483_at	mitochondrial ribosomal protein L51/S25/CI-B8 family protein	AT3G59650	AT3G59650	WT-µg-LD	WT-1g-LD	171.128	66.268	1.36869	0.0439042
260036_at	STN7 (Stt7 homolog STN7); kinase/ protein kinase	STN7	AT1G68830	WT-µg-LD	WT-1g-LD	1741.41	674.356	1.36868	0.0235693
251856_at	AMP1 (ALTERED MERISTEM PROGRAM 1); carboxypeptidase/ dipeptidase	AMP1	AT3G54720	WT-µg-LD	WT-1g-LD	138.397	53.6182	1.36802	0.0102764
265053_at	mannose-binding lectin superfamily protein	AT1G52000	AT1G52000	WT-µg-LD	WT-1g-LD	216.075	83.8019	1.36648	0.0188934
250562_at	TOM5 (MITOCHONDRIAL IMPORT RECEPTOR SUBUNIT TOM5 HOMOLOG)	TOM5	AT5G08040	WT-µg-LD	WT-1g-LD	1188.34	461.197	1.36549	0.000511816
254475_at	smB (small nuclear ribonucleoprotein associated protein B)	smB	AT4G20440	WT-µg-LD	WT-1g-LD	519.229	201.545	1.36527	0.000146592
257291_at	pentatricopeptide repeat-containing protein	AT3G15590	AT3G15590	WT-µg-LD	WT-1g-LD	1038.65	403.298	1.36479	0.0410515
263014_at	CAF2; RNA splicing factor, transesterification mechanism	CAF2	AT1G23400	WT-µg-LD	WT-1g-LD	464.43	180.394	1.36431	0.0370138
266780_at	ATGLR2.8; intracellular ligand-gated ion channel	ATGLR2.8	AT2G29110	WT-µg-LD	WT-1g-LD	938.057	364.665	1.3631	0.0157987
247004_at	DG1 (DELAYED GREENING 1)	DG1	AT5G67570	WT-µg-LD	WT-1g-LD	101.711	39.5534	1.3626	0.0198594
250884_at	CPSRP54 (CHLOROPLAST SIGNAL RECOGNITION PARTICLE 54 KDA SUBUNIT); 7S RNA binding / GTP binding / mRNA binding / signal sequence binding	CPSRP54	AT5G03940	WT-µg-LD	WT-1g-LD	803.663	312.57	1.36241	0.005602
249200_at	XRN2 (EXORIBONUCLEASE 2); 5'-3' exonuclease/ 5'-3' exoribonuclease/ nucleic acid binding	XRN2	AT5G42540	WT-µg-LD	WT-1g-LD	904.278	351.824	1.36191	0.0105326
265109_s_at	CC-NBS-LRR class disease resistance protein /// CC-NBS-LRR class disease resistance protein	AT1G62630 /// AT1G63360	AT1G62630 /// AT1G63360	WT-µg-LD	WT-1g-LD	1069.68	416.571	1.36054	0.0187701
255065_s_at	arginine amidohydrolase 2 /// arginase	AT4G08870 /// AT4G08900	AT4G08870 /// AT4G08900	WT-µg-LD	WT-1g-LD	1470.81	573.319	1.35921	0.0109284
263691_at	60S ribosomal protein L34-1	AT1G26880	AT1G26880	WT-µg-LD	WT-1g-LD	4627.53	1804.73	1.35846	0.00443057
265887_at	HCS1 (HOLOCARBOXYLASE SYNTHASE); biotin-[acetyl-CoA-carboxylase] ligase/ catalytic	HCS1	AT2G25710	WT-µg-LD	WT-1g-LD	363.606	141.882	1.35768	0.0488913
258466_at	ribosomal protein L12/ ATP-dependent Clp protease adaptor protein	AT3G06040	AT3G06040	WT-µg-LD	WT-1g-LD	1139.21	444.635	1.35734	0.004092
259599_at	SCPL45 (SERINE CARBOXYPEPTIDASE-LIKE 45 PRECURSOR); serine-type carboxypeptidase	SCPL45	AT1G28110	WT-µg-LD	WT-1g-LD	158.734	61.9767	1.35682	0.0353221
259852_at	AERO1 (Arabidopsis endoplasmic reticulum oxidoreductins 1); FAD binding / electron carrier/ oxidoreductase, acting on sulfur group of donors, disulfide as acceptor / protein binding	AERO1	AT1G72280	WT-µg-LD	WT-1g-LD	749.625	292.747	1.35651	0.0205674
251741_at	UGP3 (UDP-GLUCOSE PYROPHOSPHORYLASE 3)	UGP3	AT3G56040	WT-µg-LD	WT-1g-LD	308.082	120.322	1.35641	0.0371211
264441_at	hypothetical protein	AT1G27435	AT1G27435	WT-µg-LD	WT-1g-LD	936.808	365.938	1.35615	0.00733411
265412_at	TOC132 (MULTIMERIC TRANSLOCON COMPLEX IN THE OUTER ENVELOPE MEMBRANE 132); transmembrane receptor	TOC132	AT2G16640	WT-µg-LD	WT-1g-LD	905.823	353.935	1.35575	0.00907293
267115_s_at	ATCSLB04; cellulose synthase/ transferase/ transferase, transferring glycosyl groups	ATCSLB04	AT2G32530 /// AT2G32540	WT-µg-LD	WT-1g-LD	1622.55	634.321	1.35498	0.00682774
260522_x_at	hypothetical protein	AT2G41730	AT2G41730	WT-µg-LD	WT-1g-LD	802.689	313.834	1.35484	0.0139725
252297_at	EMB1080 (embryo defective 1080); structural constituent of ribosome	EMB1080	AT3G48930	WT-µg-LD	WT-1g-LD	4605.11	1801.03	1.35441	0.00643207
253622_at	ATCNGC9 (CYCLIC NUCLEOTIDE GATED CHANNEL 9); calmodulin binding / cyclic nucleotide binding / ion channel	ATCNGC9	AT4G30560	WT-µg-LD	WT-1g-LD	188.695	73.8938	1.35253	0.00413362
247637_at	HDS (4-HYDROXY-3-METHYLBUT-2-ENYL DIPHOSPHATE SYNTHASE); 4 iron, 4 sulfur cluster binding / 4-hydroxy-3-methylbut-2-en-1-yl diphosphate synthase	HDS	AT5G60600	WT-µg-LD	WT-1g-LD	3513.67	1376.05	1.35244	0.0411642
245696_at	PKS4 (phytochrome kinase substrate 4)	PKS4	AT5G04190	WT-µg-LD	WT-1g-LD	100.81	39.4837	1.35231	0.0274995
246762_at	CYCH;1 (CYCLIN H;1); cyclin-dependent protein kinase/ protein binding / protein kinase	CYCH;1	AT5G27620	WT-µg-LD	WT-1g-LD	137.857	54.0105	1.35186	0.00646486
260786_s_at	MEE5 (MATERNAL EFFECT EMBRYO ARREST 5); GTP binding / GTPase/ translation elongation factor/ translation factor, nucleic acid binding	MEE5	AT1G06220 /// AT5G25230	WT-µg-LD	WT-1g-LD	787.712	308.663	1.35164	0.00362742
265920_s_at	basic secretory protein family protein	AT2G15220	AT2G15120 /// AT2G15220	WT-µg-LD	WT-1g-LD	256.821	100.743	1.35009	0.0203722
245487_at	PHYD (PHYTOCHROME DEFECTIVE D); G-protein coupled photoreceptor/ red or far-red light photoreceptor/ signal transducer	PHYD	AT4G16250	WT-µg-LD	WT-1g-LD	428.405	168.079	1.34984	0.0496266
251496_at	pentatricopeptide repeat-containing protein	AT3G59040	AT3G59040	WT-µg-LD	WT-1g-LD	667.903	262.145	1.34927	0.0118783
256344_at	TFIIIA (TRANSCRIPTION FACTOR IIIA); 5S rDNA binding / 5S rRNA binding / nucleic acid binding / transcription factor/ zinc ion binding	TFIIIA	AT1G72050	WT-µg-LD	WT-1g-LD	903.103	354.88	1.34756	0.0487621
255308_at	NSF (N-ethylmaleimide sensitive factor); ATP binding / binding / nucleoside-triphosphatase/ nucleotide binding	NSF	AT4G04910	WT-µg-LD	WT-1g-LD	1068.39	420	1.34698	0.00437703
262112_at	hypothetical protein	AT1G02870	AT1G02870	WT-µg-LD	WT-1g-LD	1328.55	522.395	1.34664	0.0001869
264057_at	RAP2.7 (RELATED TO AP2.7); DNA binding / transcription factor	RAP2.7	AT2G28550	WT-µg-LD	WT-1g-LD	320.961	126.219	1.34647	0.0145354
253889_at	FEY (FOREVER YOUNG); binding / catalytic/ oxidoreductase	FEY	AT4G27760	WT-µg-LD	WT-1g-LD	166.416	65.4516	1.3463	0.0123458
250248_at	ZIF1 (ZINC INDUCED FACILITATOR 1); carbohydrate transmembrane transporter/ sugar:hydrogen symporter/ tetracycline:hydrogen antiporter	ZIF1	AT5G13740	WT-µg-LD	WT-1g-LD	1396.49	549.358	1.34599	0.0278815
253085_s_at	Histidine kinase-, DNA gyrase B-, and HSP90-like ATPase family protein	AT4G36280	AT4G36280	WT-µg-LD	WT-1g-LD	114.756	45.1442	1.34595	0.0136682
261418_at	ribosomal protein L29 family protein	AT1G07830	AT1G07830	WT-µg-LD	WT-1g-LD	982.331	386.518	1.34567	0.0542635
249026_at	OSB3 (ORGANELLAR SINGLE-STRANDED DNA BINDING PROTEIN 3); single-stranded DNA binding	OSB3	AT5G44785	WT-µg-LD	WT-1g-LD	369.296	145.309	1.34565	0.00403092
247289_at	DIT2.1 (DICARBOXYLATE TRANSPORT 2.1); oxoglutarate:malate antiporter	DIT2.1	AT5G64290	WT-µg-LD	WT-1g-LD	1522.69	599.285	1.34531	0.00620284
250383_at	P-loop containing nucleoside triphosphate hydrolases superfamily protein	AT5G11480	AT5G11480	WT-µg-LD	WT-1g-LD	605.38	238.324	1.34492	0.0113474
246645_at	protein OS-9	AT5G35080	AT5G35080	WT-µg-LD	WT-1g-LD	851.218	335.278	1.34417	0.0221592
266466_at	transducin/WD-40 repeat-containing protein	AT2G47790	AT2G47790	WT-µg-LD	WT-1g-LD	559.763	220.499	1.34405	0.0244016
267110_at	hypothetical protein	AT2G14800	AT2G14800	WT-µg-LD	WT-1g-LD	89.6071	35.3008	1.34391	0.0277827
266896_at	DEAD-box ATP-dependent RNA helicase 6	AT2G45810	AT2G45810	WT-µg-LD	WT-1g-LD	1442.39	568.266	1.34383	0.0543532
253295_at	tRNA synthetase class II (D, K and N) family protein	AT4G33760	AT4G33760	WT-µg-LD	WT-1g-LD	206.287	81.2773	1.34373	0.0120781
253302_at	hypothetical protein	AT4G33660	AT4G33660	WT-µg-LD	WT-1g-LD	779.83	307.401	1.34304	0.0382552
253374_at	Haloacid dehalogenase-like hydrolase (HAD) superfamily protein	AT4G33140	AT4G33140	WT-µg-LD	WT-1g-LD	241.097	95.1002	1.3421	0.00793516
257300_at	MtN21-like transporter family protein UMAMIT47	AT3G28080	AT3G28080	WT-µg-LD	WT-1g-LD	314.174	123.965	1.34163	0.00909999
247884_at	CER3 (ECERIFERUM 3); binding / catalytic/ iron ion binding / oxidoreductase	CER3	AT5G57800	WT-µg-LD	WT-1g-LD	432.514	170.662	1.3416	0.0128047
259240_at	hypothetical protein	AT3G11590	AT3G11590	WT-µg-LD	WT-1g-LD	270.883	106.891	1.34152	0.0310176
257062_at	EMB2454 (embryo defective 2454); protein binding / zinc ion binding	EMB2454	AT3G18290	WT-µg-LD	WT-1g-LD	1179.22	465.458	1.34111	0.0386707
266237_at	ATRPC14 (RNA POLYMERASE 14 KDA SUBUNIT); DNA binding / DNA-directed RNA polymerase/ protein dimerization	ATRPC14	AT2G29540	WT-µg-LD	WT-1g-LD	309.026	121.988	1.34099	0.044307
250987_at	pentatricopeptide repeat-containing protein	AT5G02860	AT5G02860	WT-µg-LD	WT-1g-LD	99.6753	39.3695	1.34016	0.0291785
261080_at	PCNA1 (PROLIFERATING CELLULAR NUCLEAR ANTIGEN); DNA binding / DNA polymerase processivity factor/ protein binding	PCNA1	AT1G07370	WT-µg-LD	WT-1g-LD	111.577	44.0889	1.33956	0.0120398
266648_at	OVA4 (ovule abortion 4); ATP binding / aminoacyl-tRNA ligase/ nucleotide binding / tryptophan-tRNA ligase	OVA4	AT2G25840	WT-µg-LD	WT-1g-LD	258.59	102.186	1.33947	0.0443385
253926_at	RNA recognition motif-containing protein	AT4G26650	AT4G26650	WT-µg-LD	WT-1g-LD	674.623	266.634	1.33922	0.00945682
254503_at	PTAC9 (PLASTID TRANSCRIPTIONALLY ACTIVE 9); single-stranded DNA binding	PTAC9	AT4G20010	WT-µg-LD	WT-1g-LD	1020.85	403.778	1.33814	0.00930424
261746_at	PSAO (photosystem I subunit O)	PSAO	AT1G08380	WT-µg-LD	WT-1g-LD	6882.55	2725	1.33669	0.0100464
267516_at	RPT2 (ROOT PHOTOTROPISM 2); protein binding	RPT2	AT2G30520	WT-µg-LD	WT-1g-LD	2121.53	840.025	1.3366	0.0347298
261065_at	hypothetical protein	AT1G07500	AT1G07500	WT-µg-LD	WT-1g-LD	210.145	83.2173	1.33643	0.020341
246479_at	cytochrome c oxidase biogenesis protein Cmc1-like protein	AT5G16060	AT5G16060	WT-µg-LD	WT-1g-LD	492.217	194.931	1.33633	0.0072332
251182_at	ATERDJ3B; heat shock protein binding / unfolded protein binding	ATERDJ3B	AT3G62600	WT-µg-LD	WT-1g-LD	6412.39	2540.08	1.33599	0.0488127
245094_at	DPE2 (DISPROPORTIONATING ENZYME 2); 4-alpha-glucanotransferase/ heteroglycan binding	DPE2	AT2G40840	WT-µg-LD	WT-1g-LD	542.651	214.973	1.33587	0.00523905
247578_at	hypothetical protein	AT5G61300	AT5G61300	WT-µg-LD	WT-1g-LD	79.6028	31.5392	1.33567	0.0197223
258038_at	glycolipid transfer protein 3	AT3G21260	AT3G21260	WT-µg-LD	WT-1g-LD	353.018	139.977	1.33455	0.00498259
261400_at	putative protein phosphatase 2C 18	AT1G79630	AT1G79630	WT-µg-LD	WT-1g-LD	148.813	59.0176	1.33428	0.0272362
254188_at	UGE2 (UDP-D-glucose/UDP-D-galactose 4-epimerase 2); UDP-glucose 4-epimerase/ protein dimerization	UGE2	AT4G23920	WT-µg-LD	WT-1g-LD	909.039	360.604	1.33393	0.026436
265895_at	hypothetical protein	AT2G15000	AT2G15000	WT-µg-LD	WT-1g-LD	282.429	112.048	1.33377	0.00246113
259006_at	60S acidic ribosomal protein P0-2	AT3G09200	AT3G09200	WT-µg-LD	WT-1g-LD	11504.5	4564.34	1.33372	0.0301008
266997_at	protein REDUCED WALL ACETYLATION 3	AT2G34410	---	WT-µg-LD	WT-1g-LD	173.473	68.8403	1.33338	0.0307499
253058_at	ribosomal protein L12/ ATP-dependent Clp protease adaptor protein	AT4G37660	AT4G37660	WT-µg-LD	WT-1g-LD	339.305	134.671	1.33315	0.00741525
254670_at	transcription factor TCP2	TCP2	AT4G18390	WT-µg-LD	WT-1g-LD	407.804	161.892	1.33285	0.00676605
247812_at	peroxidase	AT5G58390	AT5G58390	WT-µg-LD	WT-1g-LD	61.4635	24.4049	1.33256	0.0220406
264885_s_at	probable disease resistance protein /// probable disease resistance protein /// probable disease resistance protein /// probable disease resistance protein	AT1G61180 /// AT1G61190 /// AT1G61300 /// AT1G61310	AT1G61180 /// AT1G61190 /// AT1G61300 /// AT1G61310	WT-µg-LD	WT-1g-LD	1429.2	567.796	1.33176	0.0146304
258485_at	acyl-[acyl-carrier-protein] desaturase	AT3G02630	AT3G02630	WT-µg-LD	WT-1g-LD	796.105	316.333	1.33152	0.0201318
246483_at	NIK1 (NSP-INTERACTING KINASE 1); kinase	NIK1	AT5G16000	WT-µg-LD	WT-1g-LD	83.6981	33.2594	1.33143	0.0440564
253213_at	DEAD-box ATP-dependent RNA helicase 16	AT4G34910	AT4G34910	WT-µg-LD	WT-1g-LD	271.994	108.189	1.33002	0.0158425
254293_at	IQD22 (IQ-domain 22); calmodulin binding	IQD22	AT4G23060	WT-µg-LD	WT-1g-LD	242.73	96.5936	1.32935	0.0232653
247972_at	HAG2 (HISTONE ACETYLTRANSFERASE OF THE GNAT FAMILY 2); H4 histone acetyltransferase/ histone acetyltransferase	HAG2	AT5G56740	WT-µg-LD	WT-1g-LD	221.135	88.0235	1.32897	0.00935063
250718_at	emb2735 (embryo defective 2735)	emb2735	AT5G06240	WT-µg-LD	WT-1g-LD	583.448	232.258	1.32887	0.00896184
259085_at	transport protein particle (TRAPP) component	AT3G05000	AT3G05000	WT-µg-LD	WT-1g-LD	797.046	317.3	1.32882	0.00551269
245867_at	ATATP-PRT1 (ATP PHOSPHORIBOSYL TRANSFERASE 1); ATP phosphoribosyltransferase	ATATP-PRT1	AT1G58080	WT-µg-LD	WT-1g-LD	1398.83	557.02	1.32842	0.0165509
257510_at	hypothetical protein	AT1G55360	AT1G55360	WT-µg-LD	WT-1g-LD	325.631	129.694	1.32813	0.00164713
248476_at	lipase domain-containing protein	AT5G50890	AT5G50890	WT-µg-LD	WT-1g-LD	81.3051	32.4173	1.32658	0.0234982
247075_at	PLP3b (Phosducin-like protein 3 homolog); beta-tubulin binding	PLP3b	AT5G66410	WT-µg-LD	WT-1g-LD	444.237	177.149	1.32636	0.00798356
255142_at	SAPX (STROMAL ASCORBATE PEROXIDASE); L-ascorbate peroxidase	SAPX	AT4G08390	WT-µg-LD	WT-1g-LD	2376.77	948.762	1.32488	0.00979671
266361_at	tetratricopeptide repeat-containing protein	AT2G32450	AT2G32450	WT-µg-LD	WT-1g-LD	195.027	77.9103	1.32379	0.0219176
265941_s_at	recA DNA recombination family protein /// putative DNA repair protein recA homolog 4	AT2G19490 /// AT3G32920	AT2G19490 /// AT3G32920	WT-µg-LD	WT-1g-LD	113.356	45.2959	1.32341	0.00691544
258166_at	transducin/WD40 domain-containing protein	AT3G21540	AT3G21540	WT-µg-LD	WT-1g-LD	211.015	84.3485	1.32291	0.00484454
245264_at	RING/U-box domain-containing protein	AT4G17245	AT4G17245	WT-µg-LD	WT-1g-LD	2265.86	905.874	1.32268	0.00950483
247370_at	nuclear protein X1	NPX1	AT5G63320	WT-µg-LD	WT-1g-LD	656.881	262.72	1.32211	0.00209334
256000_at	glycyl-tRNA synthetase / glycine--tRNA ligase	AT1G29880	AT1G29880	WT-µg-LD	WT-1g-LD	1161.93	464.743	1.32201	0.0197049
252229_at	hypothetical protein	AT3G49890	AT3G49890	WT-µg-LD	WT-1g-LD	152.577	61.0289	1.32197	0.00657467
250897_at	phosphoadenosine phosphosulfate (PAPS) reductase family protein	AT5G03430	AT5G03430	WT-µg-LD	WT-1g-LD	1270.45	508.287	1.32162	0.0303971
253517_at	ABC1-like kinase related to chlorophyll degradation and oxidative stress 1	AT4G31390	AT4G31390	WT-µg-LD	WT-1g-LD	708.328	283.467	1.32123	0.0307784
266391_at	strictosidine synthase-like 2	SSL2	AT2G41290	WT-µg-LD	WT-1g-LD	156.348	62.5745	1.32111	0.00607508
248510_at	---	---	AT5G50315	WT-µg-LD	WT-1g-LD	205.136	82.1133	1.32089	0.0309347
259936_at	EBS1 (EMS-mutagenized bri1 suppressor 1); UDP-glucose:glycoprotein glucosyltransferase/ transferase, transferring glycosyl groups / transferase, transferring hexosyl groups	EBS1	---	WT-µg-LD	WT-1g-LD	1066.31	427.113	1.31994	0.00868717
261769_at	PETE1 (PLASTOCYANIN 1); copper ion binding / electron carrier	PETE1	AT1G76100	WT-µg-LD	WT-1g-LD	1718.11	688.987	1.31827	0.0180942
256545_at	---	---	AT3G14800	WT-µg-LD	WT-1g-LD	124.563	49.981	1.31742	0.0235657
253062_at	NPY5 (NAKED PINS IN YUC MUTANTS 5); protein binding / signal transducer	NPY5	AT4G37590	WT-µg-LD	WT-1g-LD	291.972	117.171	1.31722	0.00322169
250151_at	ATNRT2.7 (Arabidopsis thaliana high affinity nitrate transporter 2.7); nitrate transmembrane transporter	ATNRT2.7	AT5G14570	WT-µg-LD	WT-1g-LD	563.083	225.98	1.31716	0.0528877
267644_s_at	TRAF-like family protein /// TRAF-like family protein	AT2G32870 /// AT2G32880	AT2G32870 /// AT2G32880	WT-µg-LD	WT-1g-LD	523.125	210.186	1.31549	0.0137206
261124_at	hypothetical protein	AT1G04900	AT1G04900	WT-µg-LD	WT-1g-LD	193.127	77.6006	1.31541	0.00153927
263880_at	hypothetical protein	AT2G21960	AT2G21960	WT-µg-LD	WT-1g-LD	1335.63	536.712	1.3153	0.0133416
257085_at	UBP14 (UBIQUITIN-SPECIFIC PROTEASE 14); ubiquitin-specific protease	UBP14	AT3G20630	WT-µg-LD	WT-1g-LD	327.246	131.529	1.31499	0.00823618
262473_at	FTSH1 (FtsH protease 1); ATP-dependent peptidase/ ATPase/ metallopeptidase	FTSH1	AT1G50250	WT-µg-LD	WT-1g-LD	2965.15	1192.34	1.31431	0.0125814
249702_at	O-fucosyltransferase family protein	AT5G35570	AT5G35570	WT-µg-LD	WT-1g-LD	185.513	74.6421	1.31346	0.0131222
249810_at	hypothetical protein	AT5G23920	AT5G23920	WT-µg-LD	WT-1g-LD	1208.58	486.282	1.31345	0.0163659
264698_at	RNA recognition motif-containing protein	AT1G70200	AT1G70200	WT-µg-LD	WT-1g-LD	434.521	174.874	1.31311	0.0148142
259090_at	40S ribosomal protein S24-1	AT3G04920	AT3G04920	WT-µg-LD	WT-1g-LD	2808.73	1130.46	1.31301	0.0305882
262818_at	LEW1 (LEAF WILTING 1); dehydrodolichyl diphosphate synthase	LEW1	AT1G11755	WT-µg-LD	WT-1g-LD	216.548	87.1934	1.31239	0.0379104
245274_at	putative methyltransferase PMT3	AT4G14360	AT4G14360	WT-µg-LD	WT-1g-LD	591.174	238.052	1.31231	0.00648575
252450_s_at	leucine-rich repeat protein kinase-like protein /// Leucine-rich repeat protein kinase family protein	AT3G47090 /// AT3G47580	AT3G47090 /// AT3G47580	WT-µg-LD	WT-1g-LD	292.47	117.785	1.31213	0.0125284
258467_at	3-ketodihydrosphinganine reductase-like protein	AT3G06060	AT3G06060	WT-µg-LD	WT-1g-LD	575.818	231.974	1.31165	0.0266404
261620_s_at	PGY2 (PIGGYBACK2); structural constituent of ribosome	PGY2	AT1G33120 /// AT1G33140	WT-µg-LD	WT-1g-LD	7215.79	2908.24	1.31101	0.00367088
267421_at	AICARFT/IMPCHase bienzyme family protein	AT2G35040	AT2G35040	WT-µg-LD	WT-1g-LD	681.917	274.843	1.31099	0.0313542
250433_at	histone H3 /// histone H3 /// histone H3 /// histone H3 /// histone H3.1	AT1G09200 /// AT3G27360 /// AT5G10390 /// AT5G10400 /// AT5G65360	AT5G10400	WT-µg-LD	WT-1g-LD	134.606	54.2658	1.31063	0.003697
247963_at	O-Glycosyl hydrolases family 17 protein	AT5G56590	AT5G56590	WT-µg-LD	WT-1g-LD	166.122	66.9767	1.31051	0.0154848
260007_at	glycine-rich protein	AT1G67870	AT1G67870	WT-µg-LD	WT-1g-LD	1501.63	605.681	1.3099	0.0122174
256106_at	mitochondrial 28S ribosomal protein S29-like protein	AT1G16870	AT1G16870	WT-µg-LD	WT-1g-LD	911.745	367.873	1.30942	0.00535408
249362_at	SGF29 tudor-like domain -containing protein	AT5G40550	AT5G40550	WT-µg-LD	WT-1g-LD	91.2414	36.8171	1.30931	0.00213494
245336_at	protein ROOT MERISTEM GROWTH FACTOR 6	RGF6	AT4G16515	WT-µg-LD	WT-1g-LD	159.696	64.4443	1.3092	0.0450034
264705_at	ATP binding/leucine-tRNA ligases/aminoacyl-tRNA ligases	AT1G09620	AT1G09620	WT-µg-LD	WT-1g-LD	1273.63	514.092	1.30885	0.00400365
254480_at	ATRABE1B (ARABIDOPSIS RAB GTPASE HOMOLOG E1B); GTP binding / GTPase/ translation elongation factor	ATRABE1B	AT4G20360	WT-µg-LD	WT-1g-LD	10810.2	4363.78	1.30874	0.0341904
258317_at	pentatricopeptide repeat-containing protein	AT3G22670	AT3G22670	WT-µg-LD	WT-1g-LD	90.5112	36.5396	1.30864	0.00909756
249035_at	GLK2 (GOLDEN2-LIKE 2); DNA binding / transcription factor/ transcription regulator	GLK2	AT5G44190	WT-µg-LD	WT-1g-LD	1317.9	532.397	1.30767	0.00815471
262953_at	DNA-directed RNA polymerase	AT1G75670	AT1G75670	WT-µg-LD	WT-1g-LD	562.175	227.106	1.30765	0.0025303
248491_at	rubredoxin-like protein	AT5G51010	AT5G51010	WT-µg-LD	WT-1g-LD	1727.08	697.731	1.30759	0.00975126
245886_at	40S ribosomal protein S15-4	AT5G09510	AT5G09510	WT-µg-LD	WT-1g-LD	1378.23	556.853	1.30745	0.00532485
245917_at	tetratricopeptide repeat domain-containing protein	AT5G28740	AT5G28740	WT-µg-LD	WT-1g-LD	635.544	256.859	1.30702	0.00678461
245936_at	hydrolase, alpha/beta fold family protein	AT5G19850	AT5G19850	WT-µg-LD	WT-1g-LD	791.692	320.47	1.30475	0.0271855
262563_at	SERK2 (SOMATIC EMBRYOGENESIS RECEPTOR-LIKE KINASE 2); kinase	SERK2	AT1G34210	WT-µg-LD	WT-1g-LD	384.462	155.671	1.30434	0.0453121
245941_at	emb2734 (embryo defective 2734); binding / lyase	emb2734	AT5G19820	WT-µg-LD	WT-1g-LD	928.984	376.196	1.30417	0.0214182
266822_at	large subunit ribosomal protein L24e	AT2G44860	AT2G44860	WT-µg-LD	WT-1g-LD	2044.61	828.016	1.3041	0.00215704
267640_at	COP1 (CONSTITUTIVE PHOTOMORPHOGENIC 1); protein binding / ubiquitin-protein ligase	COP1	AT2G32950	WT-µg-LD	WT-1g-LD	797.397	323.103	1.30331	0.0324614
259883_at	ribophorin I	AT1G76400	AT1G76400	WT-µg-LD	WT-1g-LD	948.261	384.391	1.30271	0.0265242
244995_at	ATPase IV subunit	atpI	ATCG00150	WT-µg-LD	WT-1g-LD	385.201	156.256	1.3017	0.000328202
255842_at	scpl46 (serine carboxypeptidase-like 46); serine-type carboxypeptidase	scpl46	AT2G33530	WT-µg-LD	WT-1g-LD	558.808	226.683	1.30168	0.0177335
251409_at	zinc-binding ribosomal protein family protein	AT3G60245	AT3G60245	WT-µg-LD	WT-1g-LD	10565.9	4288.31	1.30093	0.0348762
261618_at	MATE efflux family protein	AT1G33110	AT1G33110	WT-µg-LD	WT-1g-LD	1572.61	638.271	1.30092	0.0147116
248101_at	co-chaperone GrpE family protein	AT5G55200	AT5G55200	WT-µg-LD	WT-1g-LD	509.473	206.954	1.2997	0.0100474
251823_at	SET domain-containing protein	AT3G55080	AT3G55080	WT-µg-LD	WT-1g-LD	255.543	103.829	1.29935	0.00945556
266285_at	hypothetical protein	AT2G29180	AT2G29180	WT-µg-LD	WT-1g-LD	480.508	195.261	1.29916	0.0100621
[truncated: 2,435 more rows]
